# Supplementary material for: Discovery of new triterpene glycosides from Dendrobium officinale with their α-glucosidase and α-amylase inhibitory activity
Source: PubMed Central journal article supplement — RSC Adv. 2024 Apr 16;14(17):12147–57. doi: 10.1039/d4ra01483a (PMC11019663; doi:10.1039/d4ra01483a), 2024-04-16
Supplement: RA-014-D4RA01483A-s001.pdf [file RA-014-D4RA01483A-s001.pdf]

## Content

|                                                                                                           |    |
|-----------------------------------------------------------------------------------------------------------|----|
| Acid hydrolysis of compounds <b>1-7</b>                                                                   | 3  |
| $\alpha$ -Glucosidase inhibitory assay                                                                    | 4  |
| $\alpha$ -Amylase inhibitory assay                                                                        | 4  |
| Table S1. The $\alpha$ -glucosidase and $\alpha$ -amylase inhibitory effects of the compounds <b>1-13</b> | 5  |
| Figure S1 IR spectrum of compound <b>1</b>                                                                | 6  |
| Figure S2 HR-ESI-MS of compound <b>1</b>                                                                  | 6  |
| Figure S3 $^1\text{H}$ -NMR spectrum of compound <b>1</b> in $\text{CD}_3\text{OD}$                       | 7  |
| Figure S4 Extended $^1\text{H}$ -NMR spectrum of compound <b>1</b> in $\text{CD}_3\text{OD}$              | 8  |
| Figure S5 $^{13}\text{C}$ -NMR spectrum of compound <b>1</b> in $\text{CD}_3\text{OD}$                    | 9  |
| Figure S6 HSQC spectrum of compound <b>1</b> in $\text{CD}_3\text{OD}$                                    | 10 |
| Figure S7 HMBC spectrum of compound <b>1</b> in $\text{CD}_3\text{OD}$                                    | 11 |
| Figure S8 Expanded HMBC spectrum of compound <b>1</b> in $\text{CD}_3\text{OD}$                           | 12 |
| Figure S9 COSY spectrum of compound <b>1</b> in $\text{CD}_3\text{OD}$                                    | 13 |
| Figure S10 NOESY spectrum of compound <b>1</b> in $\text{CD}_3\text{OD}$                                  | 14 |
| Figure S11 IR spectrum of compound <b>2</b>                                                               | 15 |
| Figure S12 HR-ESI-MS of compound <b>2</b>                                                                 | 15 |
| Figure S13 $^1\text{H}$ -NMR spectrum of compound <b>2</b> in $\text{CD}_3\text{OD}$                      | 16 |
| Figure S14 Extended $^1\text{H}$ -NMR spectrum of compound <b>2</b> in $\text{CD}_3\text{OD}$             | 17 |
| Figure S15 $^{13}\text{C}$ -NMR spectrum of compound <b>2</b> in $\text{CD}_3\text{OD}$                   | 18 |
| Figure S16 HSQC spectrum of compound <b>2</b> in $\text{CD}_3\text{OD}$                                   | 19 |
| Figure S17 HMBC spectrum of compound <b>2</b> in $\text{CD}_3\text{OD}$                                   | 20 |
| Figure S18 Expanded HMBC spectrum of compound <b>2</b> in $\text{CD}_3\text{OD}$                          | 21 |
| Figure S19 Expanded HMBC spectrum of compound <b>2</b> in $\text{CD}_3\text{OD}$                          | 22 |
| Figure S20 COSY spectrum of compound <b>2</b> in $\text{CD}_3\text{OD}$                                   | 23 |
| Figure S21 NOESY spectrum of compound <b>2</b> in $\text{CD}_3\text{OD}$                                  | 24 |
| Figure S22 IR spectrum of compound <b>3</b>                                                               | 25 |
| Figure S23 HR-ESI-MS of compound <b>3</b>                                                                 | 25 |
| Figure S24 $^1\text{H}$ -NMR spectrum of compound <b>3</b> in $\text{CD}_3\text{OD}$                      | 26 |
| Figure S25 Extended $^1\text{H}$ -NMR spectrum of compound <b>3</b> in $\text{CD}_3\text{OD}$             | 27 |
| Figure S26 $^{13}\text{C}$ -NMR spectrum of compound <b>3</b> in $\text{CD}_3\text{OD}$                   | 28 |
| Figure S27 HSQC spectrum of compound <b>3</b> in $\text{CD}_3\text{OD}$                                   | 29 |
| Figure S28 HMBC spectrum of compound <b>3</b> in $\text{CD}_3\text{OD}$                                   | 30 |
| Figure S29 Expanded HMBC spectrum of compound <b>3</b> in $\text{CD}_3\text{OD}$                          | 31 |
| Figure S30 COSY spectrum of compound <b>3</b> in $\text{CD}_3\text{OD}$                                   | 32 |
| Figure S31 NOESY spectrum of compound <b>3</b> in $\text{CD}_3\text{OD}$                                  | 33 |
| Figure S32 IR spectrum of compound <b>4</b>                                                               | 34 |
| Figure S33 HR-ESI-MS of compound <b>4</b>                                                                 | 34 |
| Figure S34 $^1\text{H}$ -NMR spectrum of compound <b>4</b> in $\text{CD}_3\text{OD}$                      | 35 |
| Figure S35 Extended $^1\text{H}$ -NMR spectrum of compound <b>4</b> in $\text{CD}_3\text{OD}$             | 36 |
| Figure S36 $^{13}\text{C}$ -NMR spectrum of compound <b>4</b> in $\text{CD}_3\text{OD}$                   | 37 |
| Figure S37 HSQC spectrum of compound <b>4</b> in $\text{CD}_3\text{OD}$                                   | 38 |
| Figure S38 HMBC spectrum of compound <b>4</b> in $\text{CD}_3\text{OD}$                                   | 39 |
| Figure S39 Expanded HMBC spectrum of compound <b>4</b> in $\text{CD}_3\text{OD}$                          | 40 |
| Figure S40 Expanded HMBC spectrum of compound <b>4</b> in $\text{CD}_3\text{OD}$                          | 41 |
| Figure S41 COSY spectrum of compound <b>4</b> in $\text{CD}_3\text{OD}$                                   | 42 |
| Figure S42 NOESY spectrum of compound <b>4</b> in $\text{CD}_3\text{OD}$                                  | 43 |
| Figure S43 IR spectrum of compound <b>5</b>                                                               | 44 |
| Figure S44 HR-ESI-MS of compound <b>5</b>                                                                 | 44 |
| Figure S45 $^1\text{H}$ -NMR spectrum of compound <b>5</b> in $\text{CD}_3\text{OD}$                      | 45 |
| Figure S46 Extended $^1\text{H}$ -NMR spectrum of compound <b>5</b> in $\text{CD}_3\text{OD}$             | 46 |
| Figure S47 $^{13}\text{C}$ -NMR spectrum of compound <b>5</b> in $\text{CD}_3\text{OD}$                   | 47 |

|            |                                                                                 |    |
|------------|---------------------------------------------------------------------------------|----|
| Figure S48 | HSQC spectrum of compound <b>5</b> in CD <sub>3</sub> OD                        | 48 |
| Figure S49 | HMBC spectrum of compound <b>5</b> in CD <sub>3</sub> OD                        | 49 |
| Figure S50 | Expanded HMBC spectrum of compound <b>5</b> in CD <sub>3</sub> OD               | 50 |
| Figure S51 | COSY spectrum of compound <b>5</b> in CD <sub>3</sub> OD                        | 51 |
| Figure S52 | NOESY spectrum of compound <b>5</b> in CD <sub>3</sub> OD                       | 52 |
| Figure S53 | IR spectrum of compound <b>6</b>                                                | 53 |
| Figure S54 | HR-ESI-MS of compound <b>6</b>                                                  | 53 |
| Figure S55 | <sup>1</sup> H-NMR spectrum of compound <b>6</b> in CD <sub>3</sub> OD          | 54 |
| Figure S56 | Extended <sup>1</sup> H-NMR spectrum of compound <b>6</b> in CD <sub>3</sub> OD | 55 |
| Figure S57 | <sup>13</sup> C-NMR spectrum of compound <b>6</b> in CD <sub>3</sub> OD         | 56 |
| Figure S58 | HSQC spectrum of compound <b>6</b> in CD <sub>3</sub> OD                        | 57 |
| Figure S59 | HMBC spectrum of compound <b>6</b> in CD <sub>3</sub> OD                        | 58 |
| Figure S60 | Expanded HMBC spectrum of compound <b>6</b> in CD <sub>3</sub> OD               | 59 |
| Figure S61 | COSY spectrum of compound <b>6</b> in CD <sub>3</sub> OD                        | 60 |
| Figure S62 | NOESY spectrum of compound <b>6</b> in CD <sub>3</sub> OD                       | 61 |
| Figure S63 | IR spectrum of compound <b>7</b>                                                | 62 |
| Figure S64 | HR-ESI-MS of compound <b>7</b>                                                  | 62 |
| Figure S65 | <sup>1</sup> H-NMR spectrum of compound <b>7</b> in CD <sub>3</sub> OD          | 63 |
| Figure S66 | Extended <sup>1</sup> H-NMR spectrum of compound <b>7</b> in CD <sub>3</sub> OD | 64 |
| Figure S67 | <sup>13</sup> C-NMR spectrum of compound <b>7</b> in CD <sub>3</sub> OD         | 65 |
| Figure S68 | HSQC spectrum of compound <b>7</b> in CD <sub>3</sub> OD                        | 66 |
| Figure S69 | HMBC spectrum of compound <b>7</b> in CD <sub>3</sub> OD                        | 67 |
| Figure S70 | Expanded HMBC spectrum of compound <b>7</b> in CD <sub>3</sub> OD               | 68 |
| Figure S71 | Expanded HMBC spectrum of compound <b>7</b> in CD <sub>3</sub> OD               | 69 |
| Figure S72 | COSY spectrum of compound <b>7</b> in CD <sub>3</sub> OD                        | 70 |
| Figure S73 | NOESY spectrum of compound <b>7</b> in CD <sub>3</sub> OD                       | 71 |
| Figure S74 | <sup>1</sup> H-NMR spectrum of compound <b>8</b> in CD <sub>3</sub> OD          | 72 |
| Figure S75 | <sup>13</sup> C-NMR spectrum of compound <b>8</b> in CD <sub>3</sub> OD         | 72 |
| Figure S76 | <sup>1</sup> H-NMR spectrum of compound <b>9</b> in CD <sub>3</sub> OD          | 73 |
| Figure S77 | <sup>13</sup> C-NMR spectrum of compound <b>9</b> in CD <sub>3</sub> OD         | 73 |
| Figure S78 | <sup>1</sup> H-NMR spectrum of compound <b>10</b> in CD <sub>3</sub> OD         | 74 |
| Figure S79 | <sup>13</sup> C-NMR spectrum of compound <b>10</b> in CD <sub>3</sub> OD        | 74 |
| Figure S80 | <sup>1</sup> H-NMR spectrum of compound <b>11</b> in CD <sub>3</sub> OD         | 75 |
| Figure S81 | <sup>13</sup> C-NMR spectrum of compound <b>11</b> in CD <sub>3</sub> OD        | 75 |
| Figure S82 | <sup>1</sup> H-NMR spectrum of compound <b>12</b> in CD <sub>3</sub> OD         | 76 |
| Figure S83 | <sup>13</sup> C-NMR spectrum of compound <b>12</b> in CD <sub>3</sub> OD        | 76 |
| Figure S84 | <sup>1</sup> H-NMR spectrum of compound <b>13</b> in CD <sub>3</sub> OD         | 77 |
| Figure S85 | <sup>13</sup> C-NMR spectrum of compound <b>13</b> in CD <sub>3</sub> OD        | 77 |

### Acid hydrolysis of compounds 1-7

Compounds **1-7** (each, 5.0 mg) were separately dissolved in 1.0 M HCl (dioxane–H<sub>2</sub>O, 1:1, v/v, 1.0 mL) and heated to 80 °C in a water bath for 3 h. For each compound, the acidic solution was neutralized with silver carbonate, the precipitated silver chloride was removed, and the solution was concentrated thoroughly under a nitrogen atmosphere. The residue was re-dissolved in 1.0 mL of water and extracted with chloroform (three times, each 1 mL). The aqueous layer was concentrated to dryness using nitrogen gas and monosaccharides were purified by preparative TLC (pre-coated silica gel 60 F<sub>254</sub>, MeCOEt–isoPrOH–Me<sub>2</sub>CO–H<sub>2</sub>O (20:10:7:6). The specific rotations  $[\alpha]_D^{25}$  of sugars were determined after dissolving in H<sub>2</sub>O.

For compound **1**: glucose (1.2 mg,  $R_f = 0.42$ ,  $[\alpha]_D^{25} +48.0$ ), arabinose (0.8 mg,  $R_f = 0.48$ ,  $[\alpha]_D^{25} +42.0$ ), rhamnose (0.8 mg,  $R_f = 0.65$ ,  $[\alpha]_D^{25} +18.0$ ).

For compound **2**: glucose (1.3 mg,  $R_f = 0.42$ ,  $[\alpha]_D^{25} +47.0$ ), arabinose (0.7 mg,  $R_f = 0.48$ ,  $[\alpha]_D^{25} +41.0$ ), rhamnose (0.8 mg,  $R_f = 0.65$ ,  $[\alpha]_D^{25} +19.0$ ).

For compound **3**: glucose (1.2 mg,  $R_f = 0.42$ ,  $[\alpha]_D^{25} +47.0$ ), arabinose (0.8 mg,  $R_f = 0.48$ ,  $[\alpha]_D^{25} +41.5$ ), rhamnose (0.9 mg,  $R_f = 0.65$ ,  $[\alpha]_D^{25} +19.0$ ).

For compound **4**: glucose (1.2 mg,  $R_f = 0.42$ ,  $[\alpha]_D^{25} +48.5$ ), arabinose (0.8 mg,  $R_f = 0.48$ ,  $[\alpha]_D^{25} +41.5$ ), rhamnose (0.8 mg,  $R_f = 0.65$ ,  $[\alpha]_D^{25} +18.0$ ).

For compound **5**: glucose (1.2 mg,  $R_f = 0.42$ ,  $[\alpha]_D^{25} +48.0$ ), arabinose (0.8 mg,  $R_f = 0.48$ ,  $[\alpha]_D^{25} +42.0$ ), rhamnose (0.8 mg,  $R_f = 0.65$ ,  $[\alpha]_D^{25} +18.0$ ).

For compound **6**: glucose (1.3 mg,  $R_f = 0.42$ ,  $[\alpha]_D^{25} +48.0$ ), arabinose (0.8 mg,  $R_f = 0.48$ ,  $[\alpha]_D^{25} +41.0$ ), rhamnose (0.9 mg,  $R_f = 0.65$ ,  $[\alpha]_D^{25} +18.0$ ).

For compound **7**: glucose (1.3 mg,  $R_f = 0.42$ ,  $[\alpha]_D^{25} +48.0$ ), arabinose (0.9 mg,  $R_f = 0.48$ ,  $[\alpha]_D^{25} +41.0$ ).

### **$\alpha$ -Glucosidase inhibitory assay**

The  $\alpha$ -glucosidase (G0660, Sigma-Aldrich, St. Louis, MO) enzyme inhibition assay was performed according to the previously described method. In brief, 20  $\mu$ L of sample solution and 40  $\mu$ L of  $\alpha$ -glucosidase solution were well mixed with 100  $\mu$ L of 0.1 M phosphate buffer (pH 7.0) in a 96-well plate. After 5 min pre-incubation at 37 °C, the substrate, *p*-nitrophenyl- $\alpha$ -D-glucopyranoside solution (40  $\mu$ L) was added, and the reaction mixture was incubated at 37 °C for 30 min. The absorbance of was then measured at 405 nm by using an ELISA Bio-Rad microplate reader. Reaction mixture containing acarbose solution instead of sample solution was used as positive control. And reaction mixture containing buffer solution instead of sample solution was used as negative control.

### **$\alpha$ -Amylase inhibitory assay**

The  $\alpha$ -amylase (A3176, Sigma-Aldrich, St. Louis, MO) enzyme inhibitory activity was measured using the reported method. Substrate was prepared by boiling 100 mg potato starch in 5 mL phosphate buffer (pH 7.0) for 5 min, then cooling to room temperature. The sample solution (20  $\mu$ L) and substrate (30  $\mu$ L) were mixed with 30  $\mu$ L of 0.1 M phosphate buffer (pH 7.0). After 5 min pre-incubation, 20  $\mu$ L of  $\alpha$ -amylase solution was added and the reaction mixture was incubated at 37°C for 15 min. The reaction was stopped by adding 50  $\mu$ L HCl 1 M and then 50  $\mu$ L iodine solution. The absorbances were then measured at 650 nm by a microplate reader. Reaction mixture containing acarbose solution instead of sample solution was used as positive control. And reaction mixture containing buffer solution instead of sample solution was used as negative control.

Table S1. The  $\alpha$ -glucosidase and  $\alpha$ -amylase inhibitory effects of the compounds **1-13** (200  $\mu$ M)

| Comp.            | $\alpha$ -glucosidase inhibition (%) |      | $\alpha$ -amylase inhibition (%) |      |
|------------------|--------------------------------------|------|----------------------------------|------|
|                  | Mean                                 | SD   | Mean                             | SD   |
| <b>1</b>         | 94.65                                | 2.19 | 88.29                            | 2.50 |
| <b>2</b>         | 82.25                                | 1.87 | 85.03                            | 1.84 |
| <b>3</b>         | 84.26                                | 1.59 | 92.42                            | 1.86 |
| <b>4</b>         | 81.48                                | 2.42 | 91.11                            | 2.51 |
| <b>5</b>         | 64.73                                | 2.64 | 31.91                            | 1.72 |
| <b>6</b>         | 60.81                                | 2.37 | 64.46                            | 1.80 |
| <b>7</b>         | 55.34                                | 1.38 | 44.92                            | 2.94 |
| <b>8</b>         | 92.68                                | 1.12 | 94.22                            | 1.57 |
| <b>9</b>         | 90.95                                | 1.23 | 83.88                            | 2.25 |
| <b>10</b>        | 67.98                                | 1.20 | 48.04                            | 2.32 |
| <b>11</b>        | 53.62                                | 1.15 | 62.71                            | 2.06 |
| <b>12</b>        | 46.36                                | 2.36 | 69.74                            | 2.20 |
| <b>13</b>        | 42.20                                | 2.70 | 57.38                            | 2.64 |
| <b>Acarbose*</b> | 84.05                                | 2.58 | 61.23                            | 2.15 |

[\*]Acarbose was used as a positive control (at 100  $\mu$ g/mL ~ 155  $\mu$ M). Experiments were performed in triplicate.

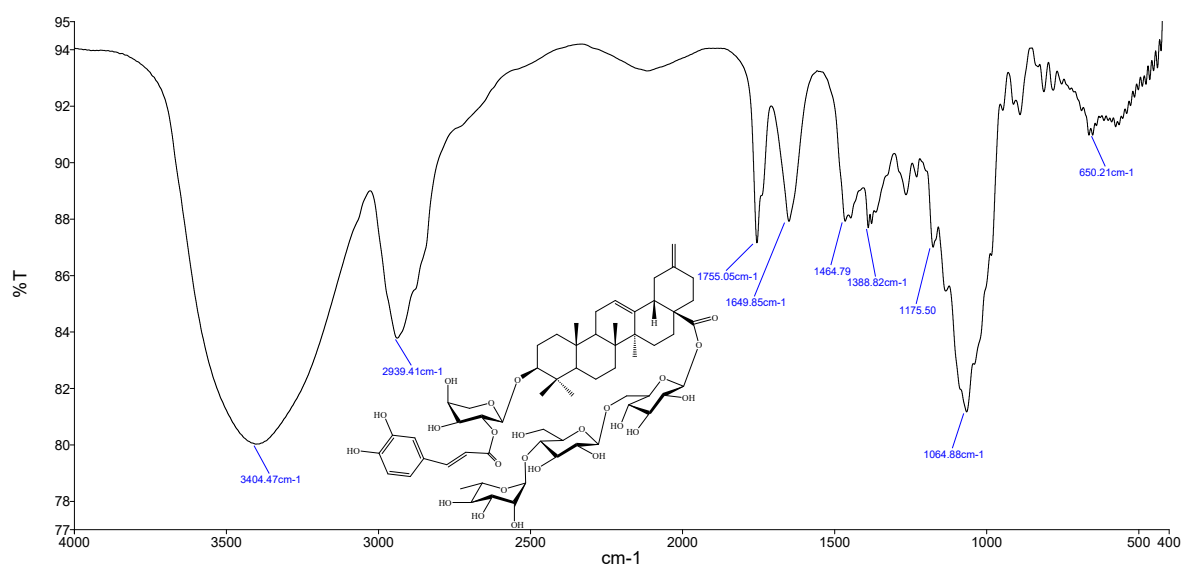

Figure S1. IR spectrum of compound 1

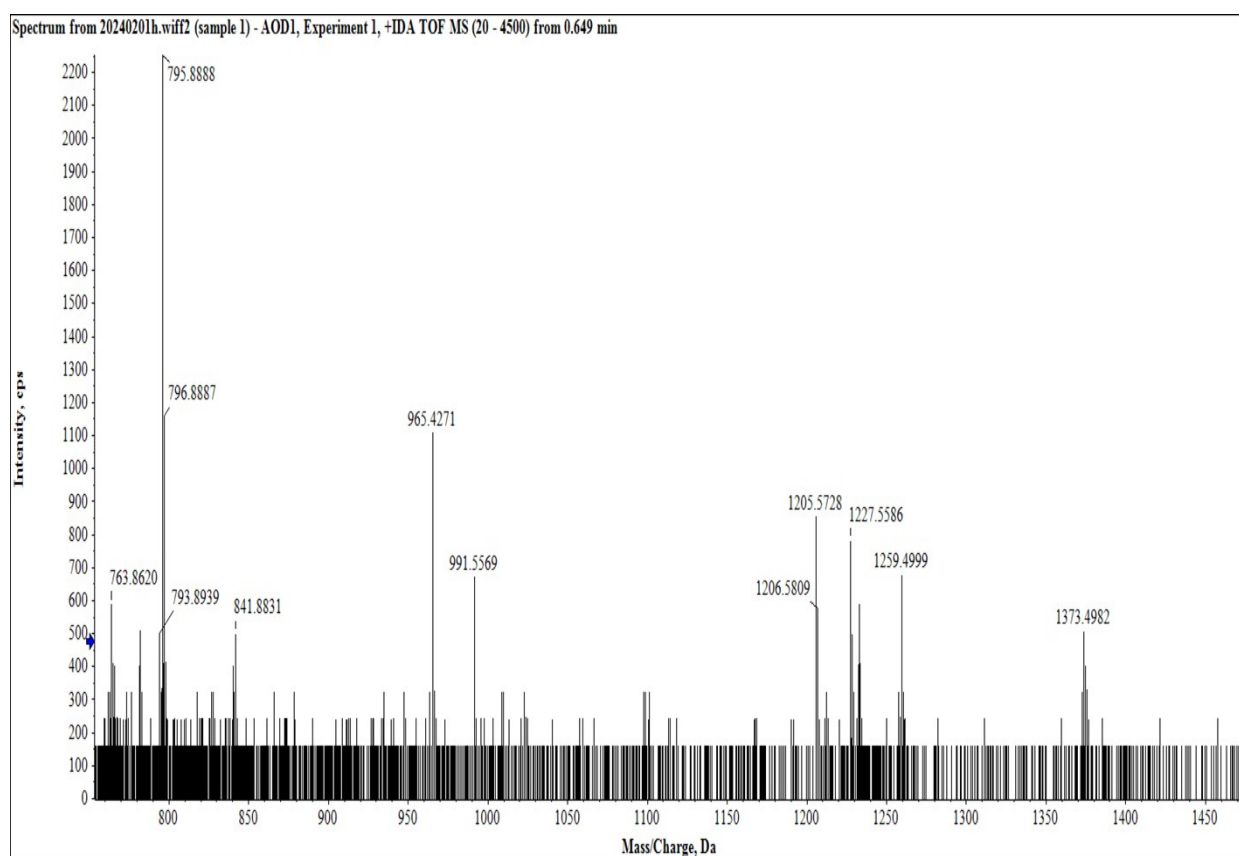

HR-ESI-MS  $m/z$ : 1227.5586  $[M+Na]^+$ , (calcd. for  $[C_{61}H_{88}O_{24}Na]^+$ , 1227.5558,  $\Delta=+2.3$  ppm);  $m/z$ : 1205.5728  $[M+H]^+$ , (calcd. for  $[C_{61}H_{89}O_{24}]^+$ , 1205.5739,  $\Delta=-0.9$  ppm).

Figure S2. HR-ESI-MS of compound 1

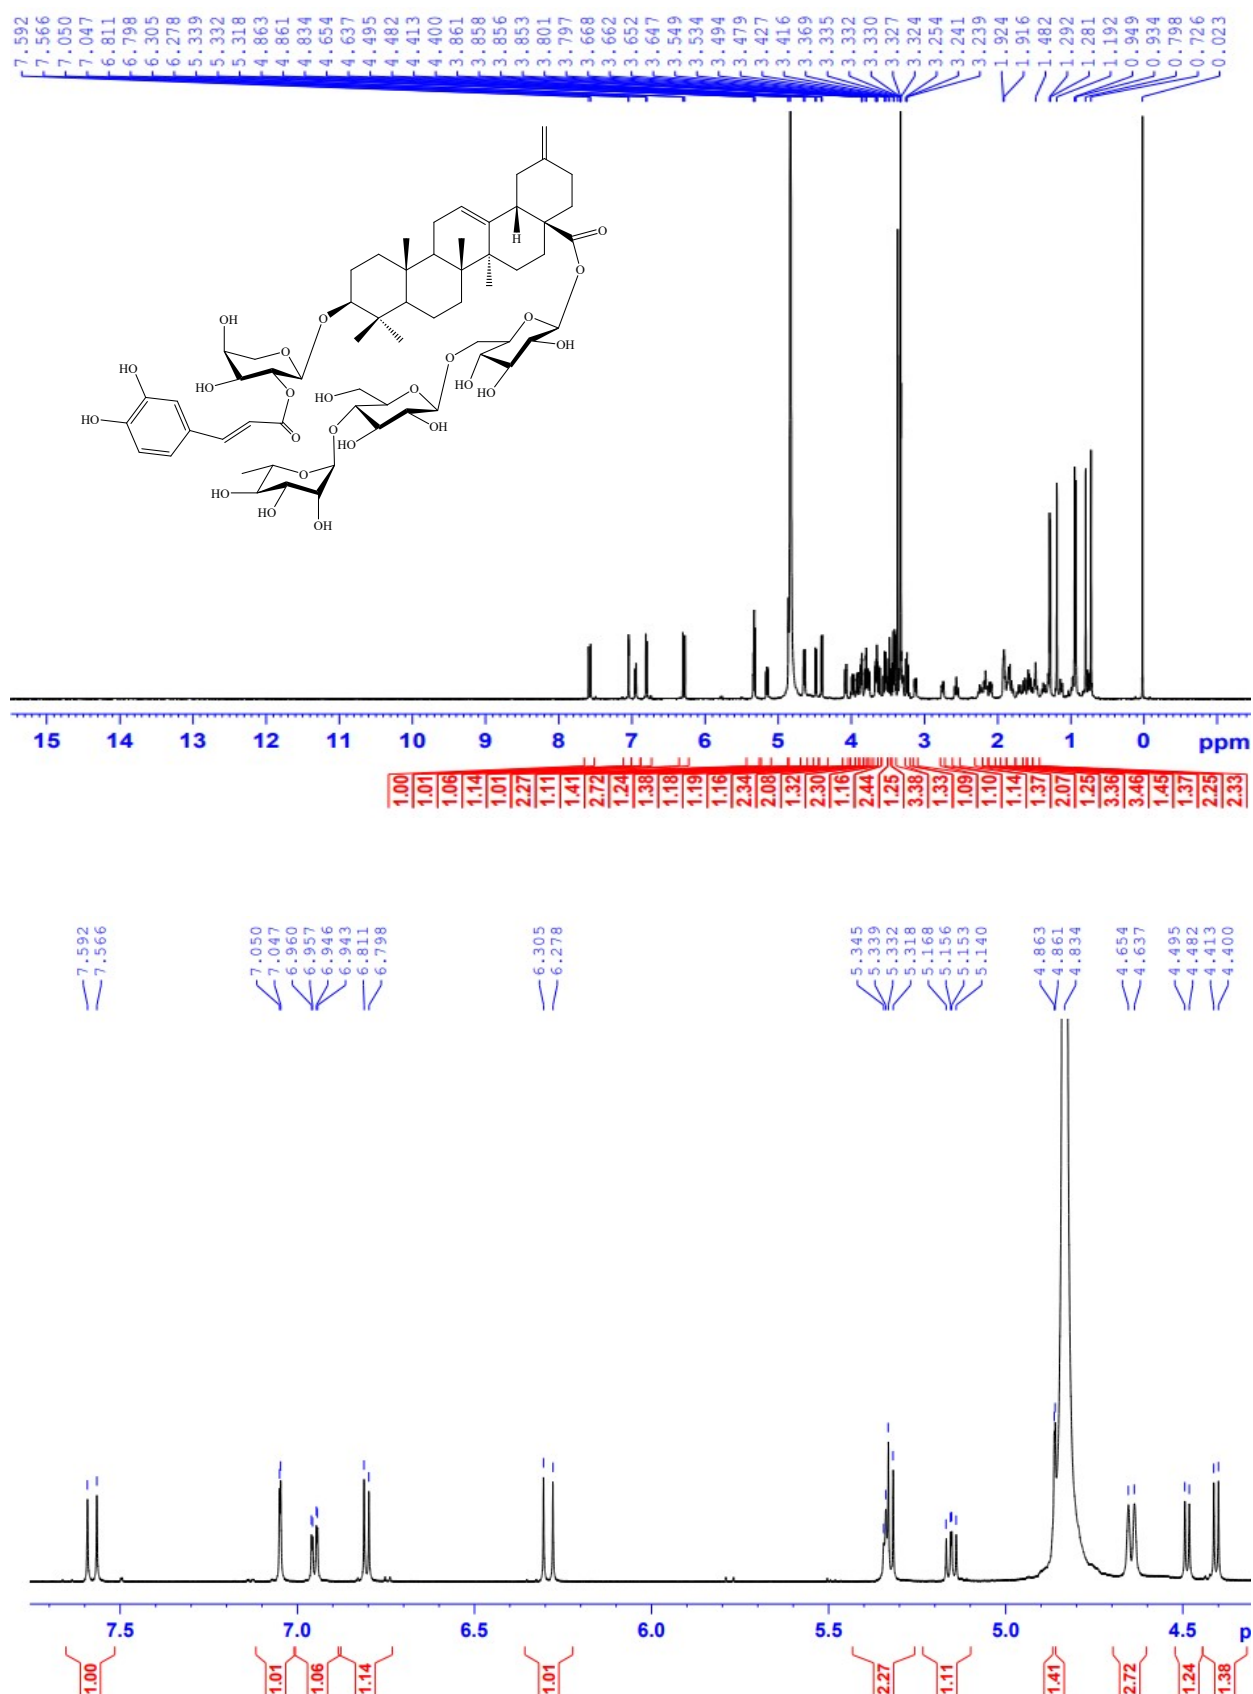

Figure S3. <sup>1</sup>H-NMR spectrum of compound 1 in CD<sub>3</sub>OD

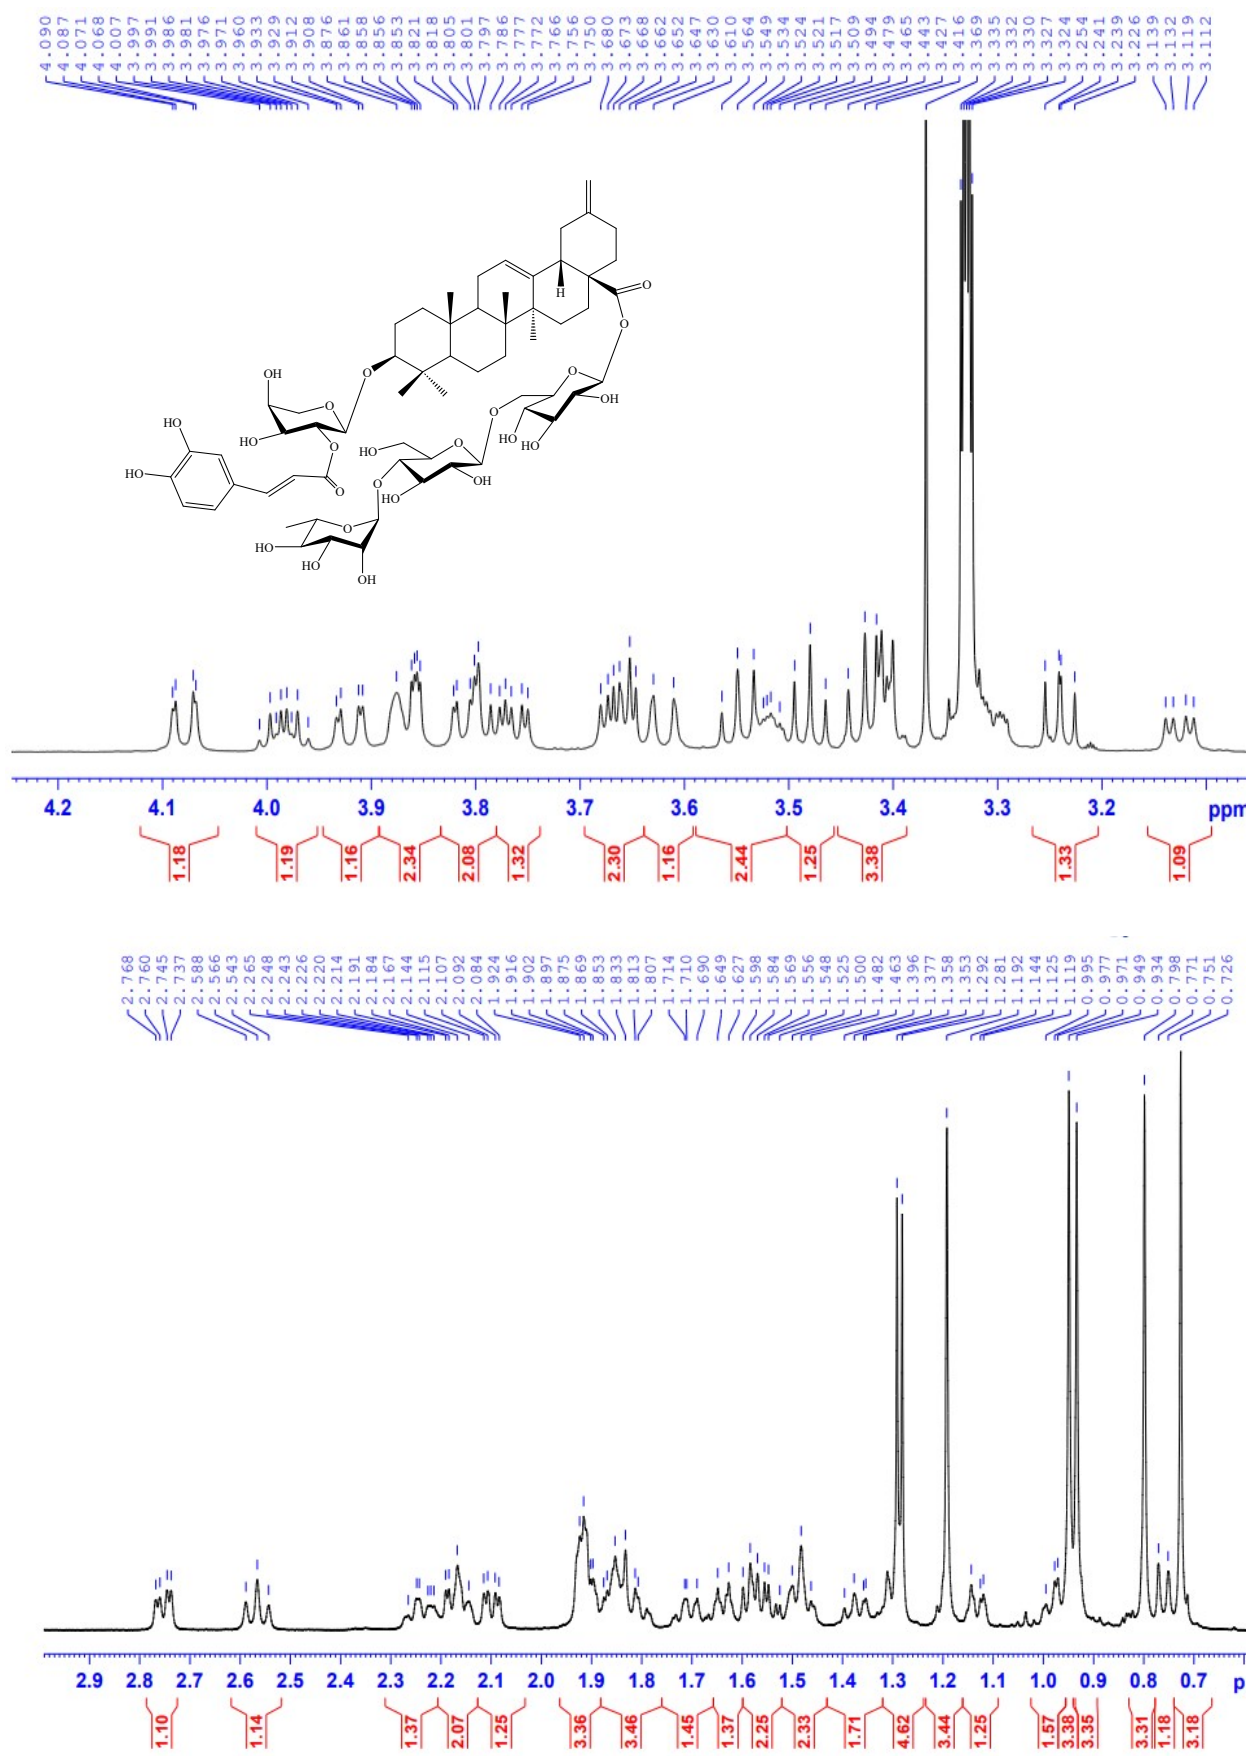

Figure S4. Extended  $^1\text{H}$ -NMR spectrum of compound 1 in  $\text{CD}_3\text{OD}$

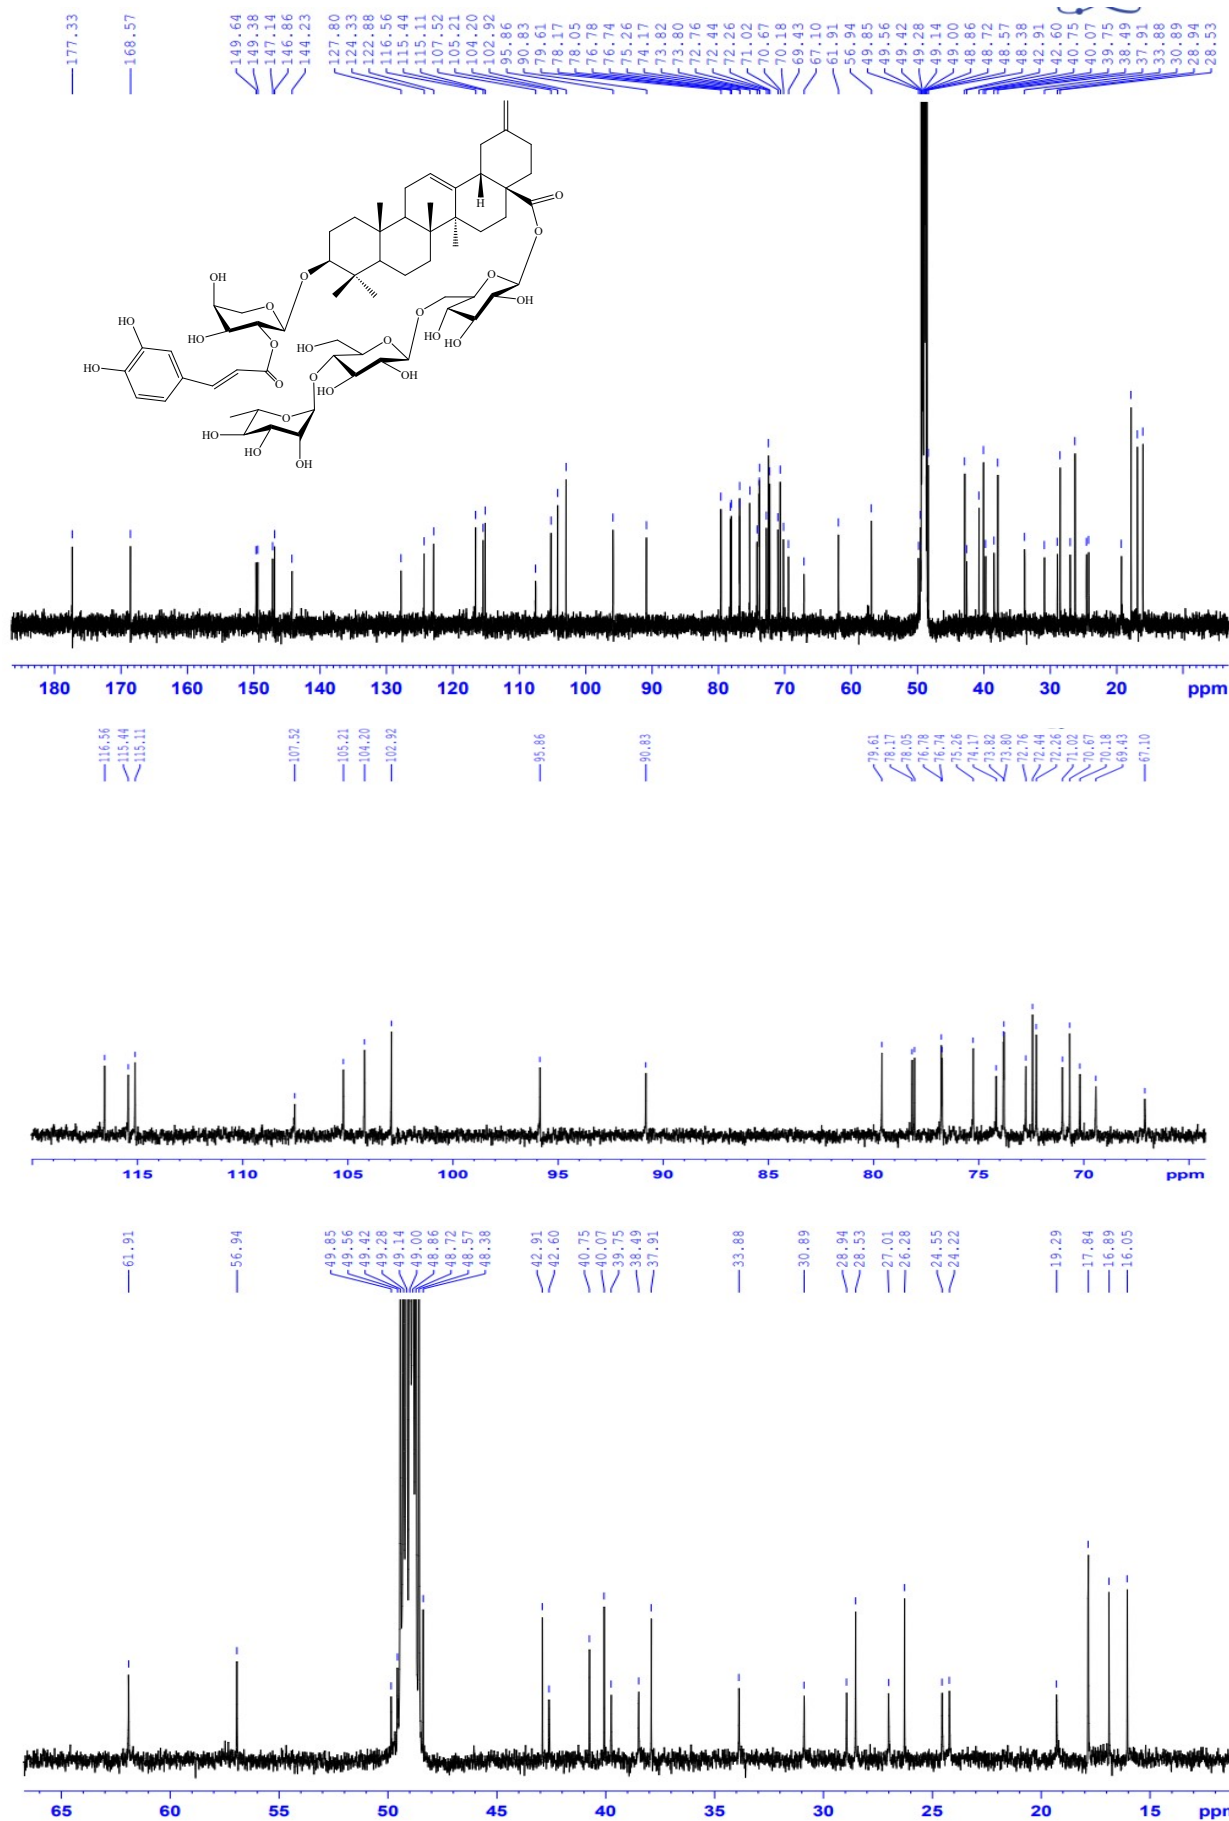

Figure S5.  $^{13}\text{C}$ -NMR spectrum of compound 1 in  $\text{CD}_3\text{OD}$

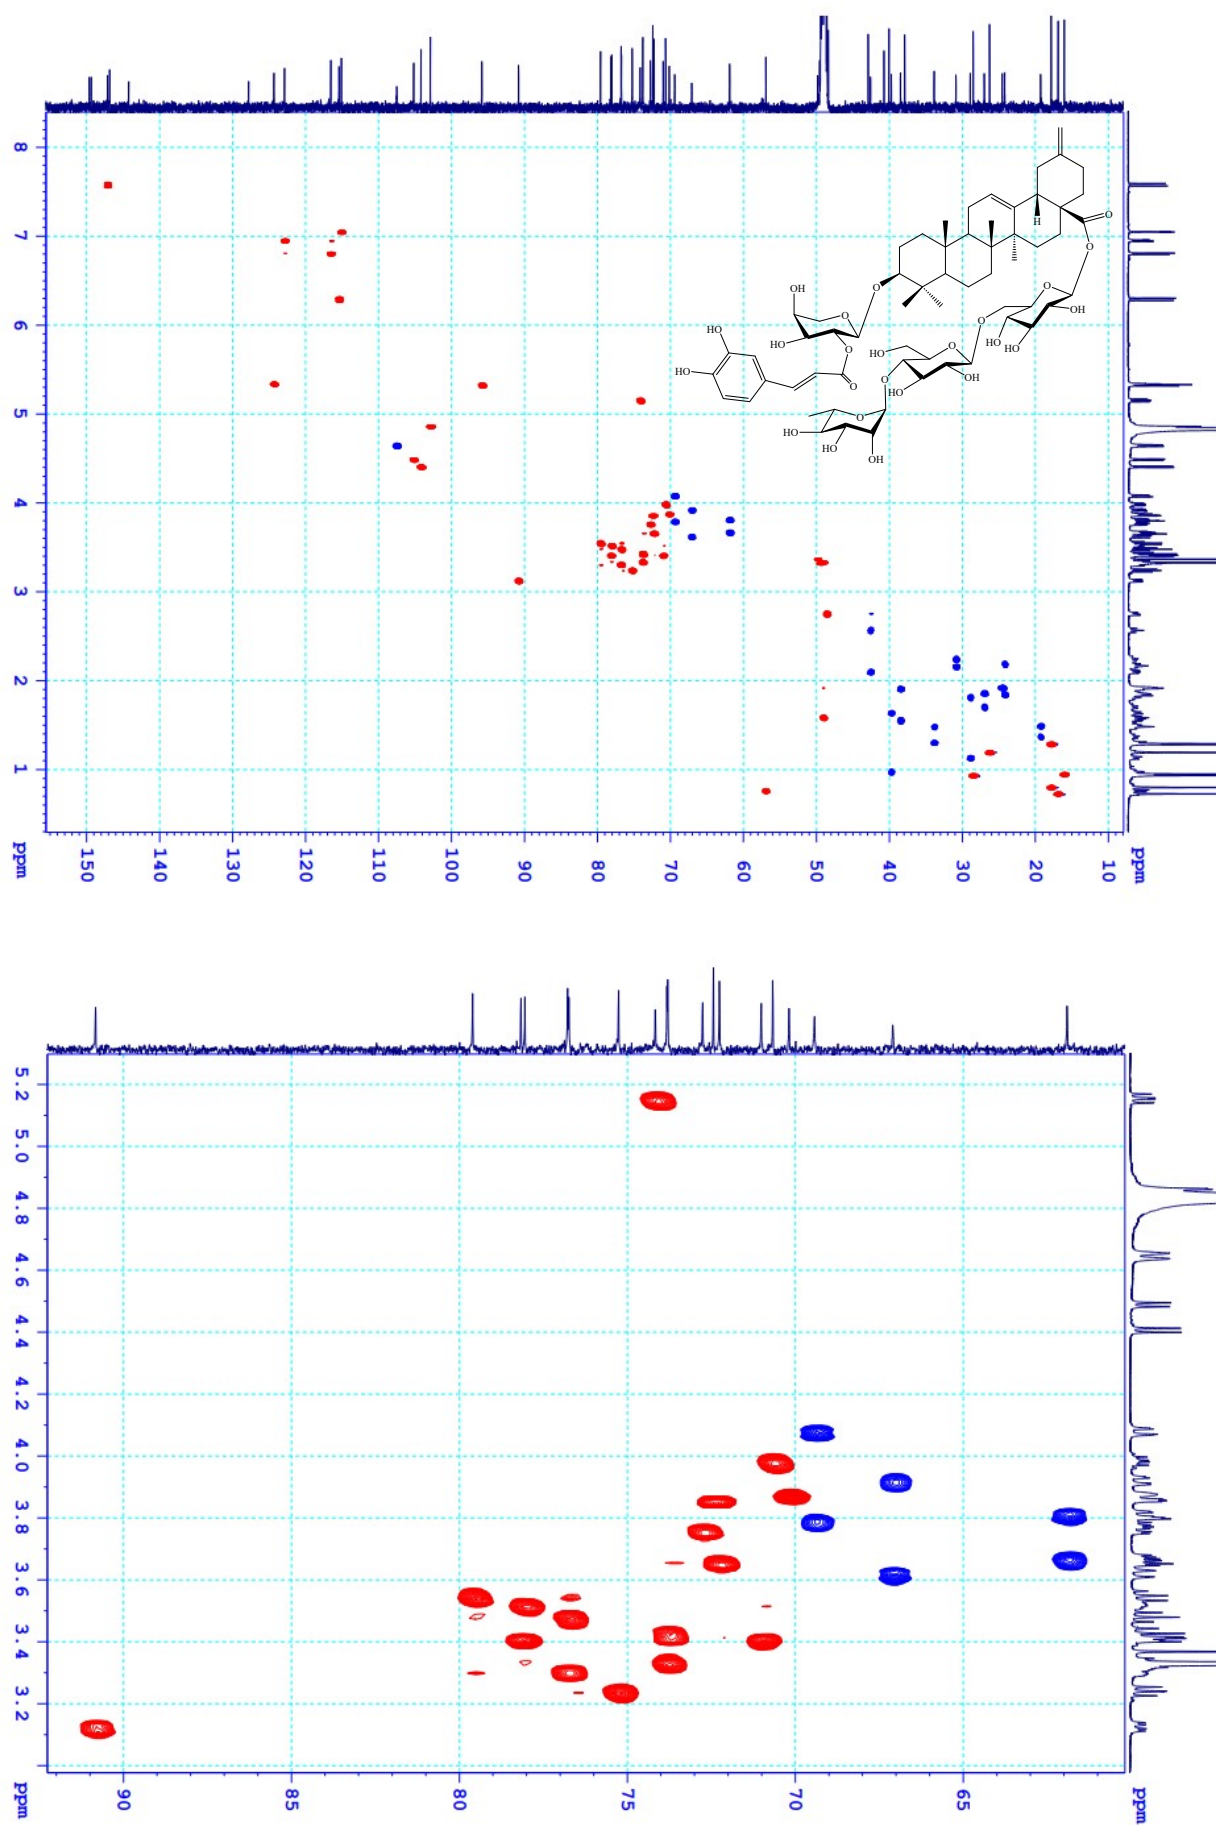

Figure S6. HSQC spectrum of compound **1** in CD<sub>3</sub>OD

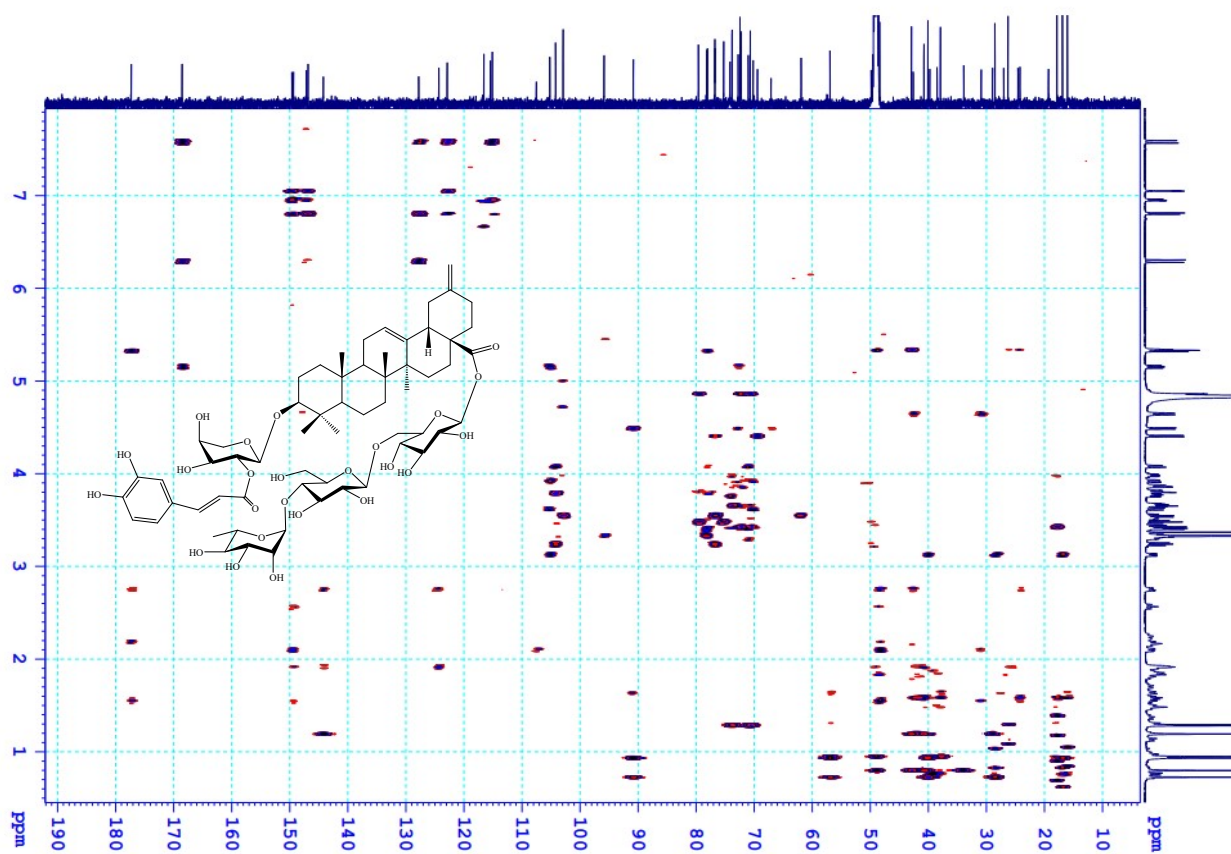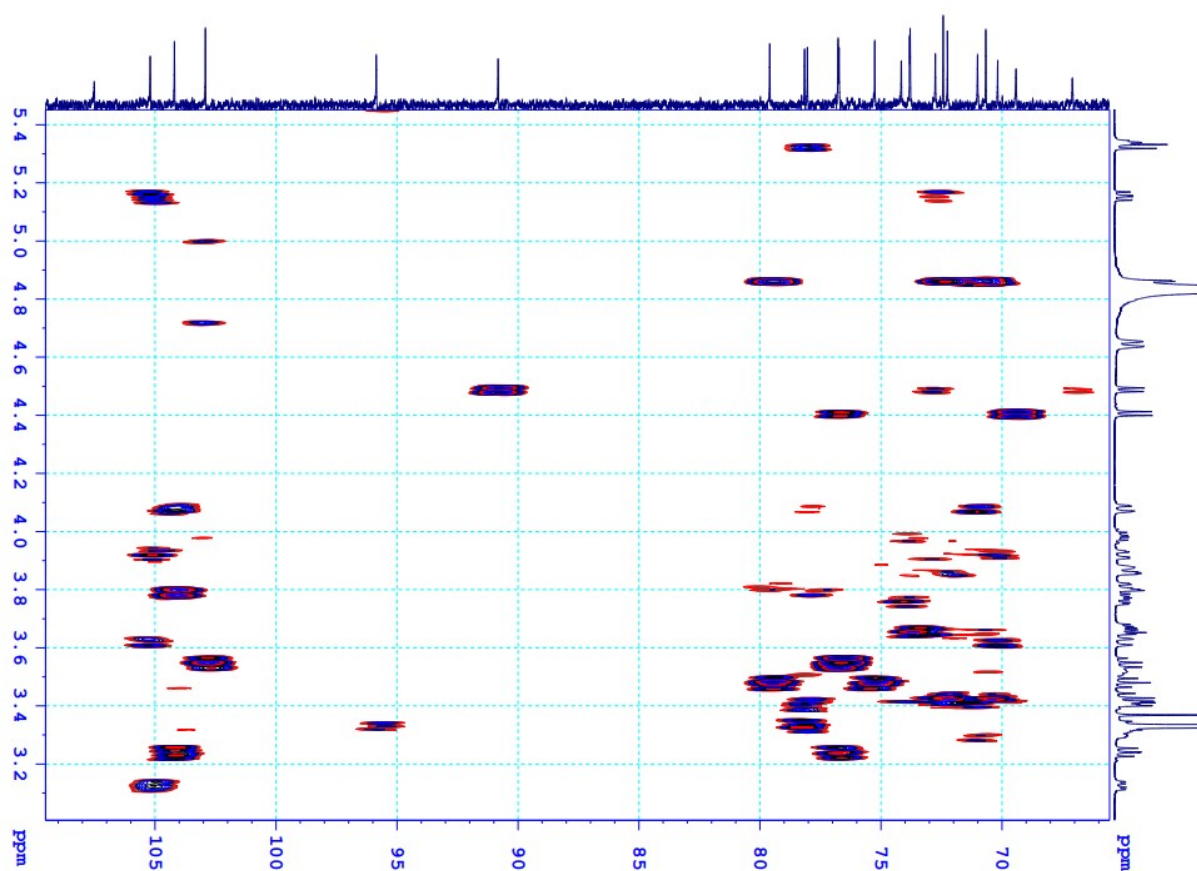

Figure S7. HMBC spectrum of compound **1** in CD<sub>3</sub>OD

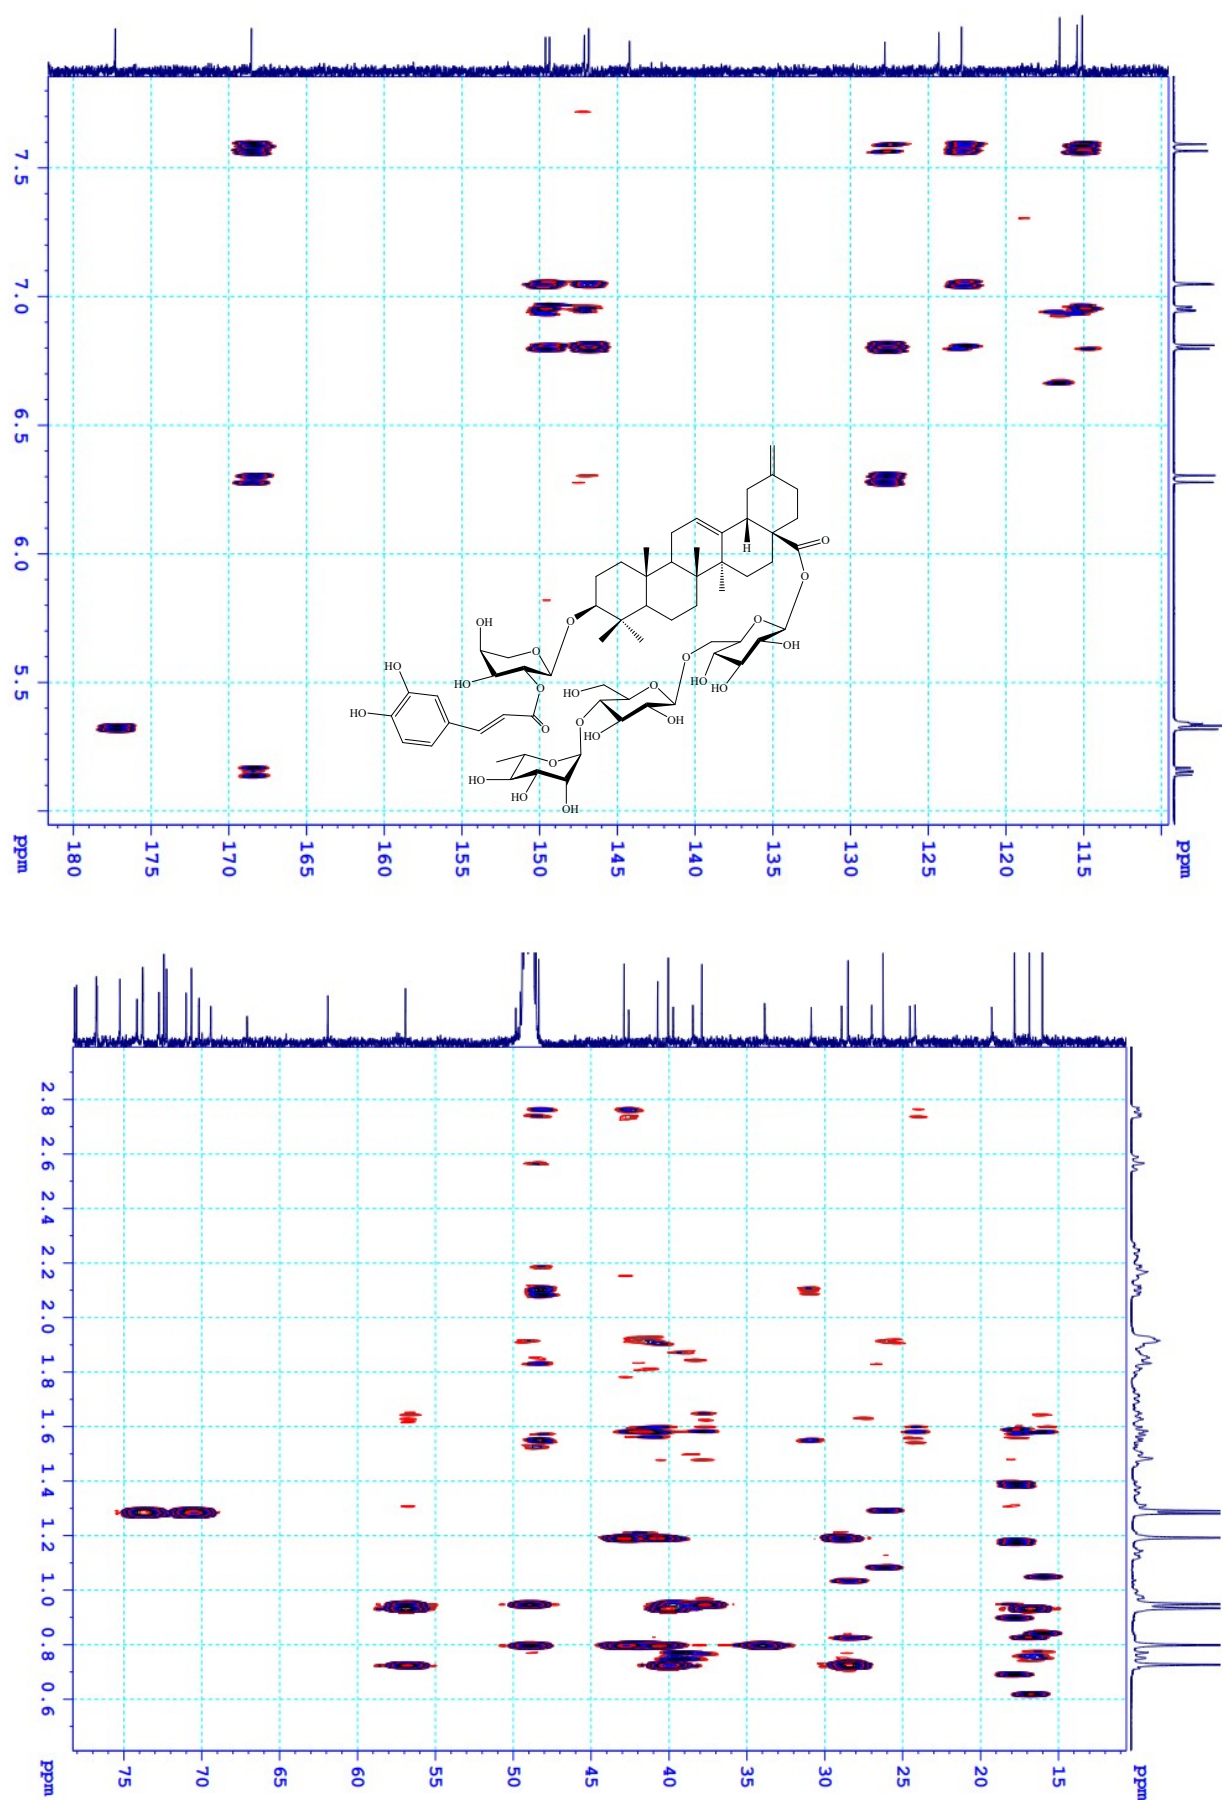

Figure S8. Expanded HMBC spectrum of compound **1** in CD<sub>3</sub>OD

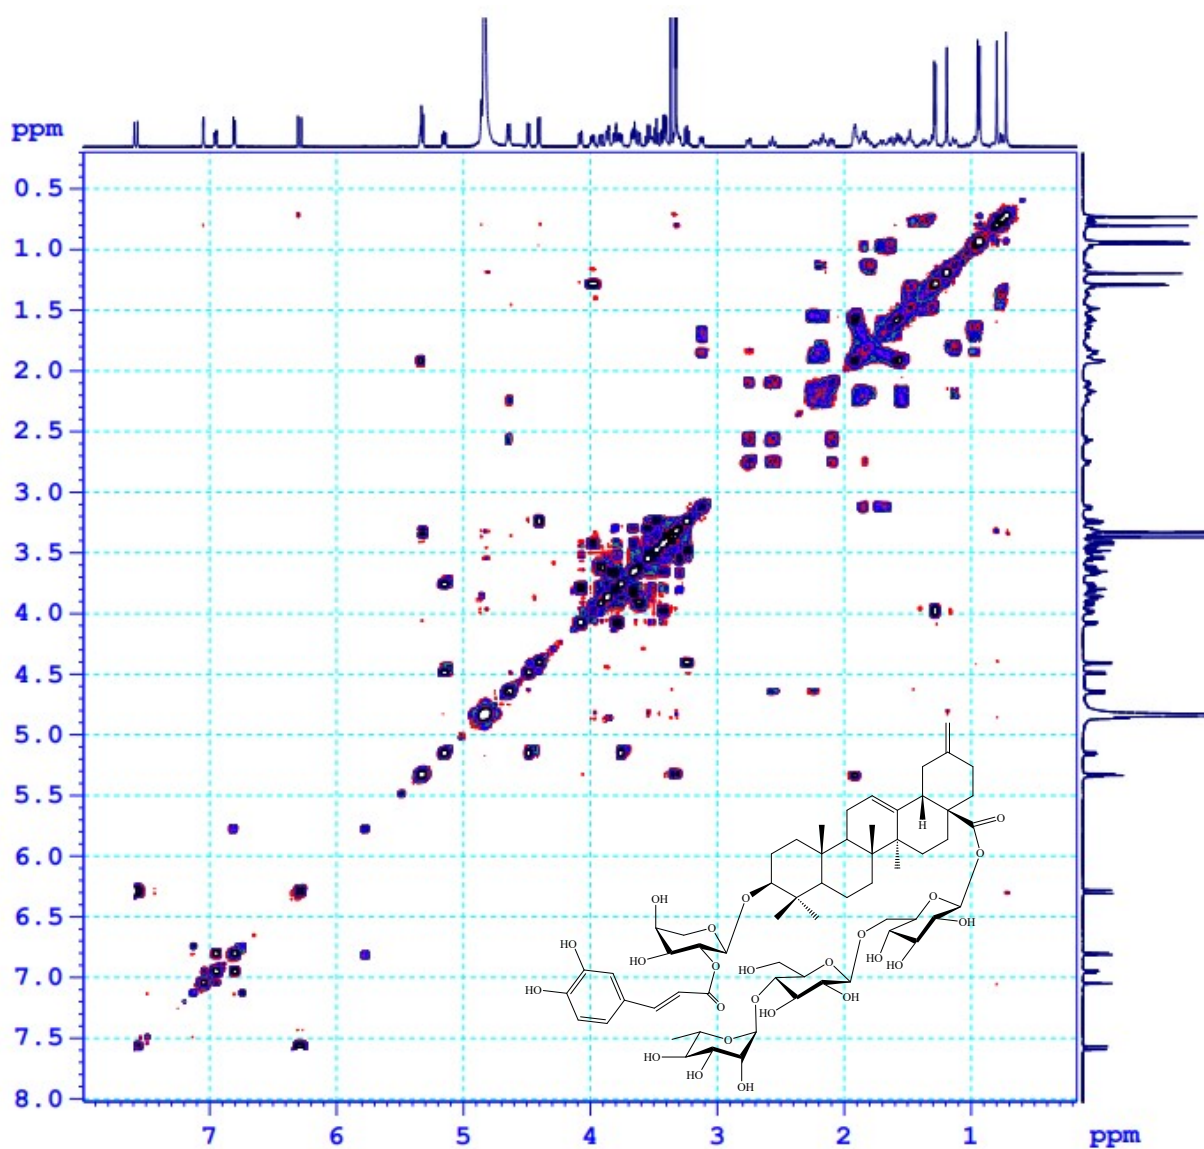

Figure S9. COSY spectrum of compound 1 in CD<sub>3</sub>OD

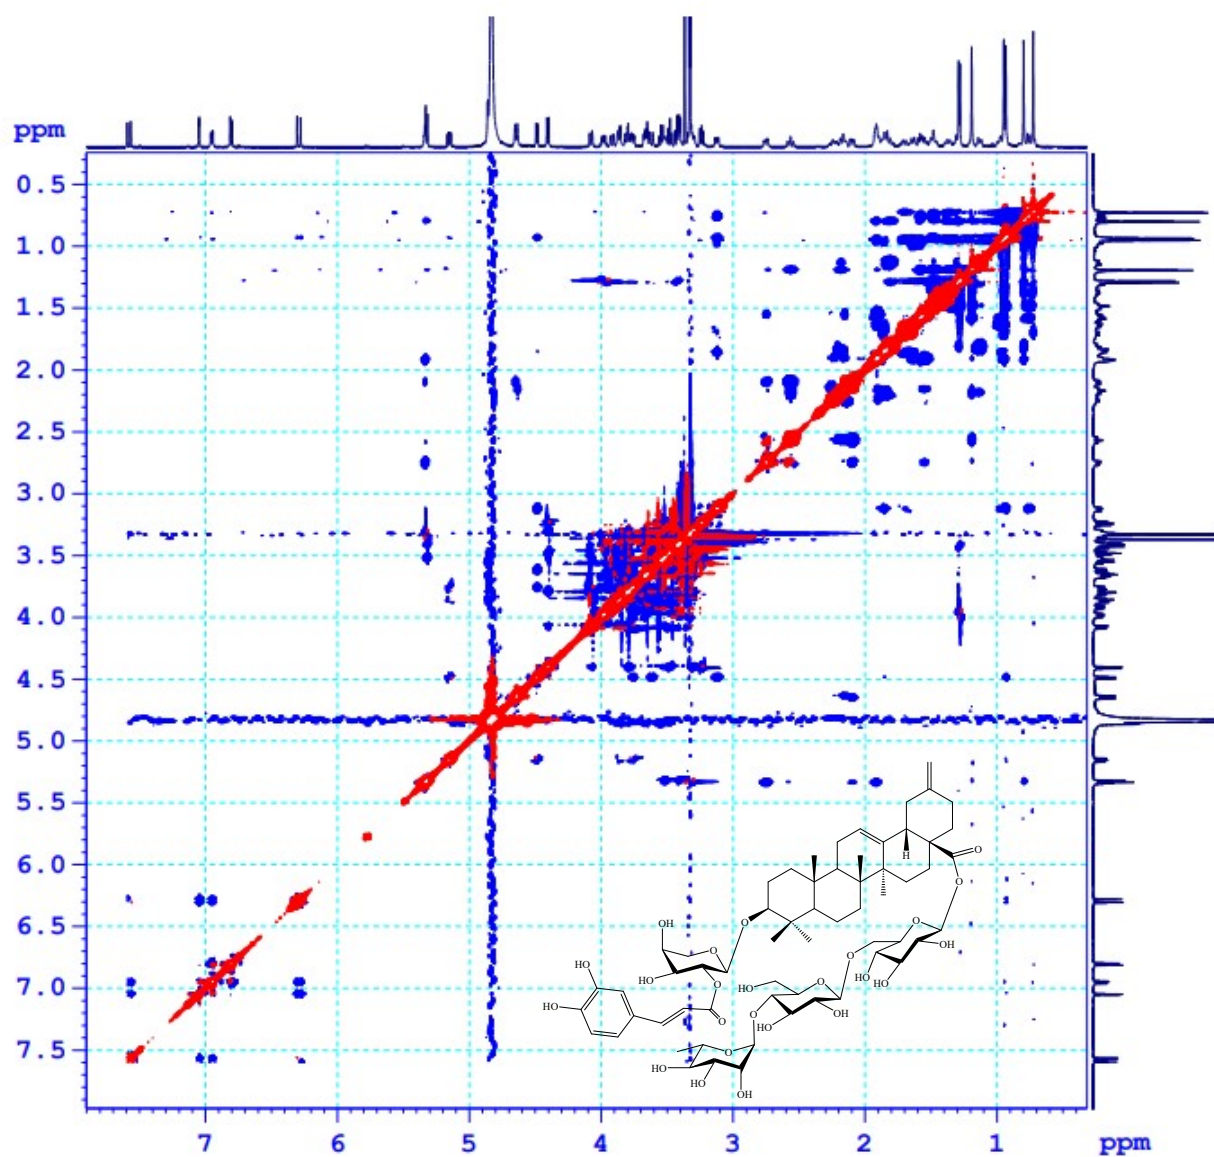

Figure S10. NOESY spectrum of compound **1** in CD<sub>3</sub>OD

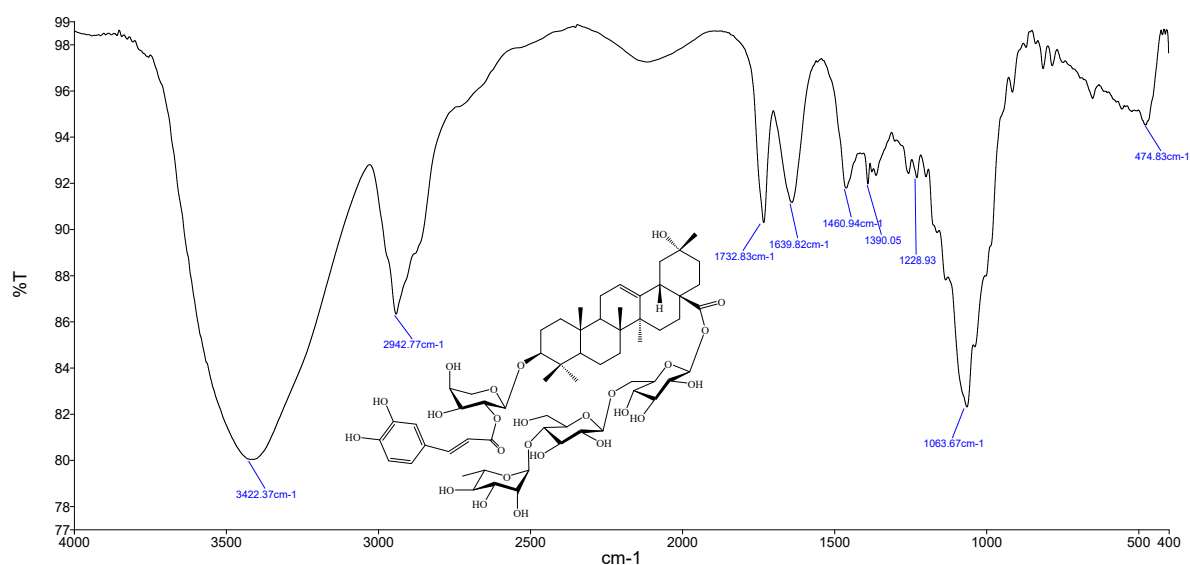

Figure S11. IR spectrum of compound **2**

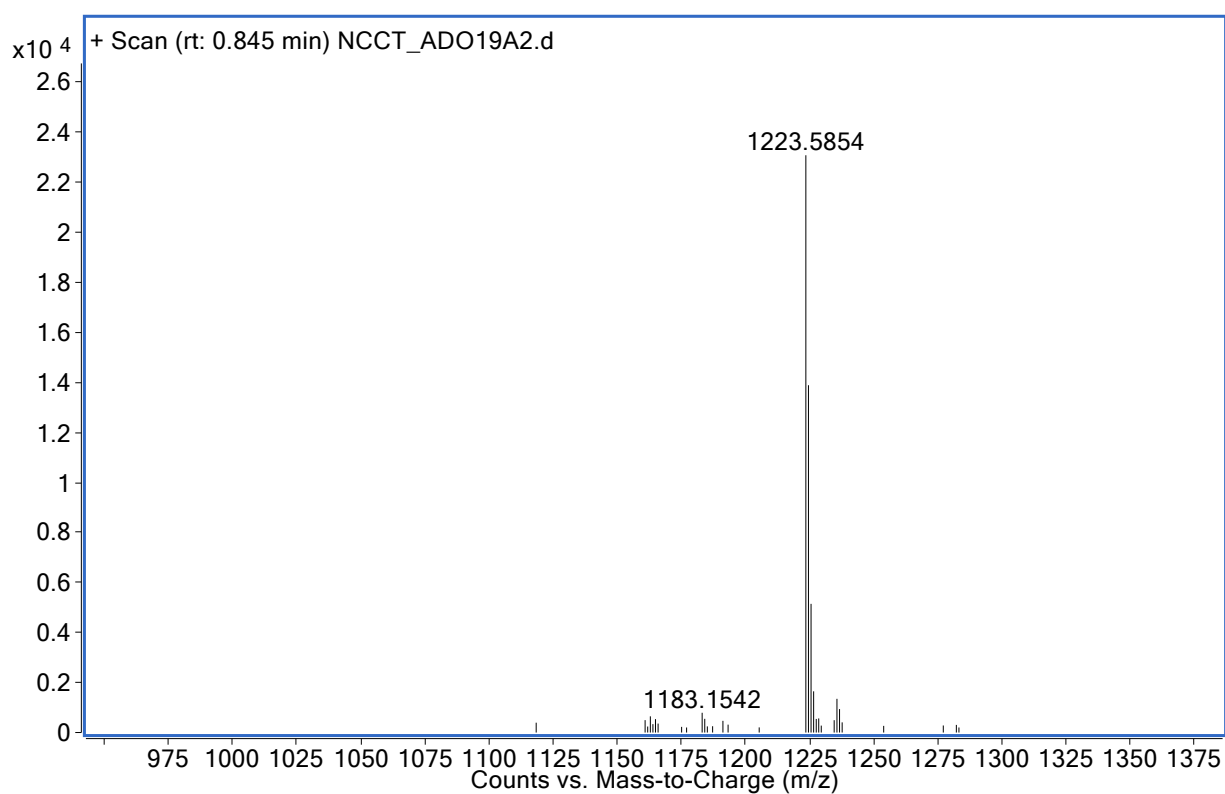

Figure S12. HR-ESI-MS of compound **2**

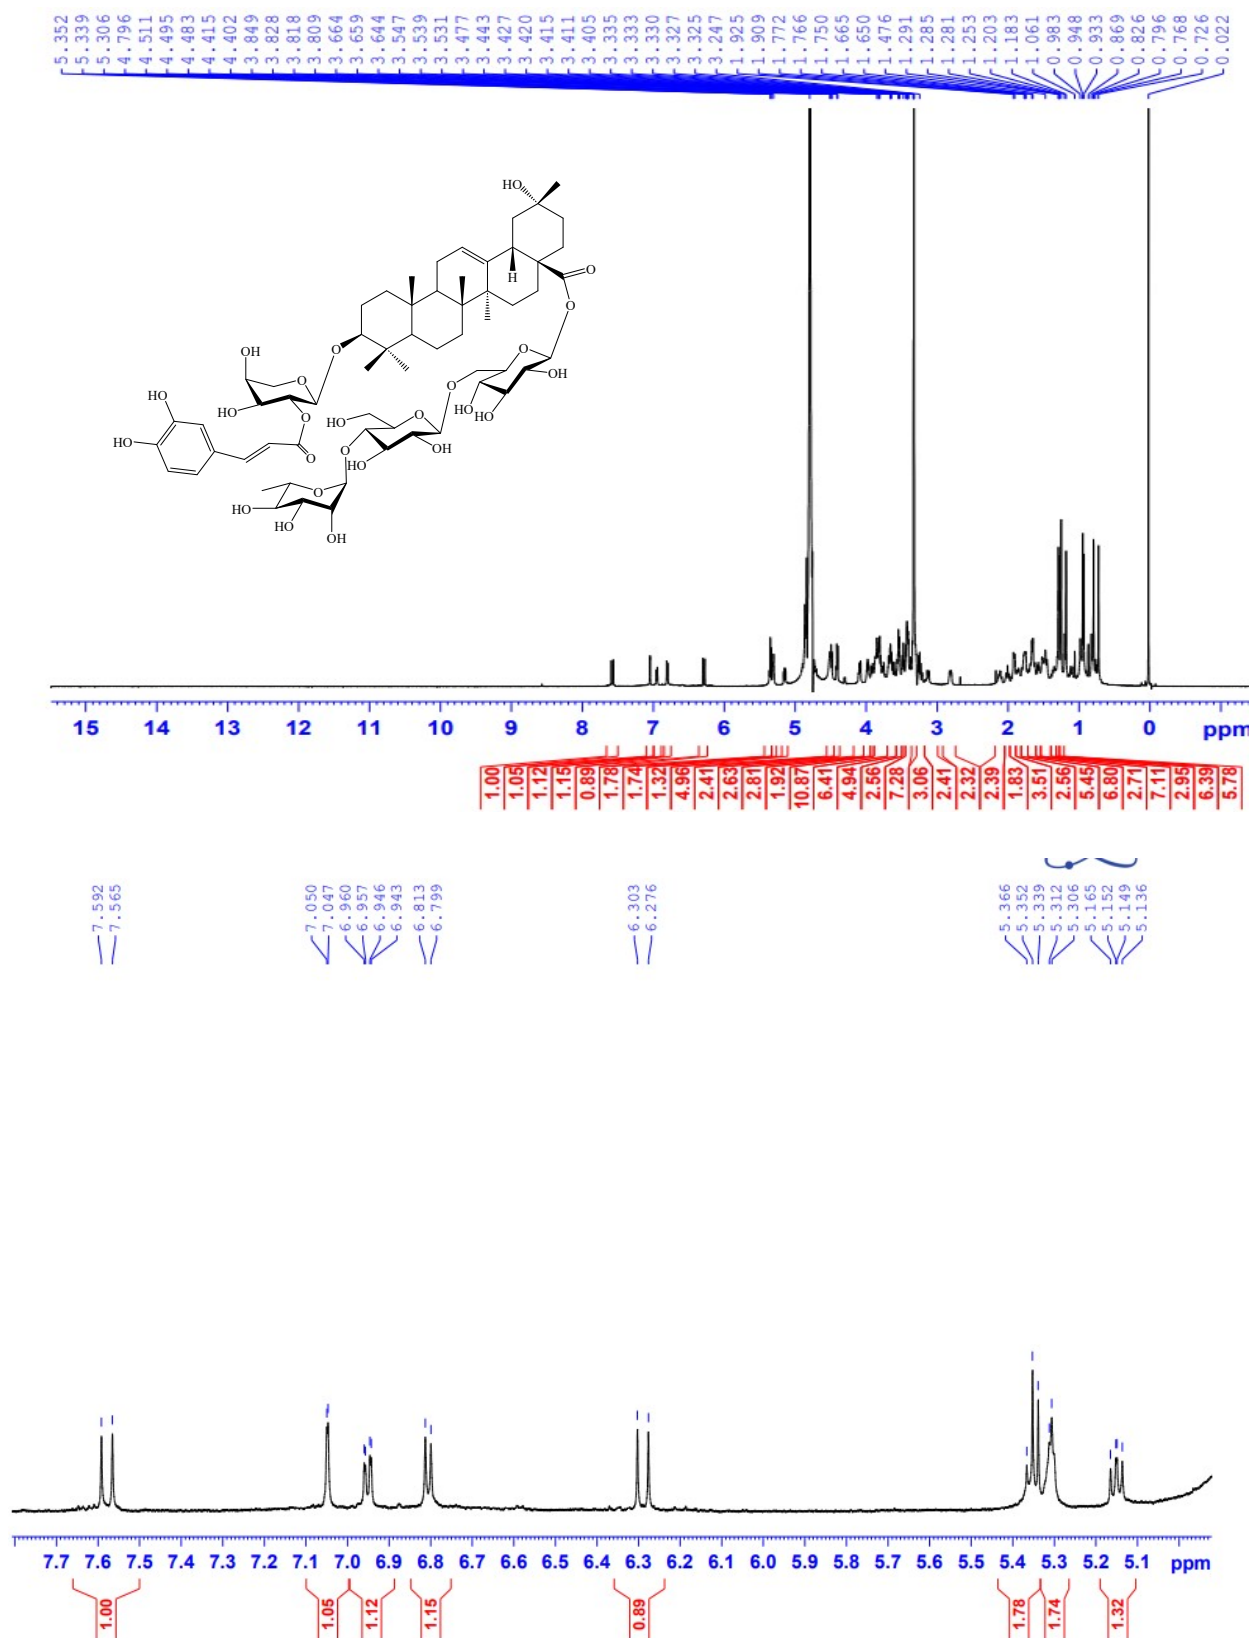

Figure S13.  $^1\text{H}$ -NMR spectrum of compound **2** in  $\text{CD}_3\text{OD}$

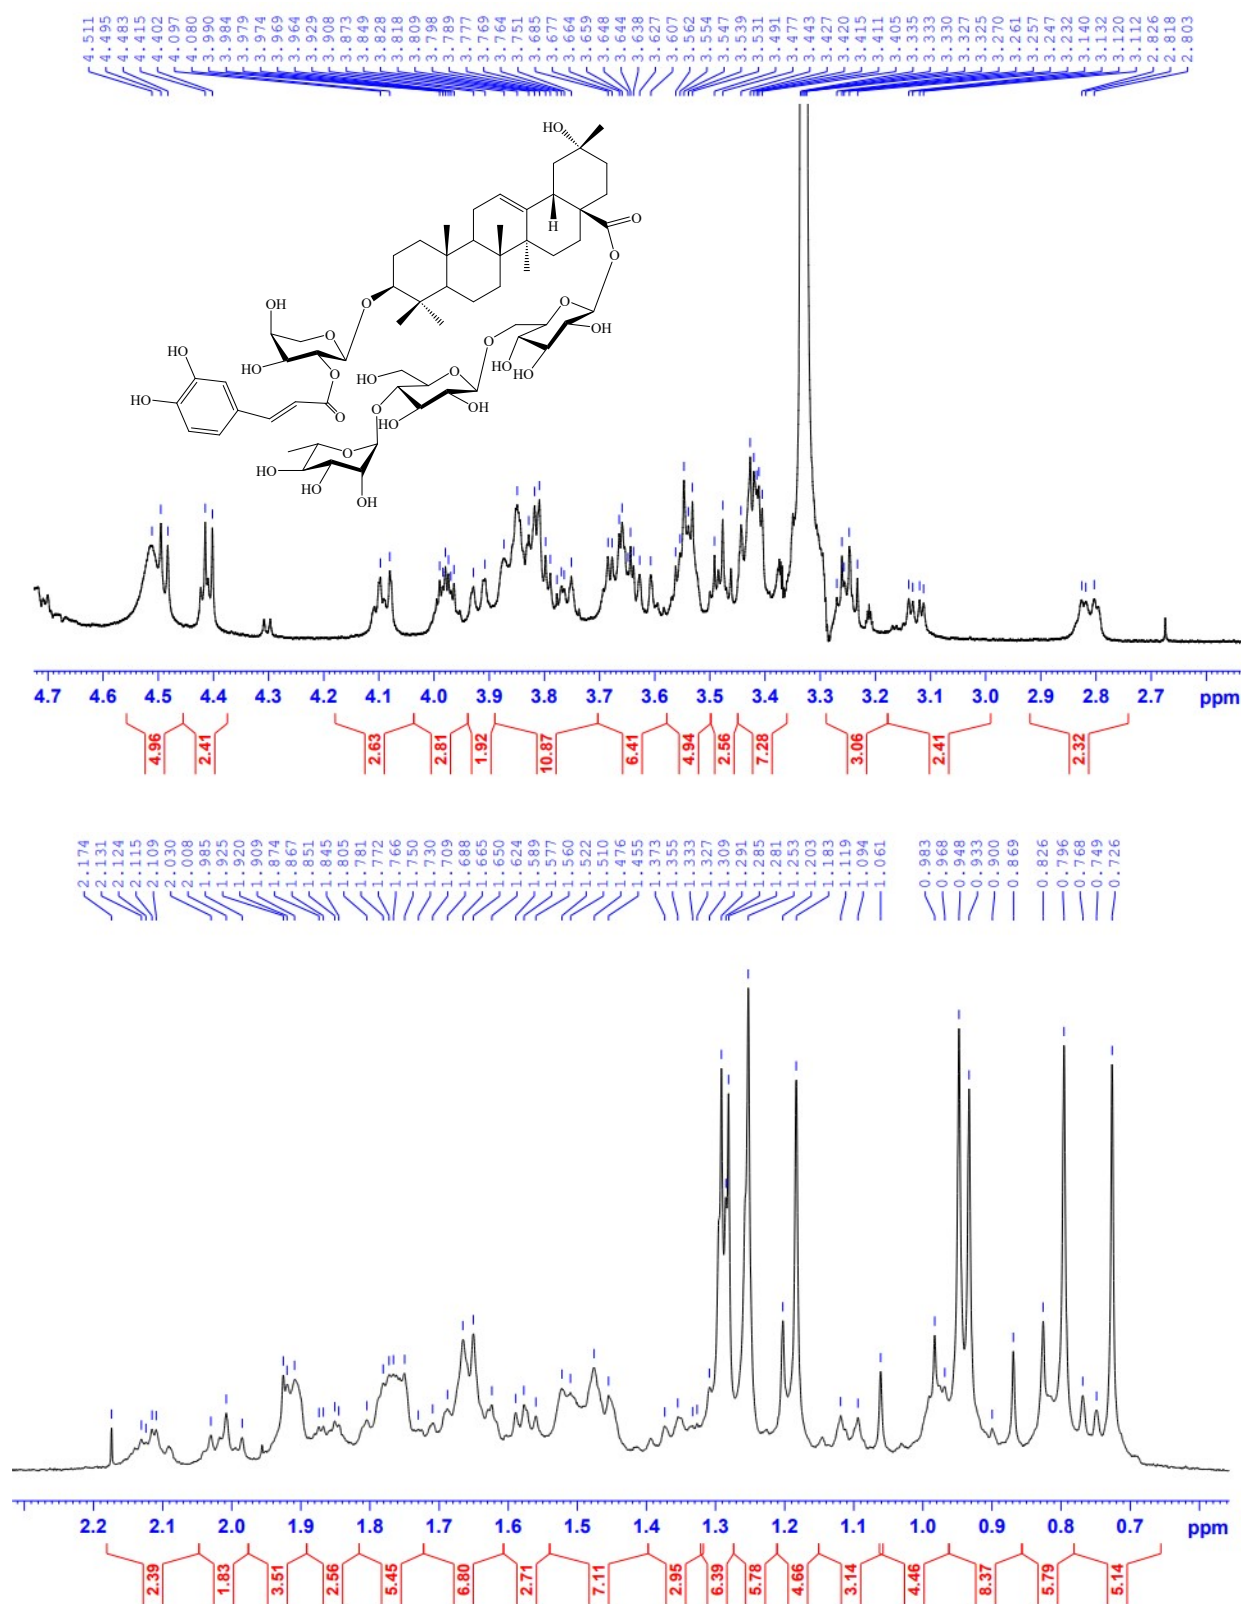

Figure S14. Extended  $^1\text{H}$ -NMR spectrum of compound 2 in  $\text{CD}_3\text{OD}$

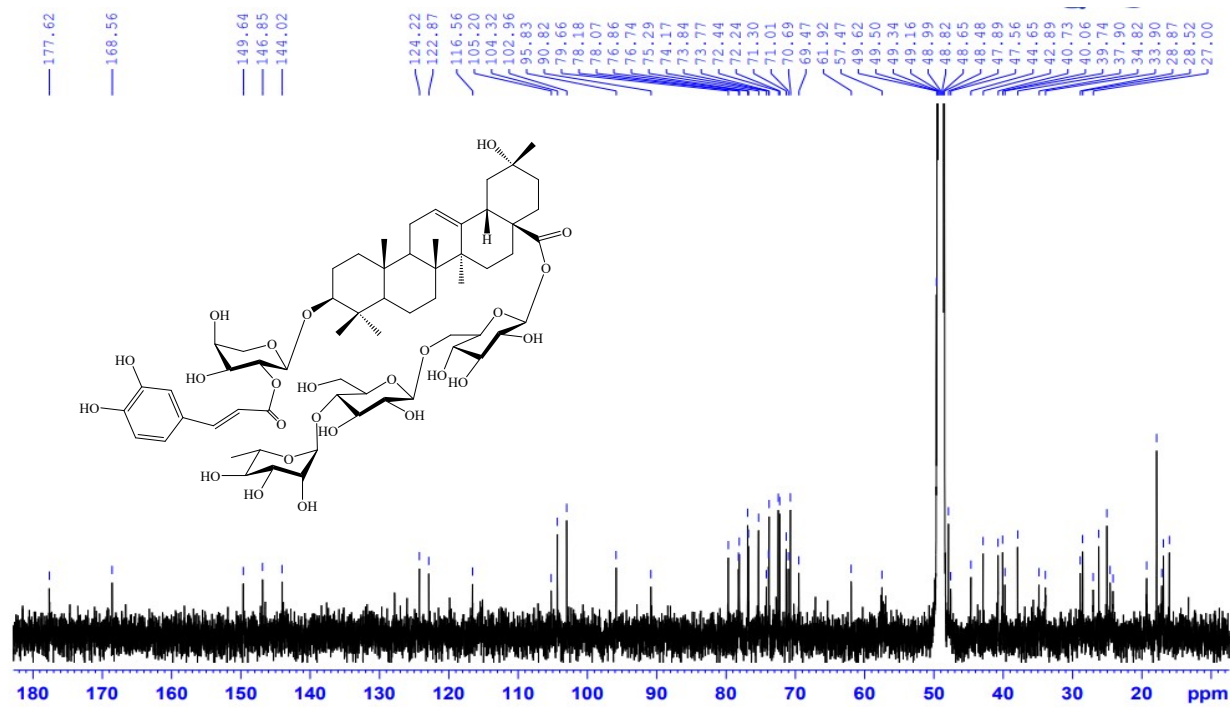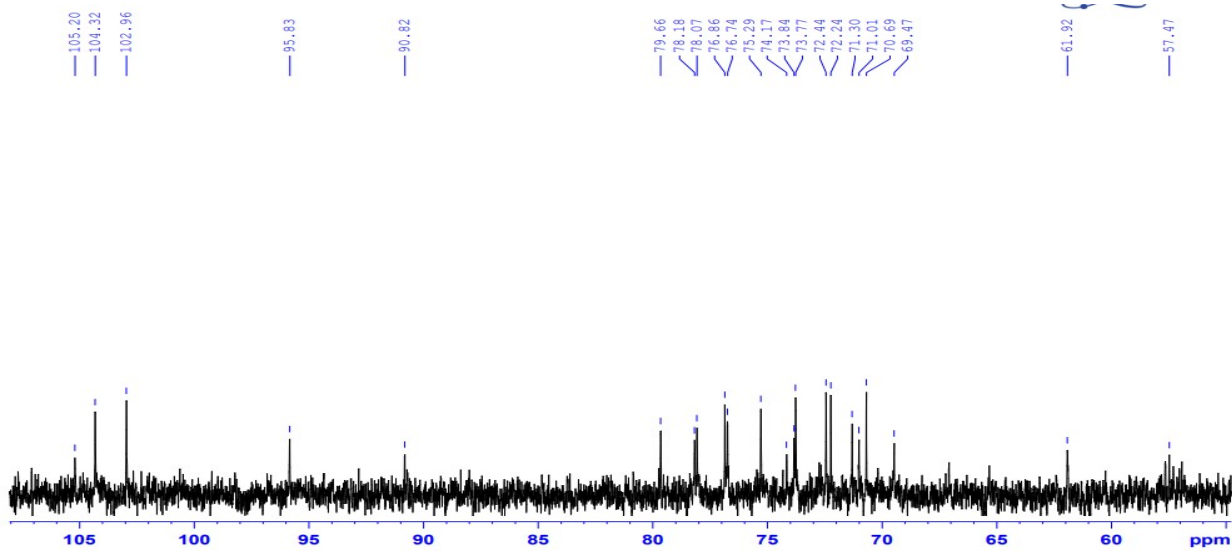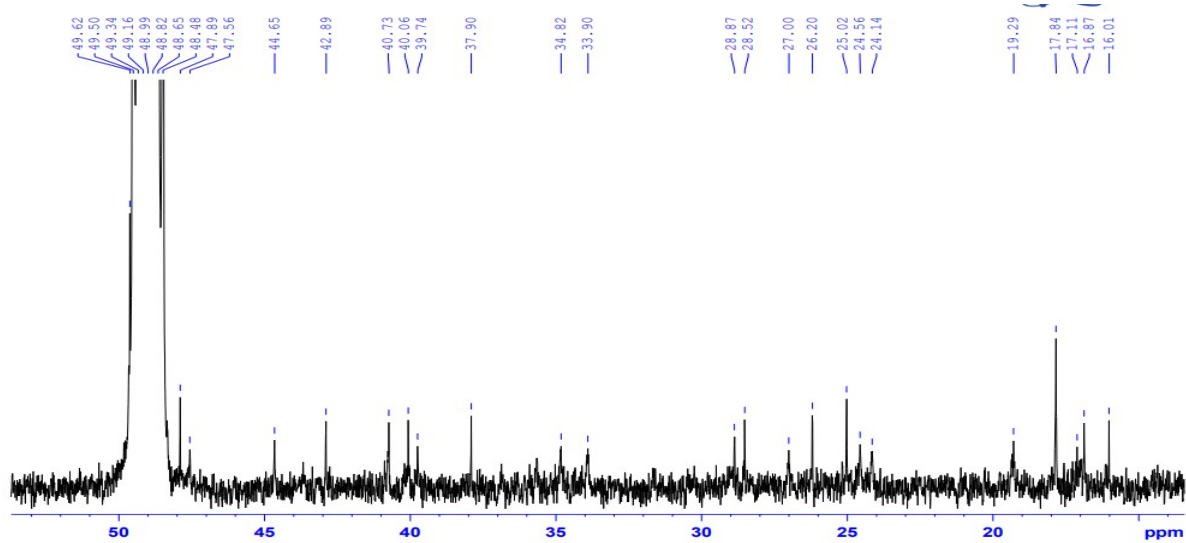

Figure S15.  $^{13}\text{C}$ -NMR spectrum of compound **2** in  $\text{CD}_3\text{OD}$

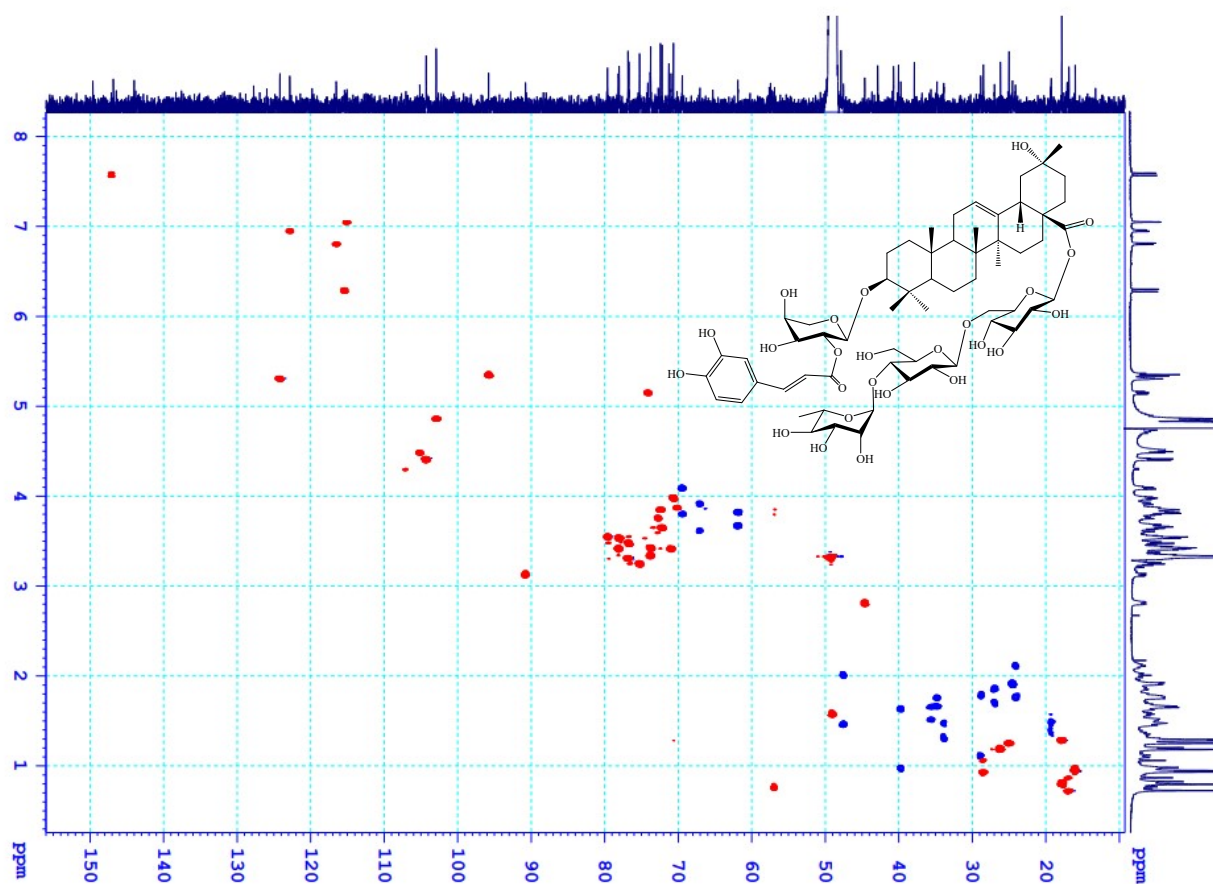

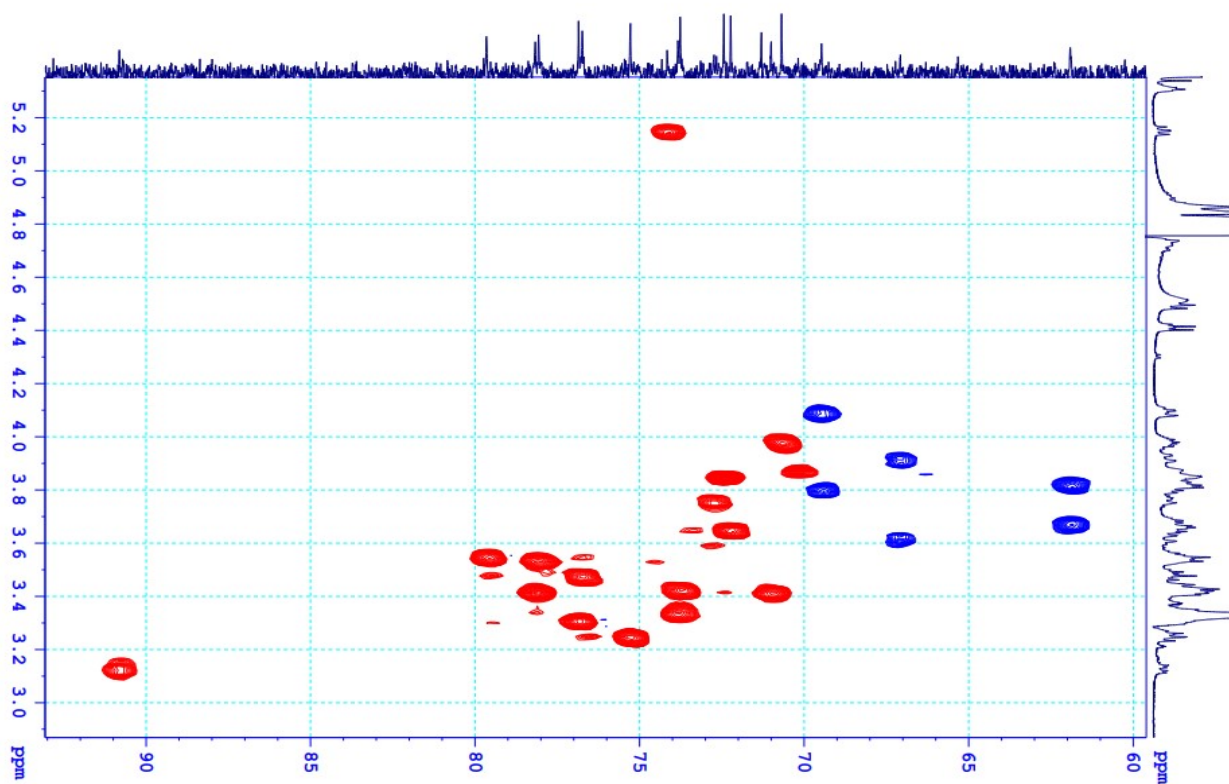

Figure S16. HSQC spectrum of compound **2** in  $\text{CD}_3\text{OD}$

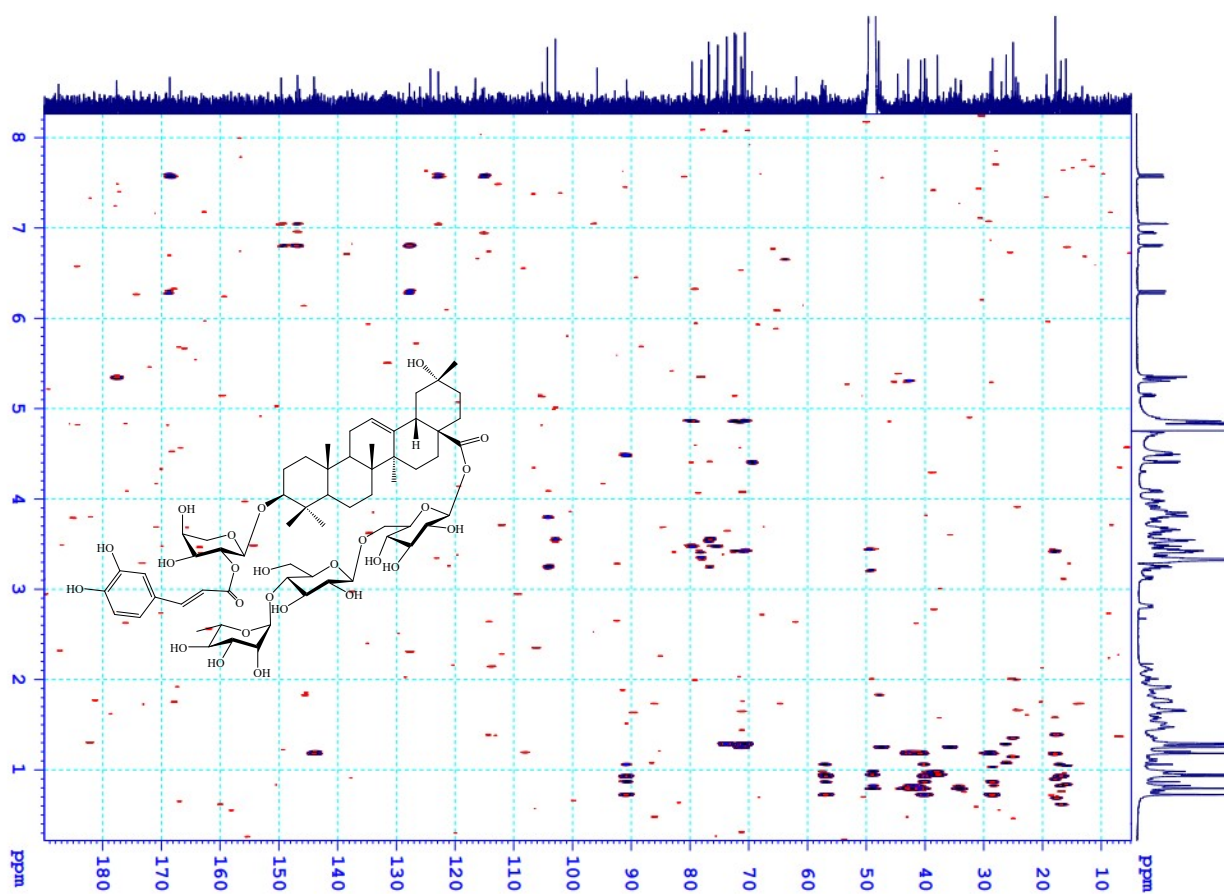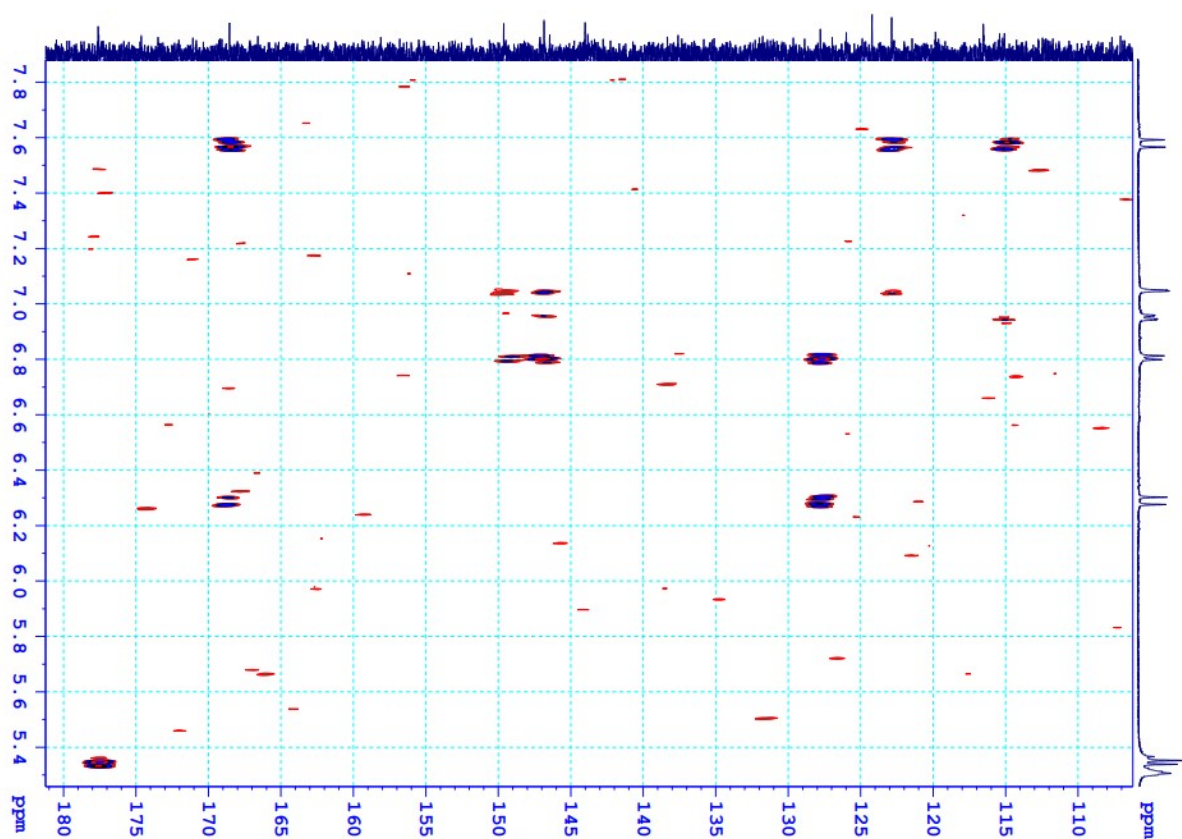

Figure S17. HMBC spectrum of compound **2** in CD<sub>3</sub>OD

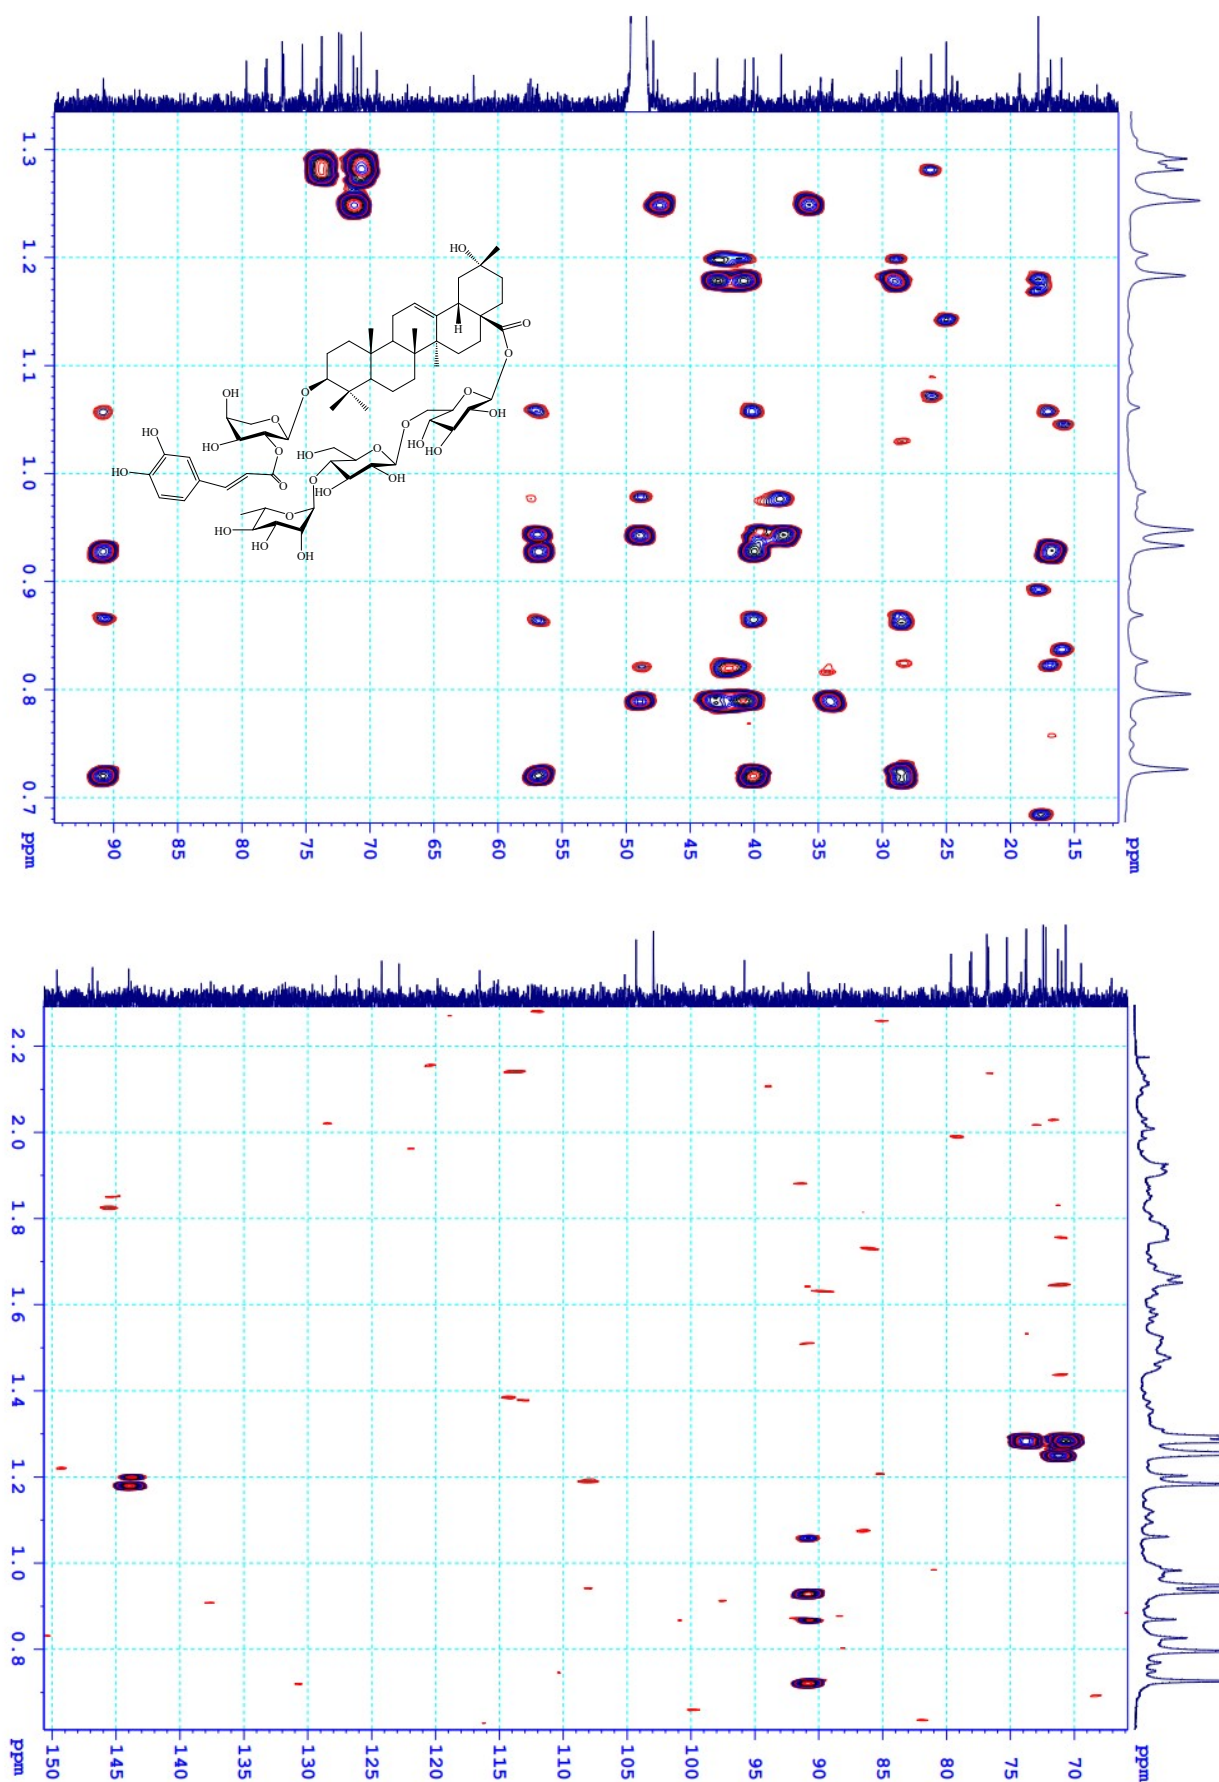

Figure S18. Extended HMBC spectrum of compound **2** in CD<sub>3</sub>OD

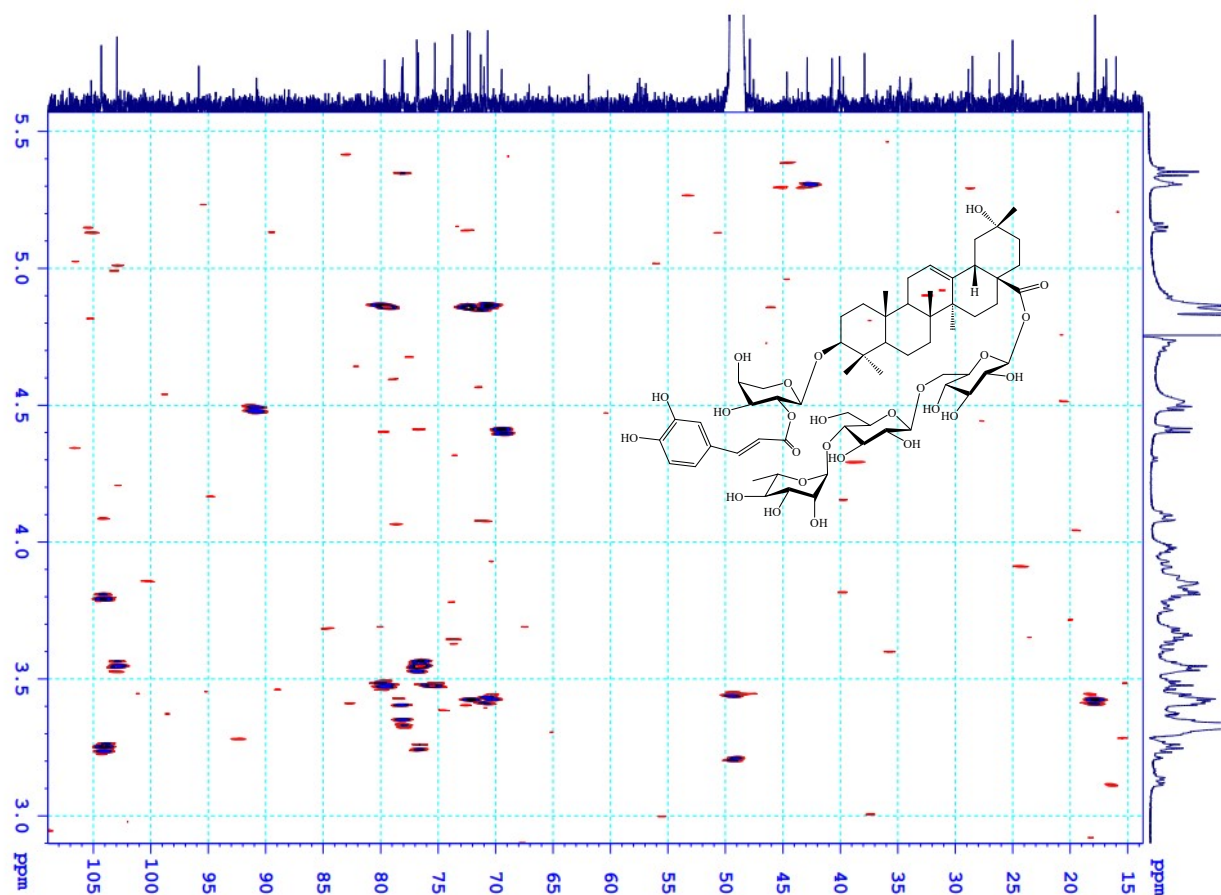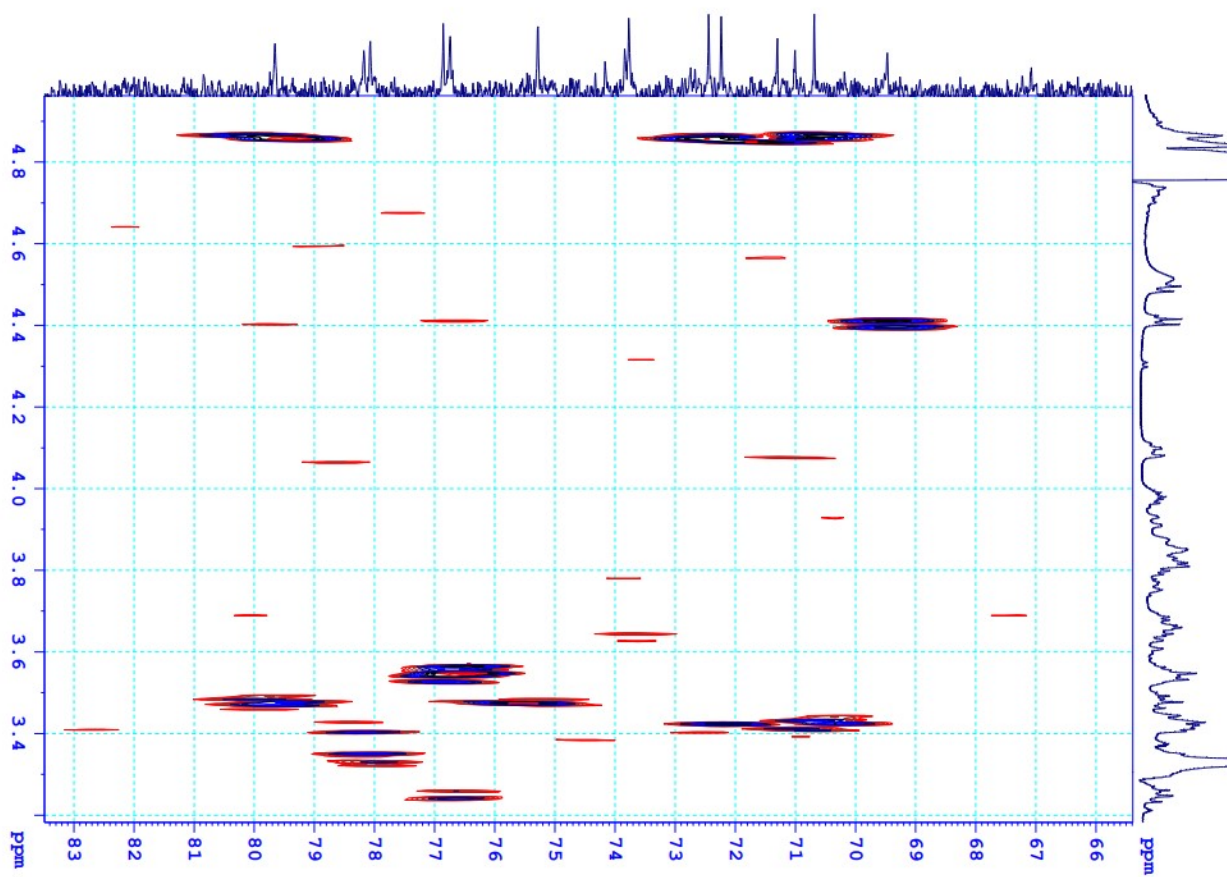

Figure S19. Extended HMBC spectrum of compound **2** in CD<sub>3</sub>OD

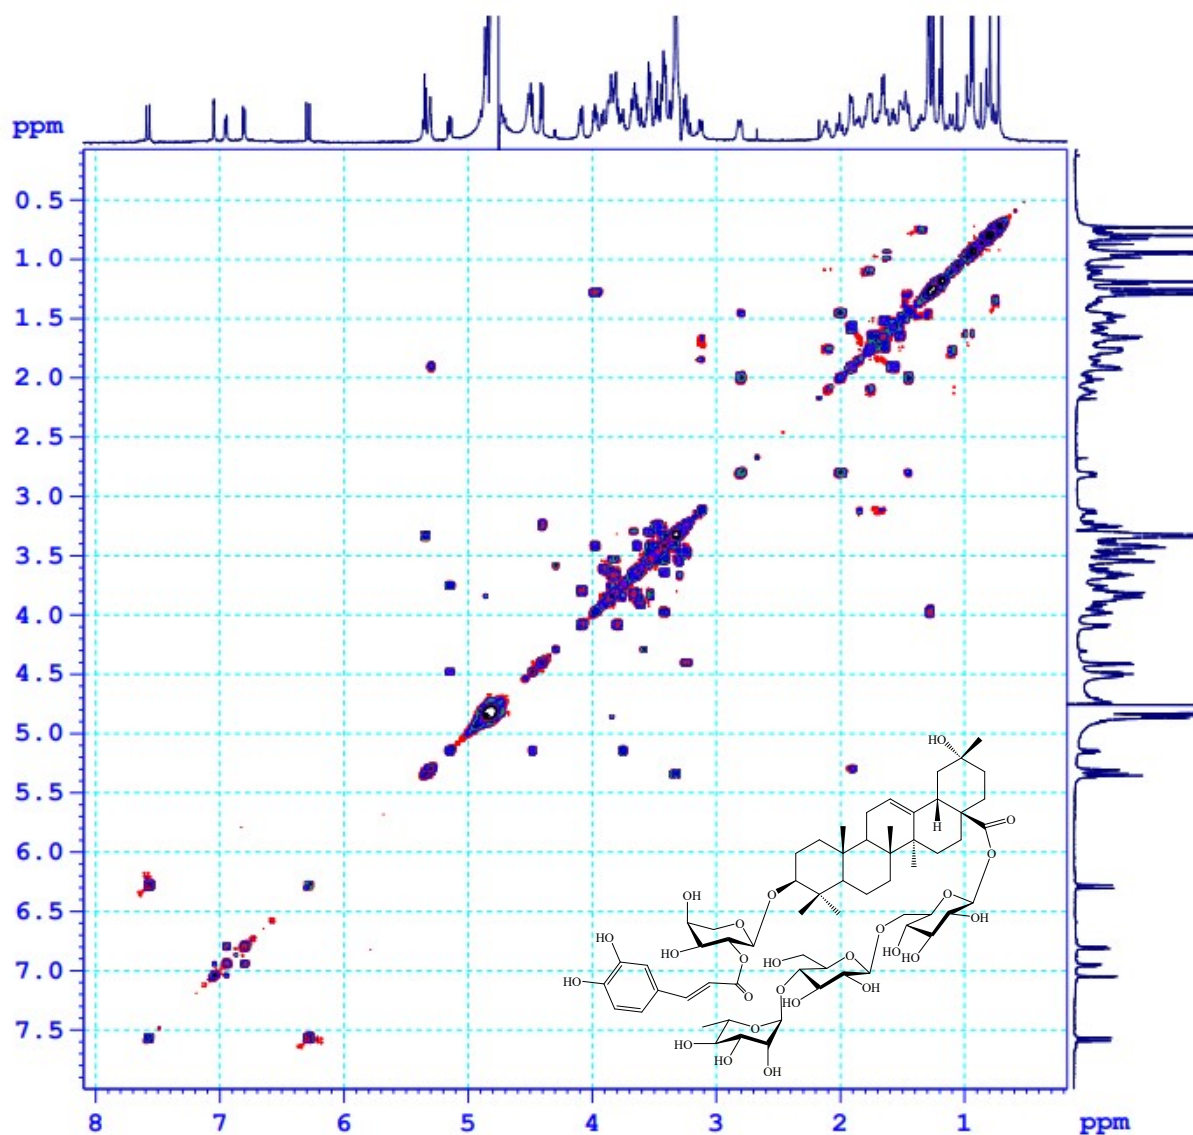

Figure S20. COSY spectrum of compound **2** in CD<sub>3</sub>OD

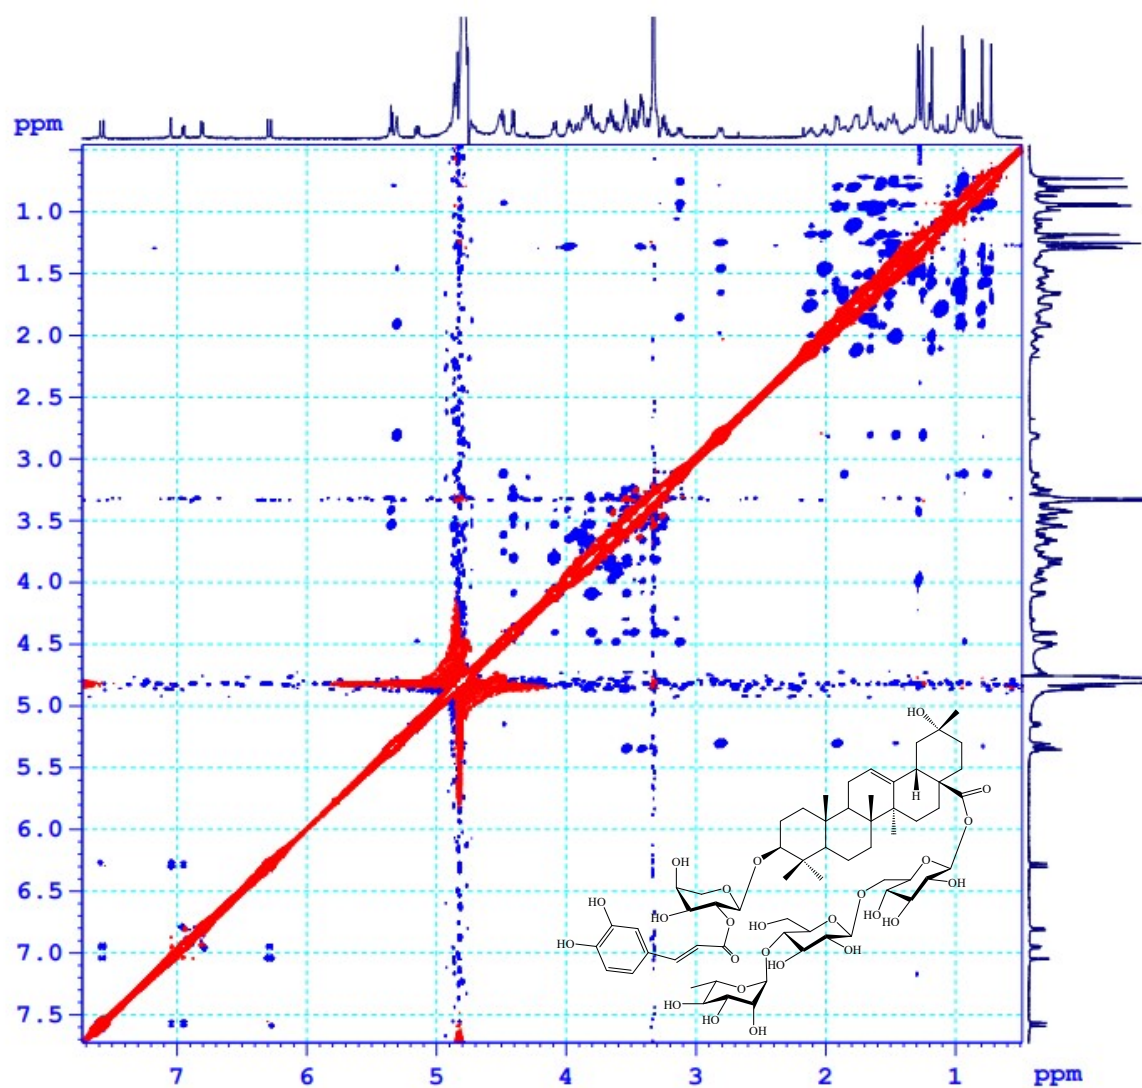

Figure S21. NOESY spectrum of compound **2** in CD<sub>3</sub>OD

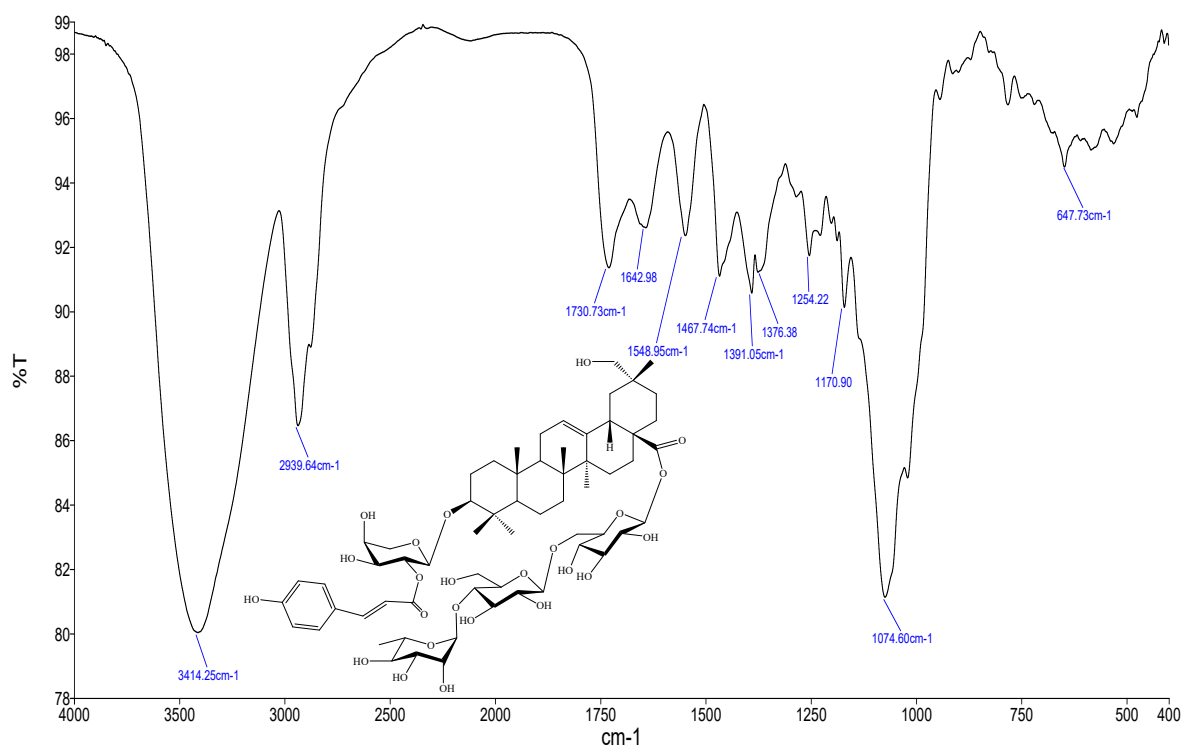

Figure S22. IR spectrum of compound **3**

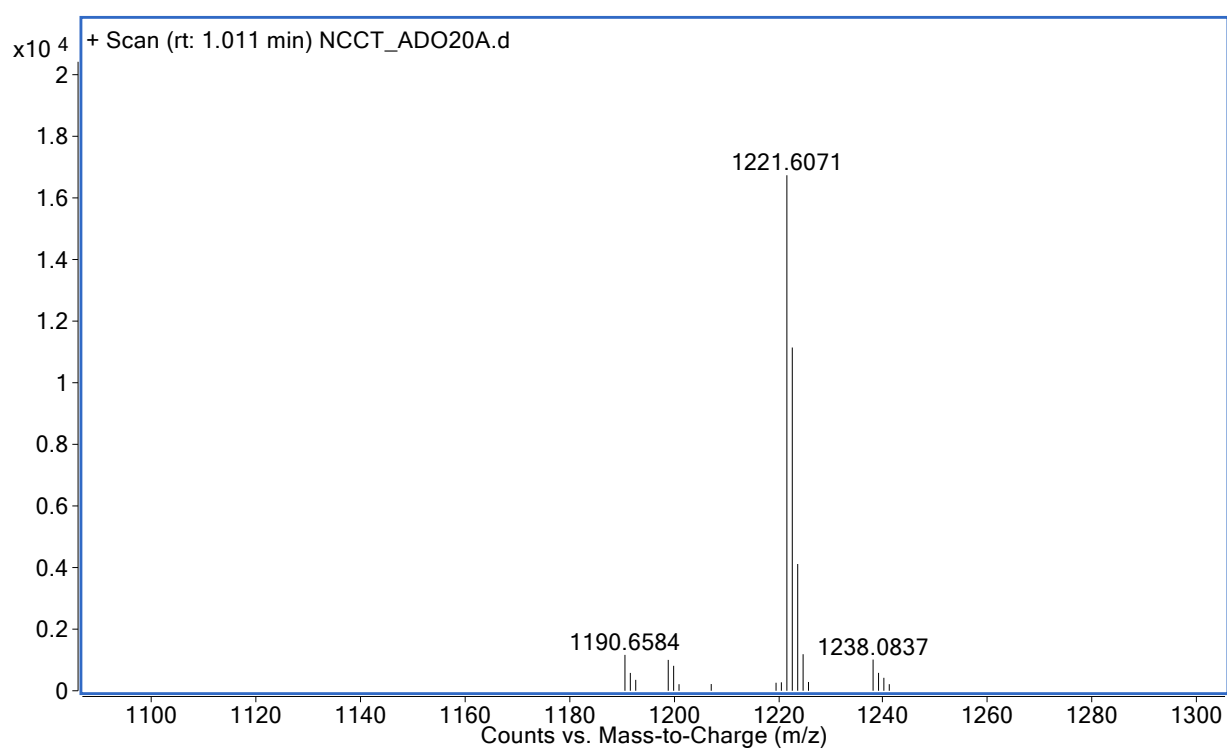

Figure S23. HR-ESI-MS spectrum of compound **3**

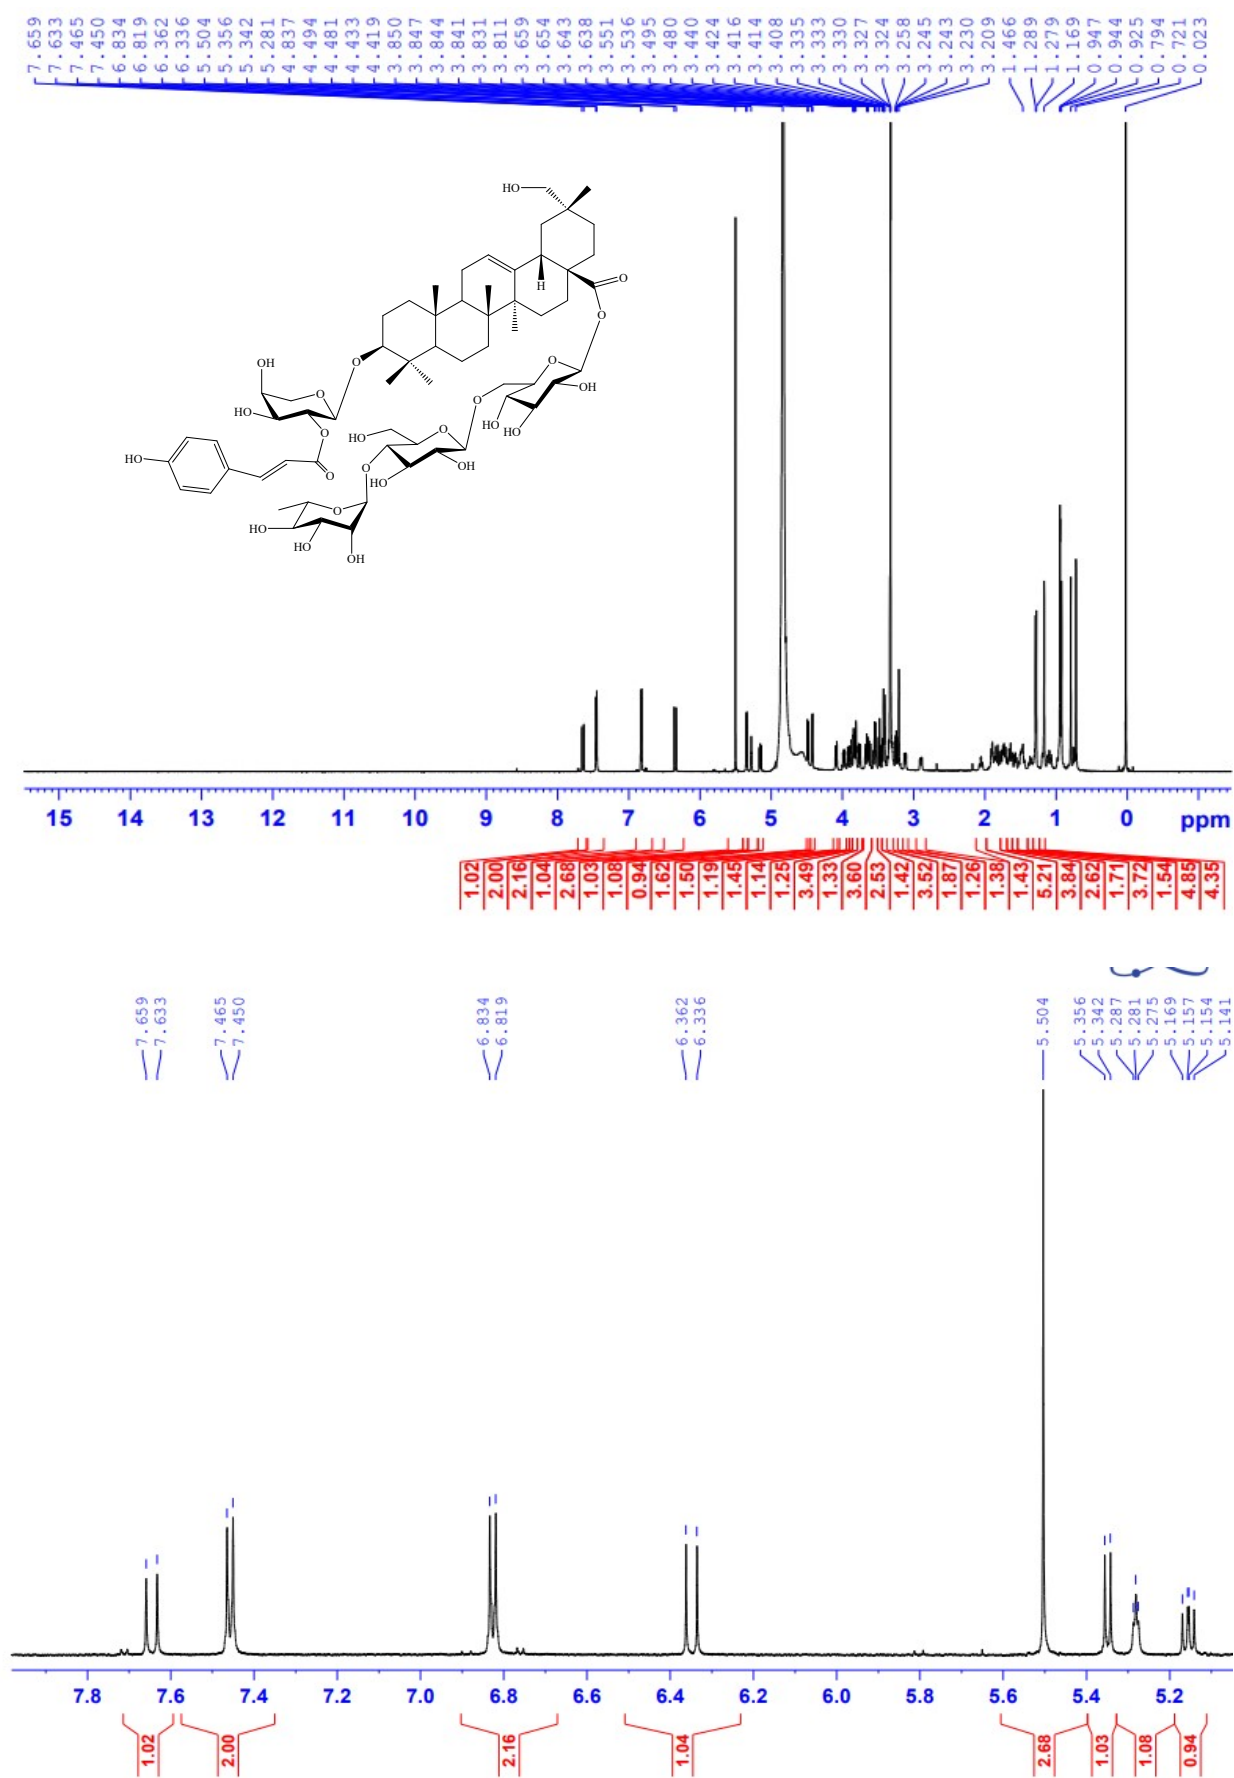

Figure S24.  $^1\text{H}$  NMR spectrum of compound 3 in  $\text{CD}_3\text{OD}$

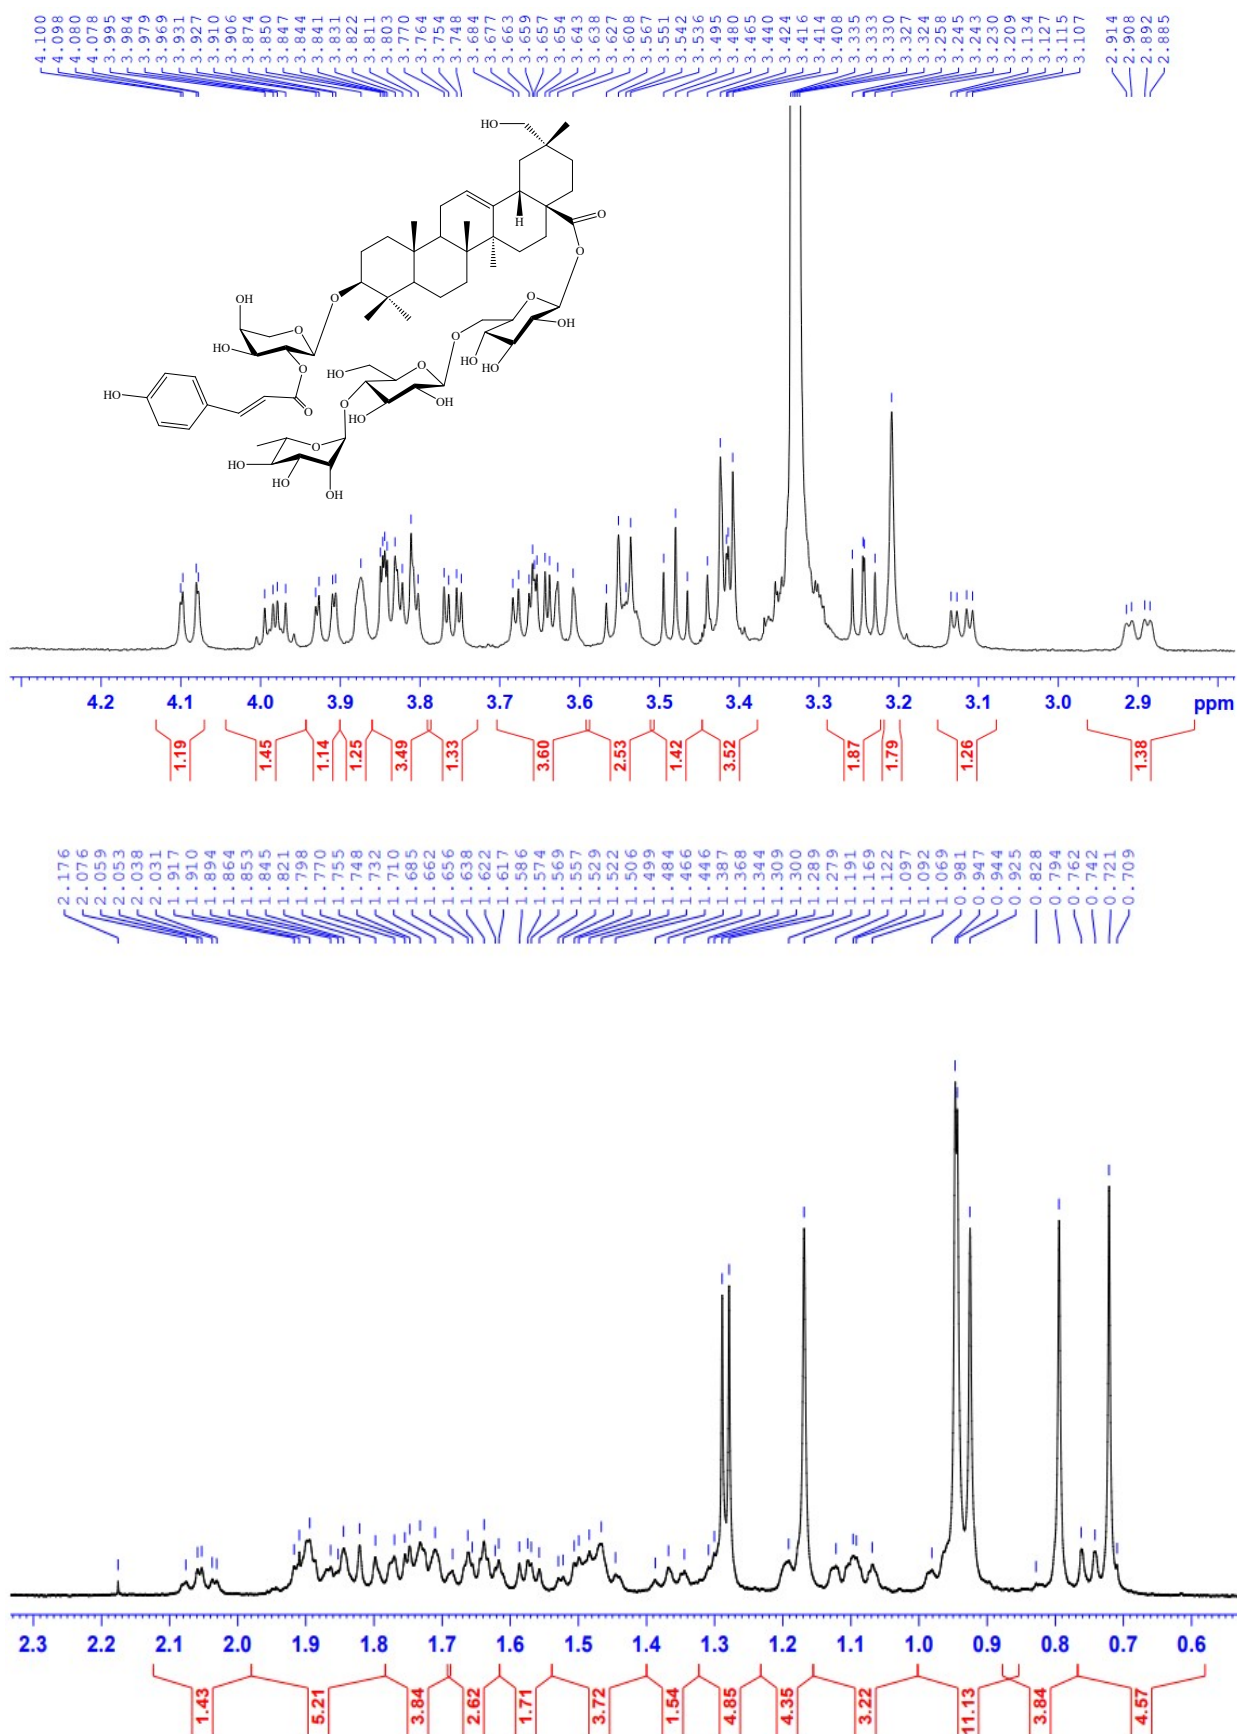

Figure S25. Extended  $^1\text{H}$  NMR spectrum of compound **3** in  $\text{CD}_3\text{OD}$

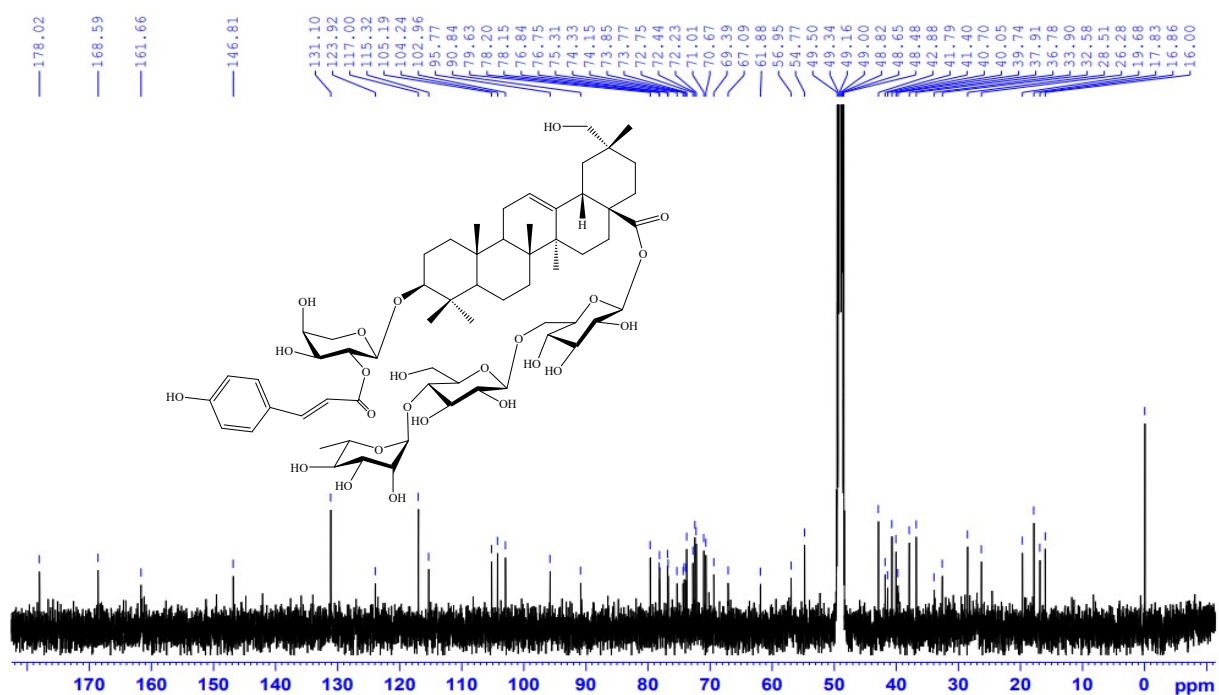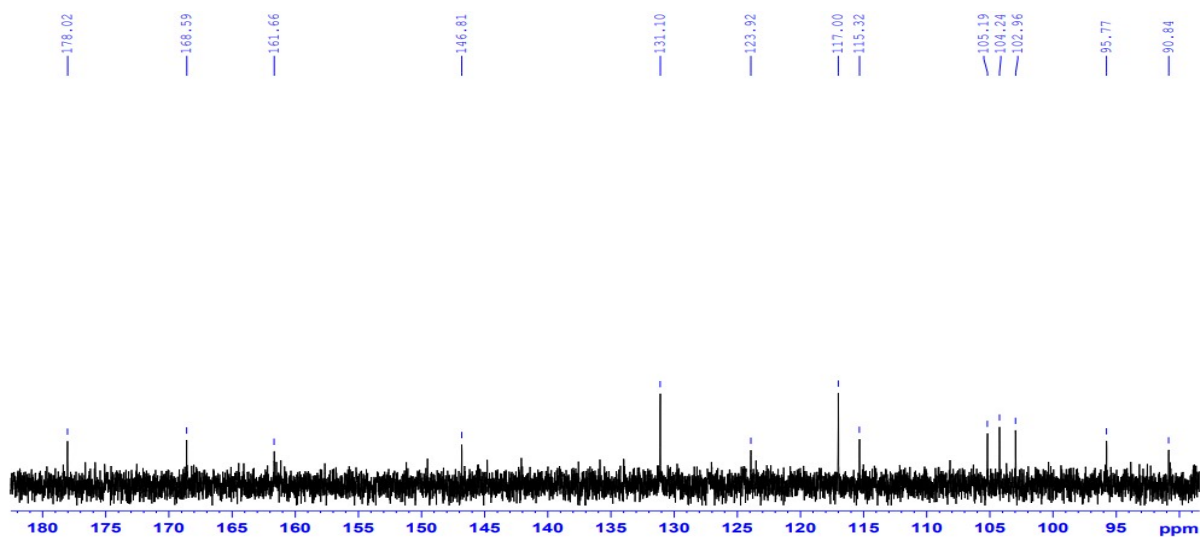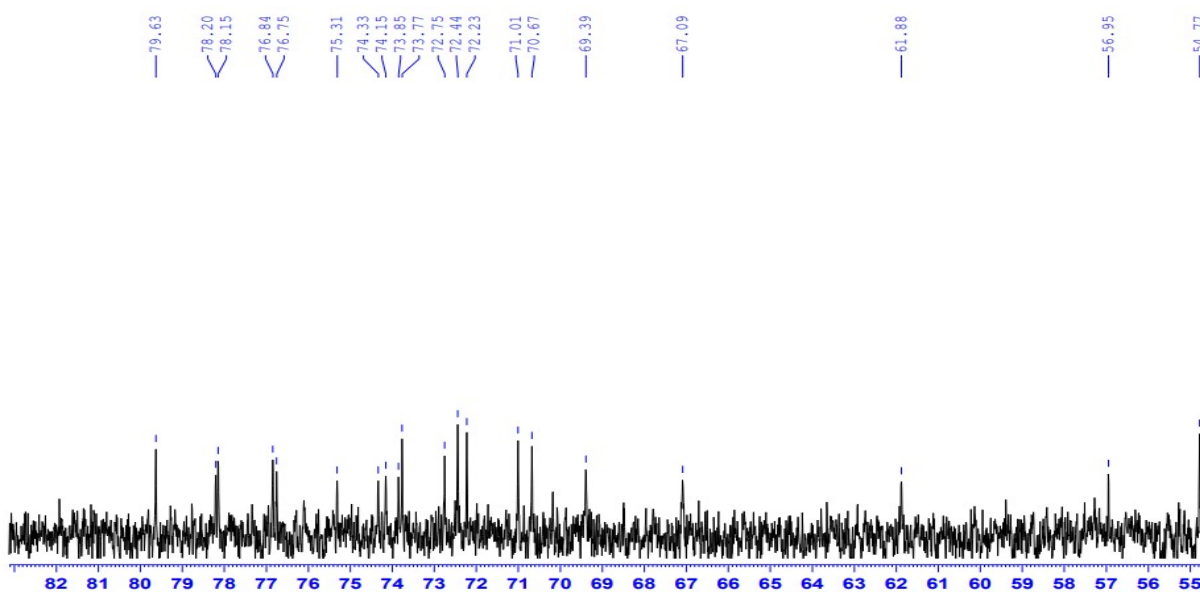

Figure S26.  $^{13}\text{C}$  NMR spectrum of compound **3** in  $\text{CD}_3\text{OD}$

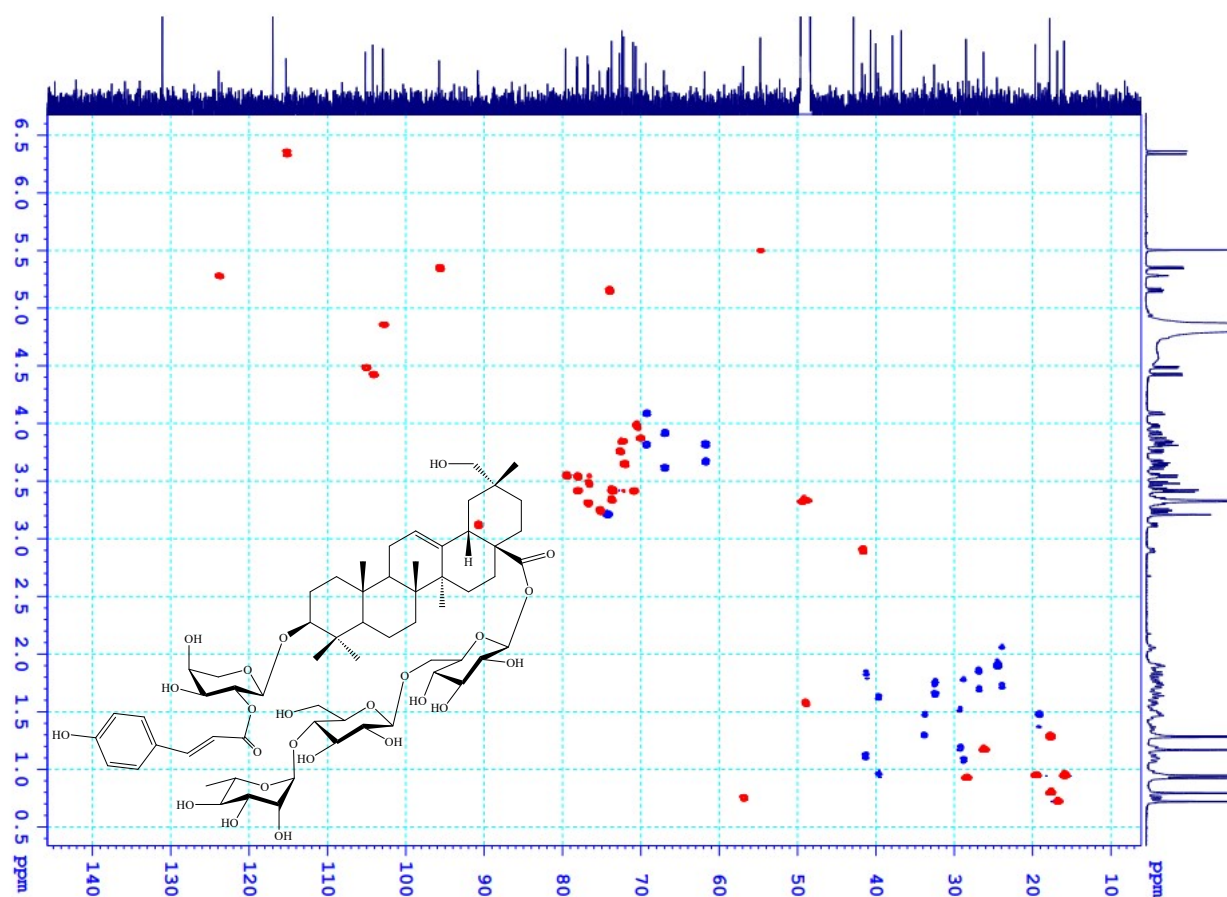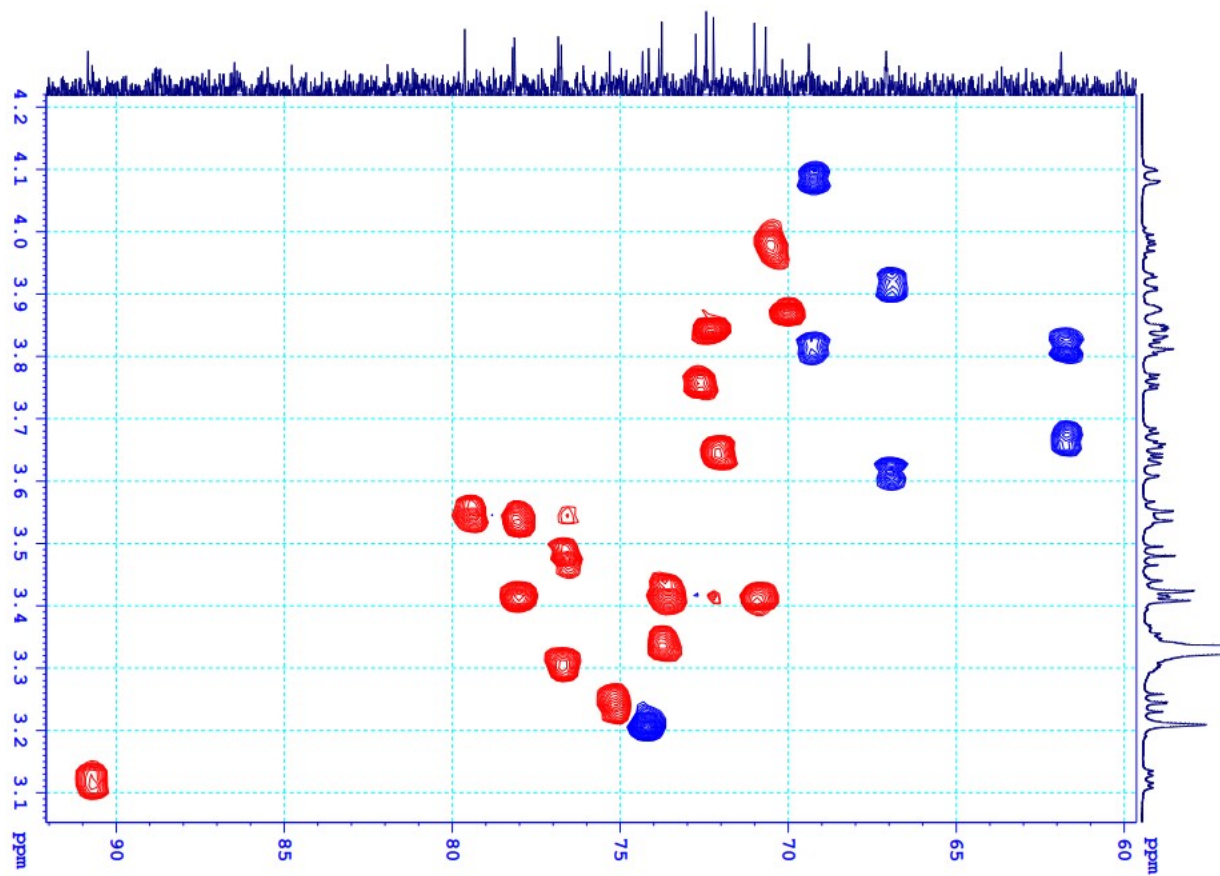

Figure S27. HSQC spectrum of compound 3 in CD<sub>3</sub>OD

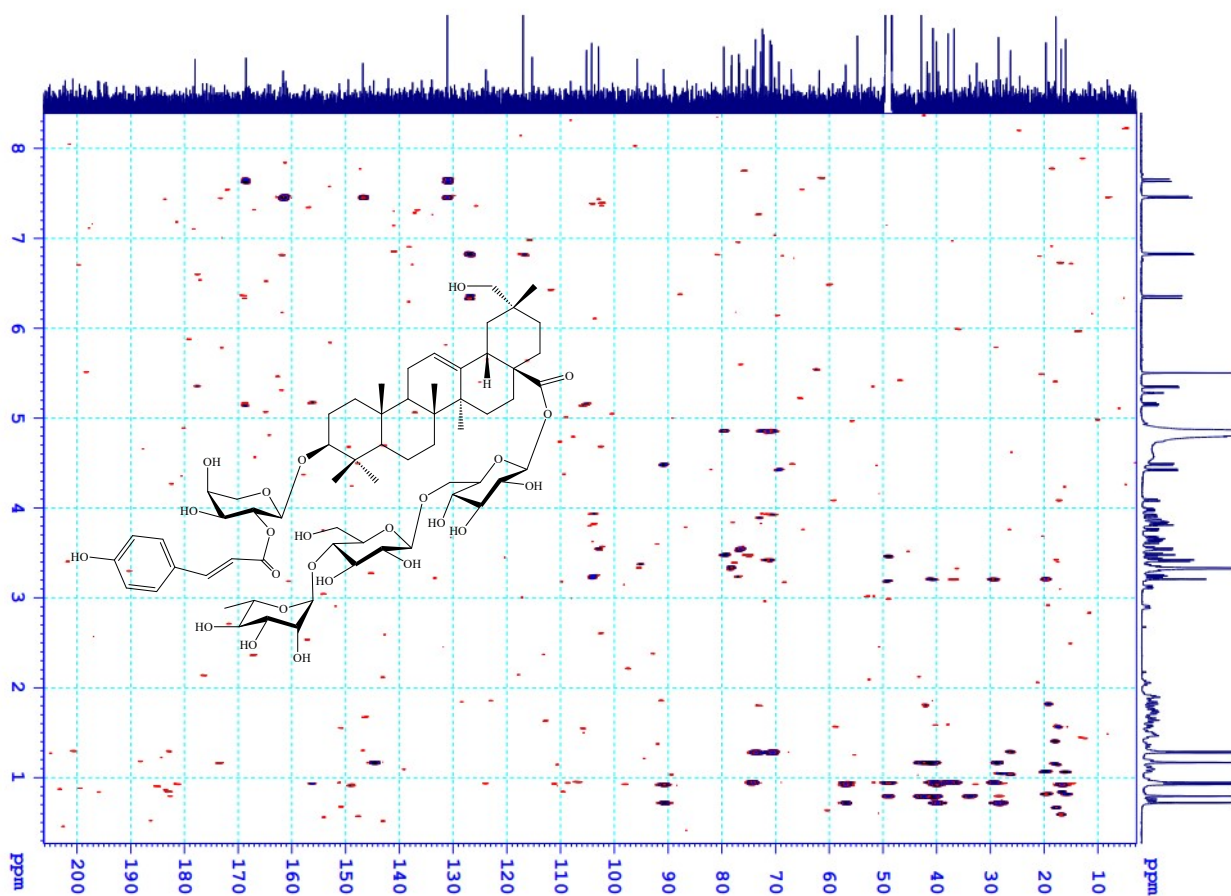

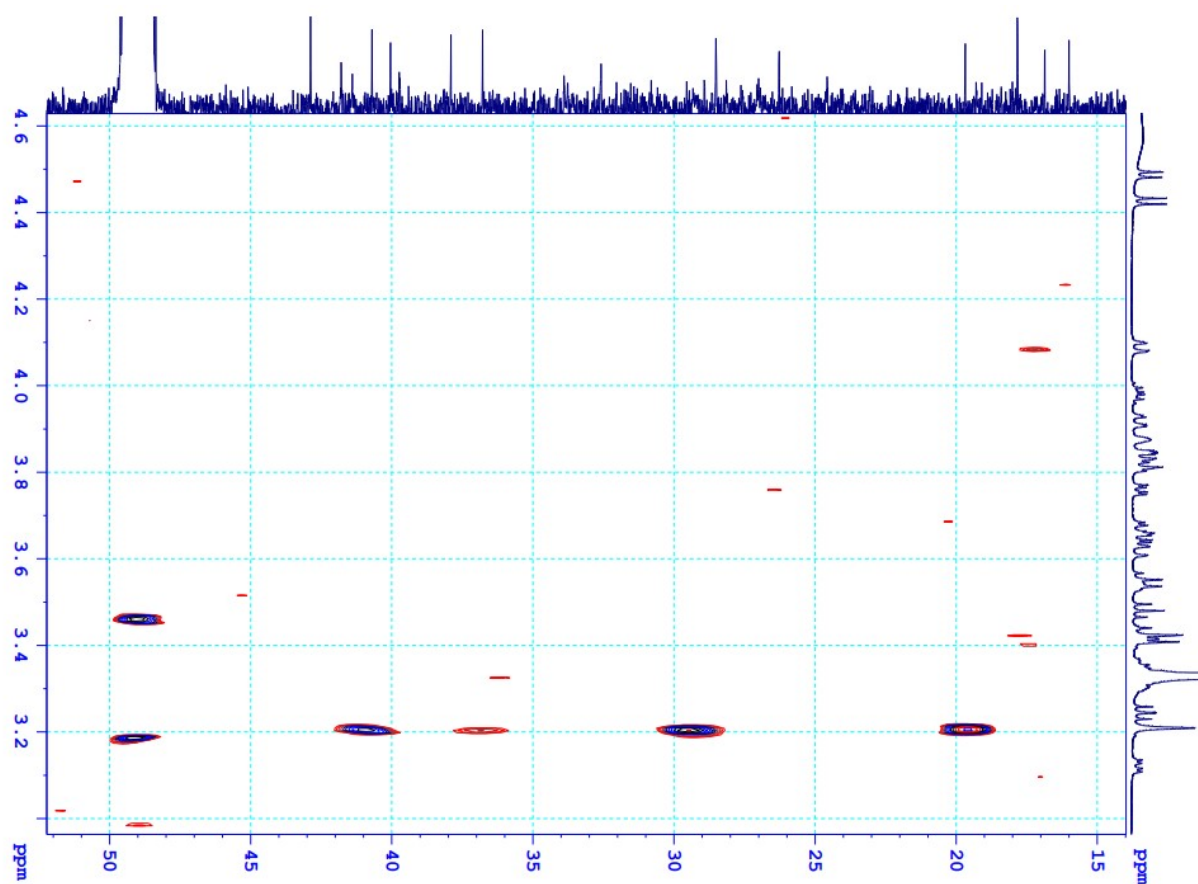

Figure S28. HMBC spectrum of compound **3** in CD<sub>3</sub>OD

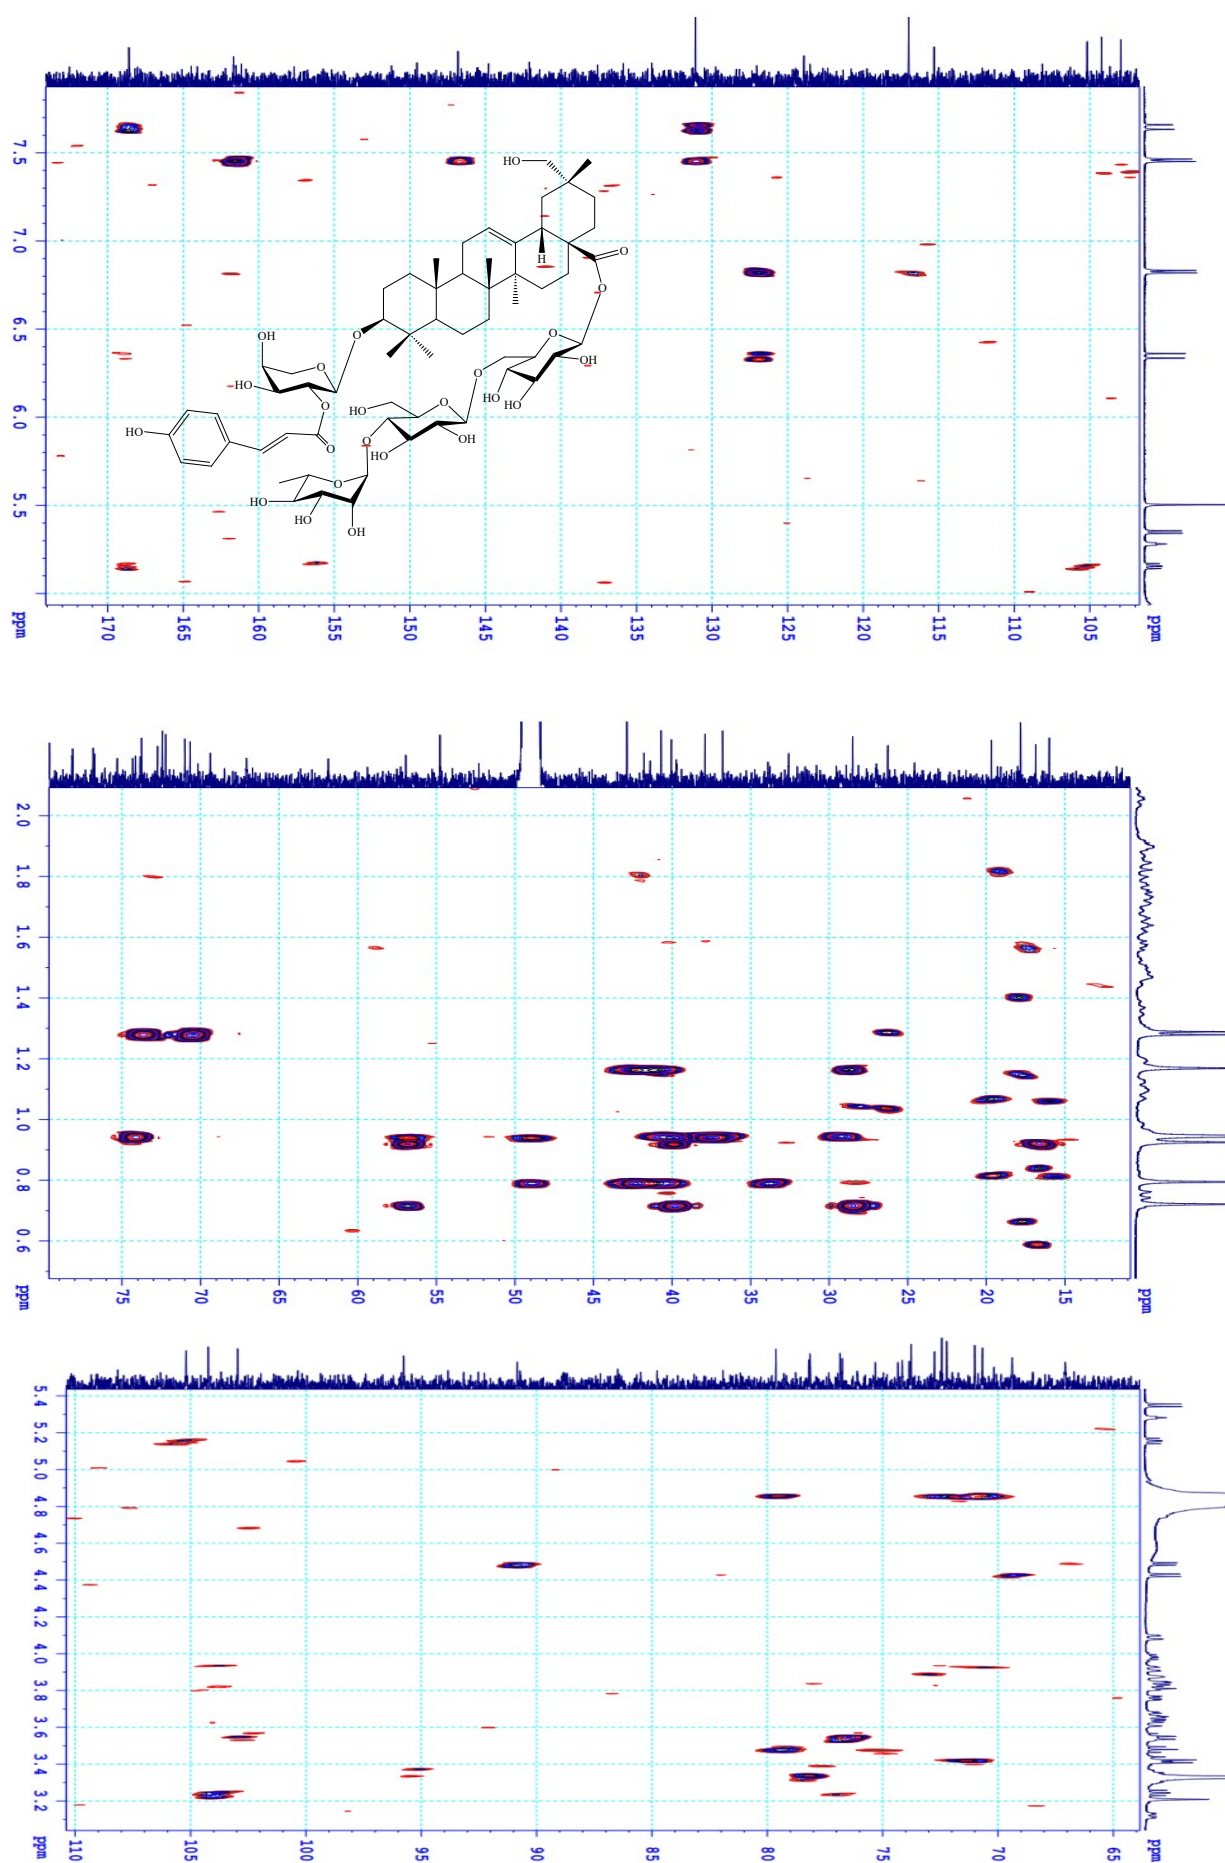

Figure S29. Extended HMBC spectrum of compound **3** in CD<sub>3</sub>OD



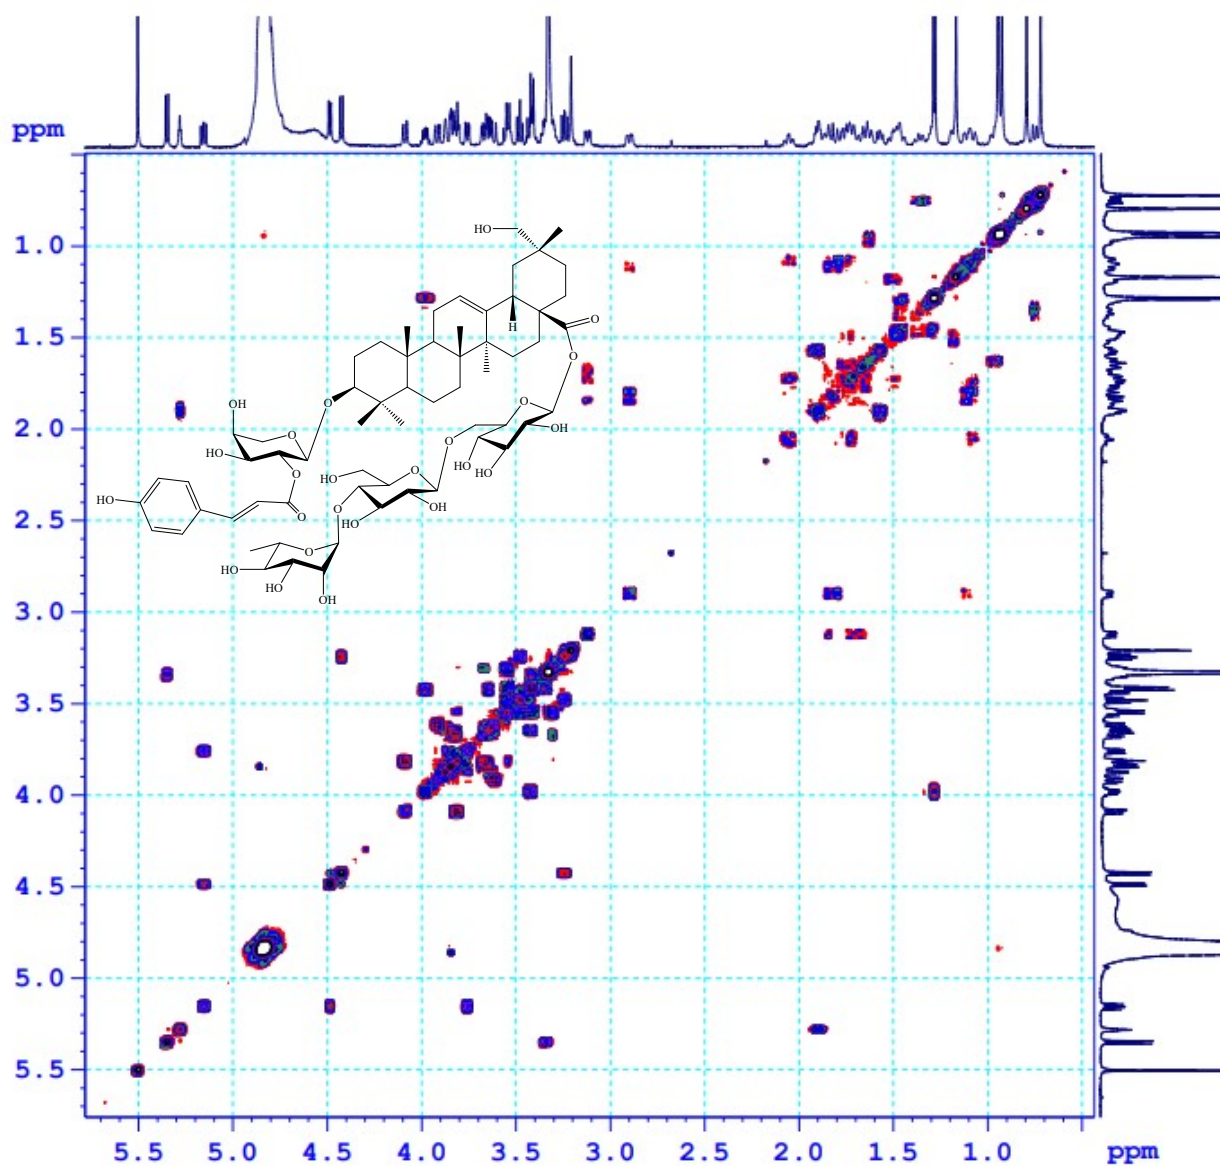

Figure S30. COSY spectrum of compound **3** in CD<sub>3</sub>OD

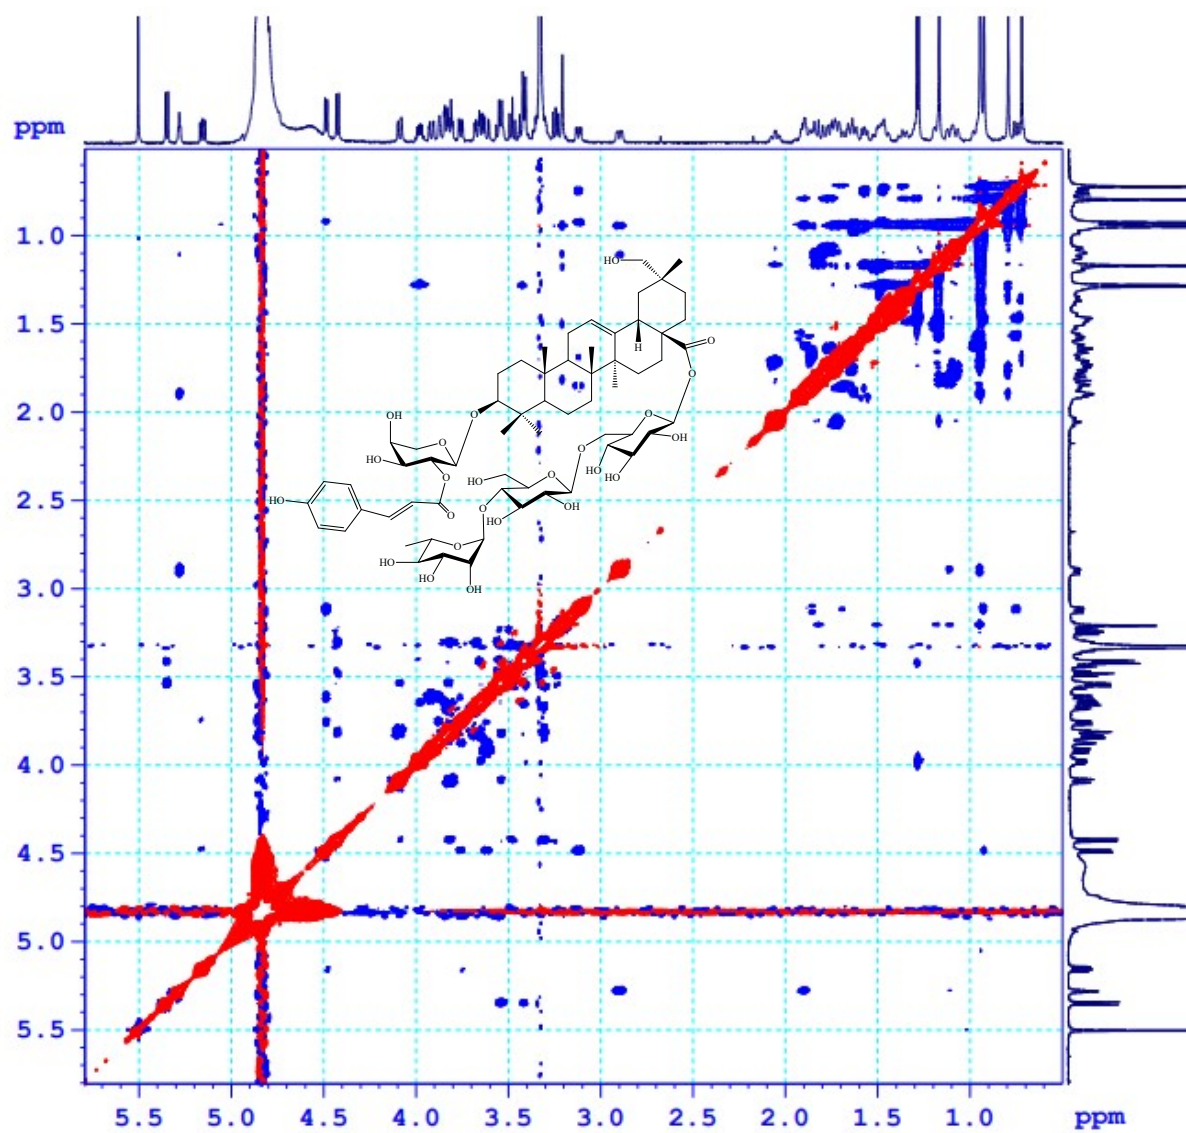

Figure S31. NOESY spectrum of compound **3** in CD<sub>3</sub>OD

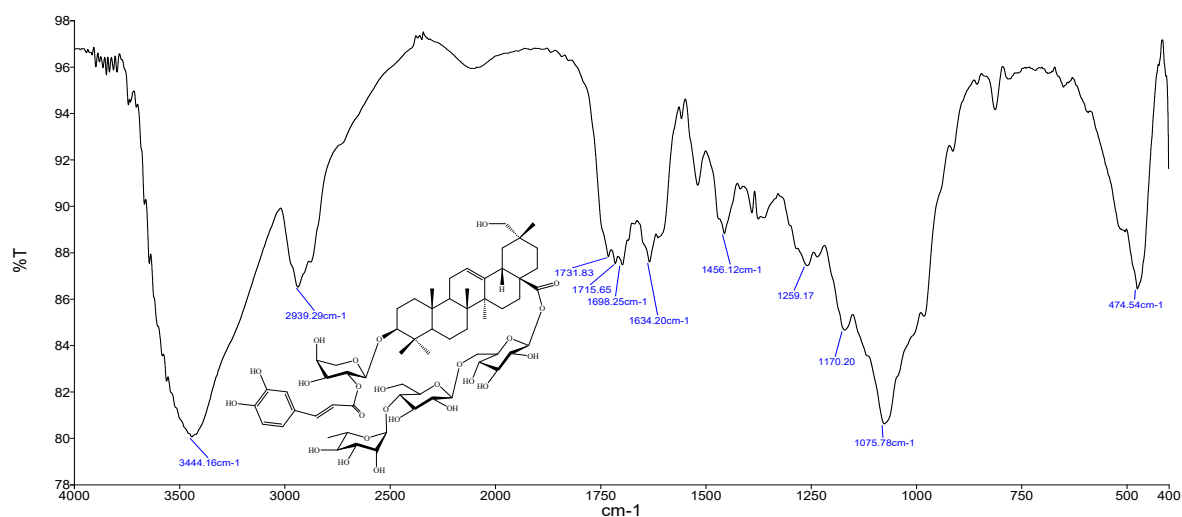

Figure S32. IR spectrum of compound 4

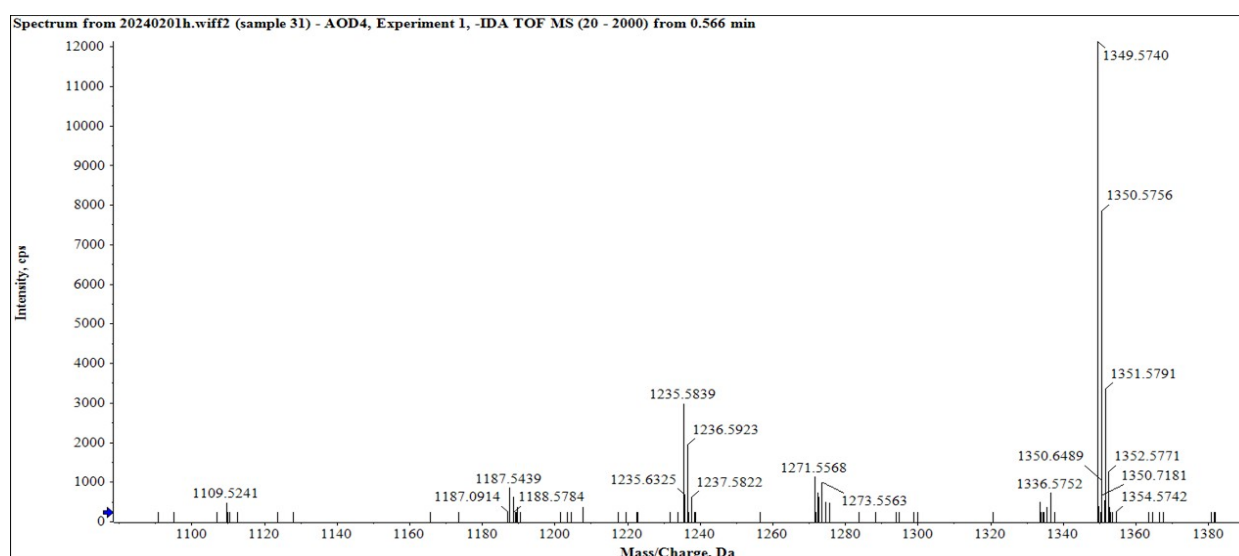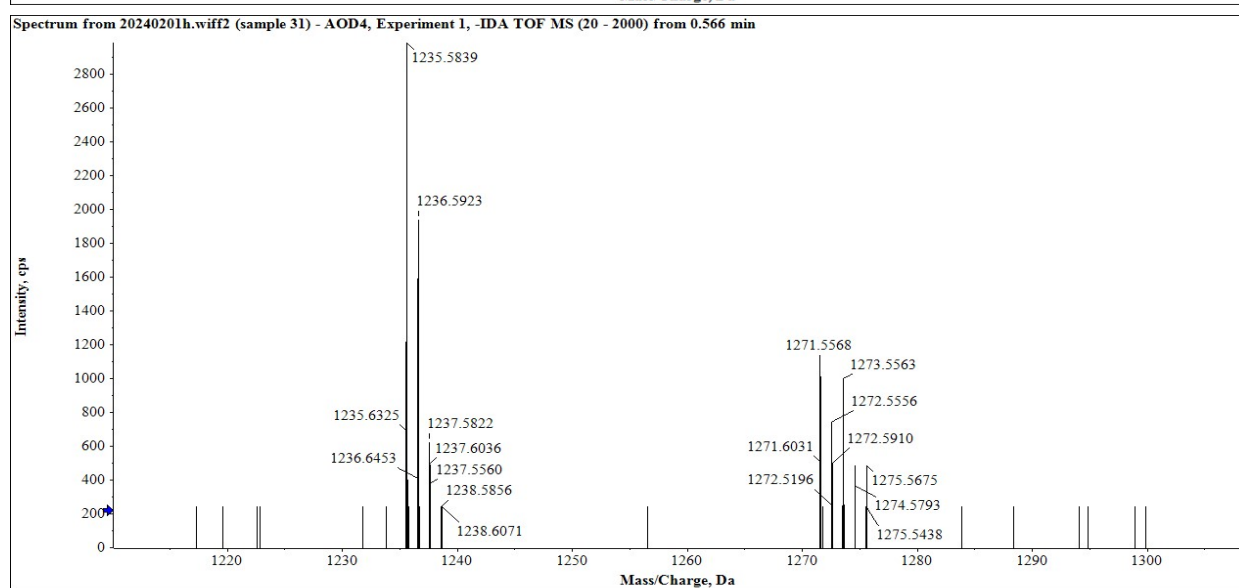

HR-ESI-MS  $m/z$  1235.5839 [M-H]<sup>-</sup>, (calcd. for [C<sub>62</sub>H<sub>91</sub>O<sub>25</sub>]<sup>-</sup>, 1235.5855,  $\Delta$ =-1.3 ppm),  $m/z$  1271.5568 [M+<sup>35</sup>Cl]<sup>-</sup>, (calcd. for [C<sub>62</sub>H<sub>92</sub>O<sub>25</sub><sup>35</sup>Cl]<sup>-</sup>, 1271.5521,  $\Delta$ =-4.2 ppm),  $m/z$  1273.5563 [M+<sup>37</sup>Cl]<sup>-</sup>, (calcd. for [C<sub>62</sub>H<sub>92</sub>O<sub>25</sub><sup>37</sup>Cl]<sup>-</sup>, 1273.5592,  $\Delta$ =-2.3 ppm)

Figure S33. HR-ESI-MS spectrum of compound 4

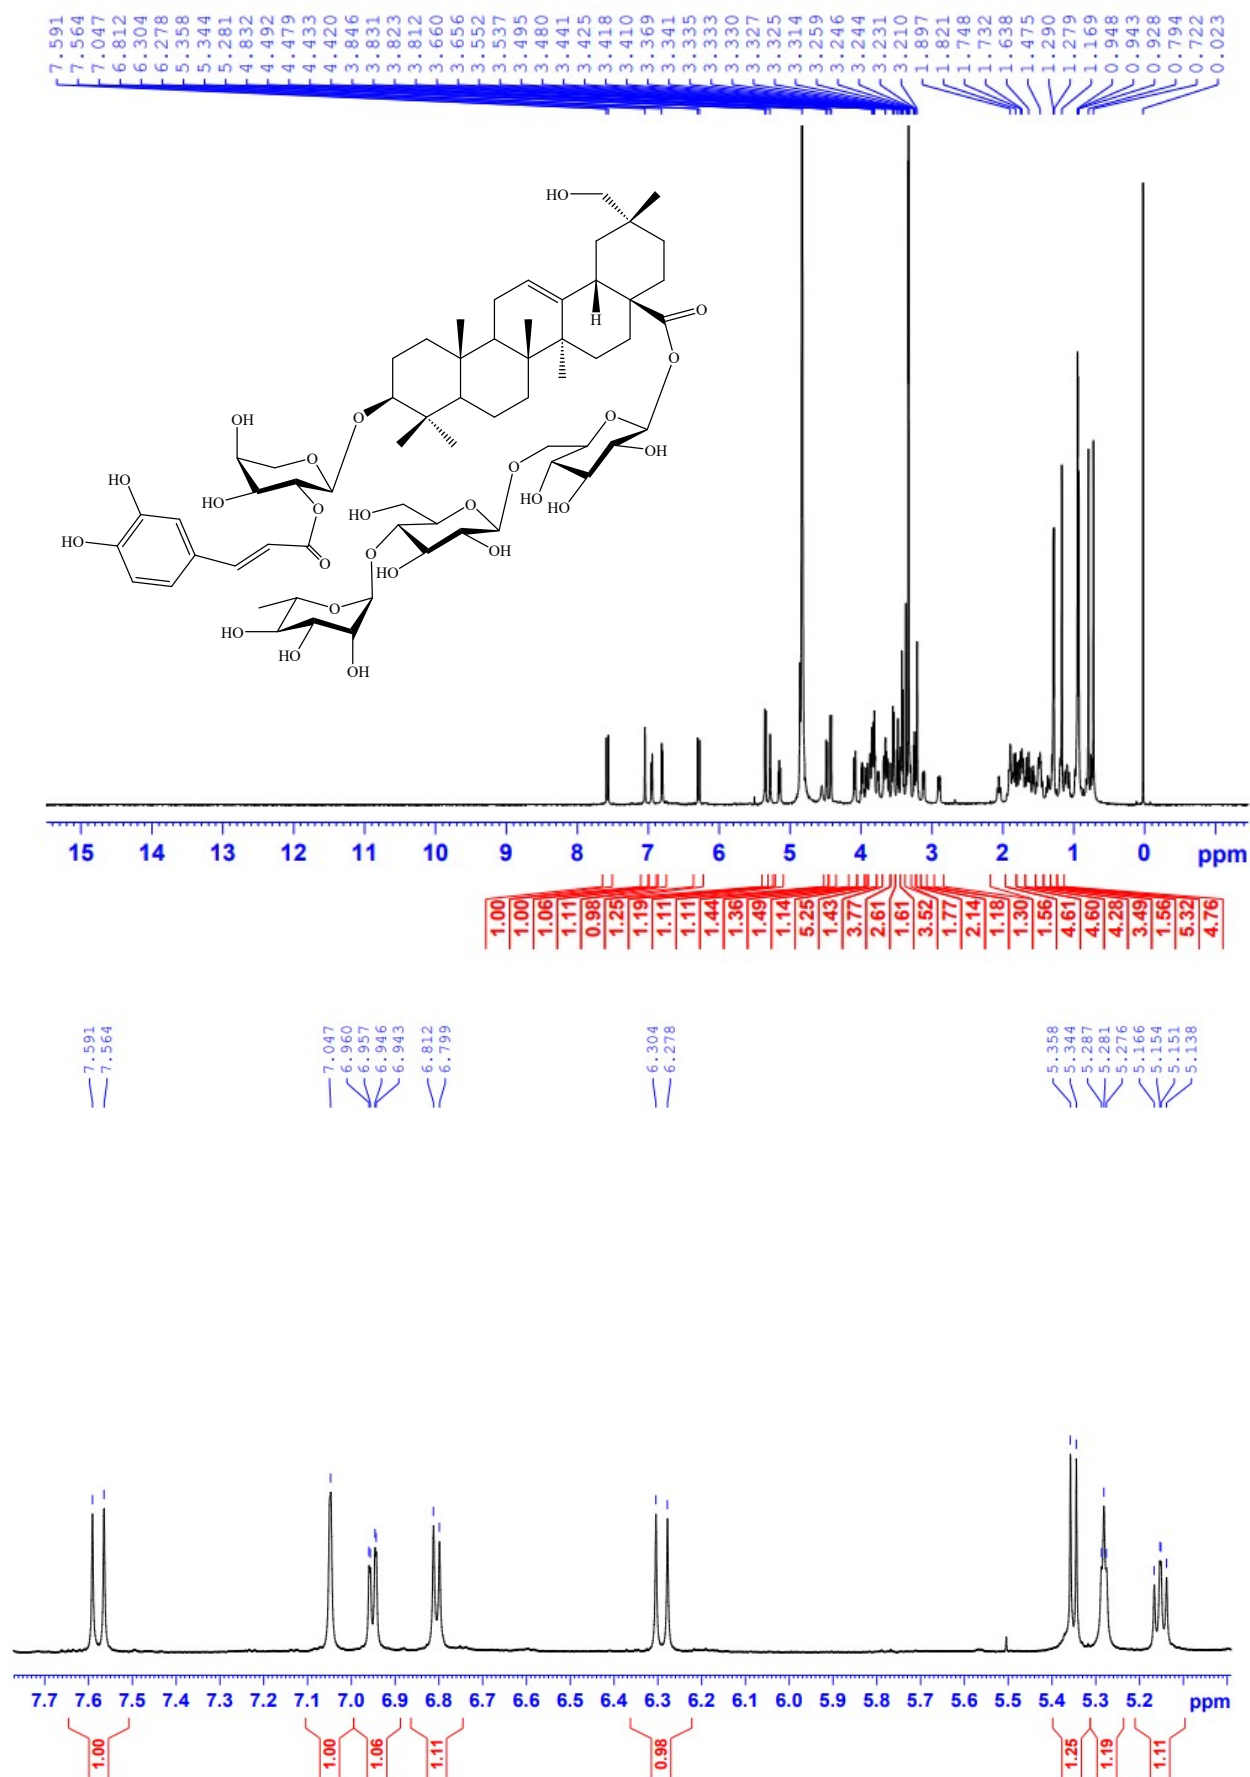

Figure S34.  $^1\text{H}$  NMR spectrum of compound 4 in  $\text{CD}_3\text{OD}$

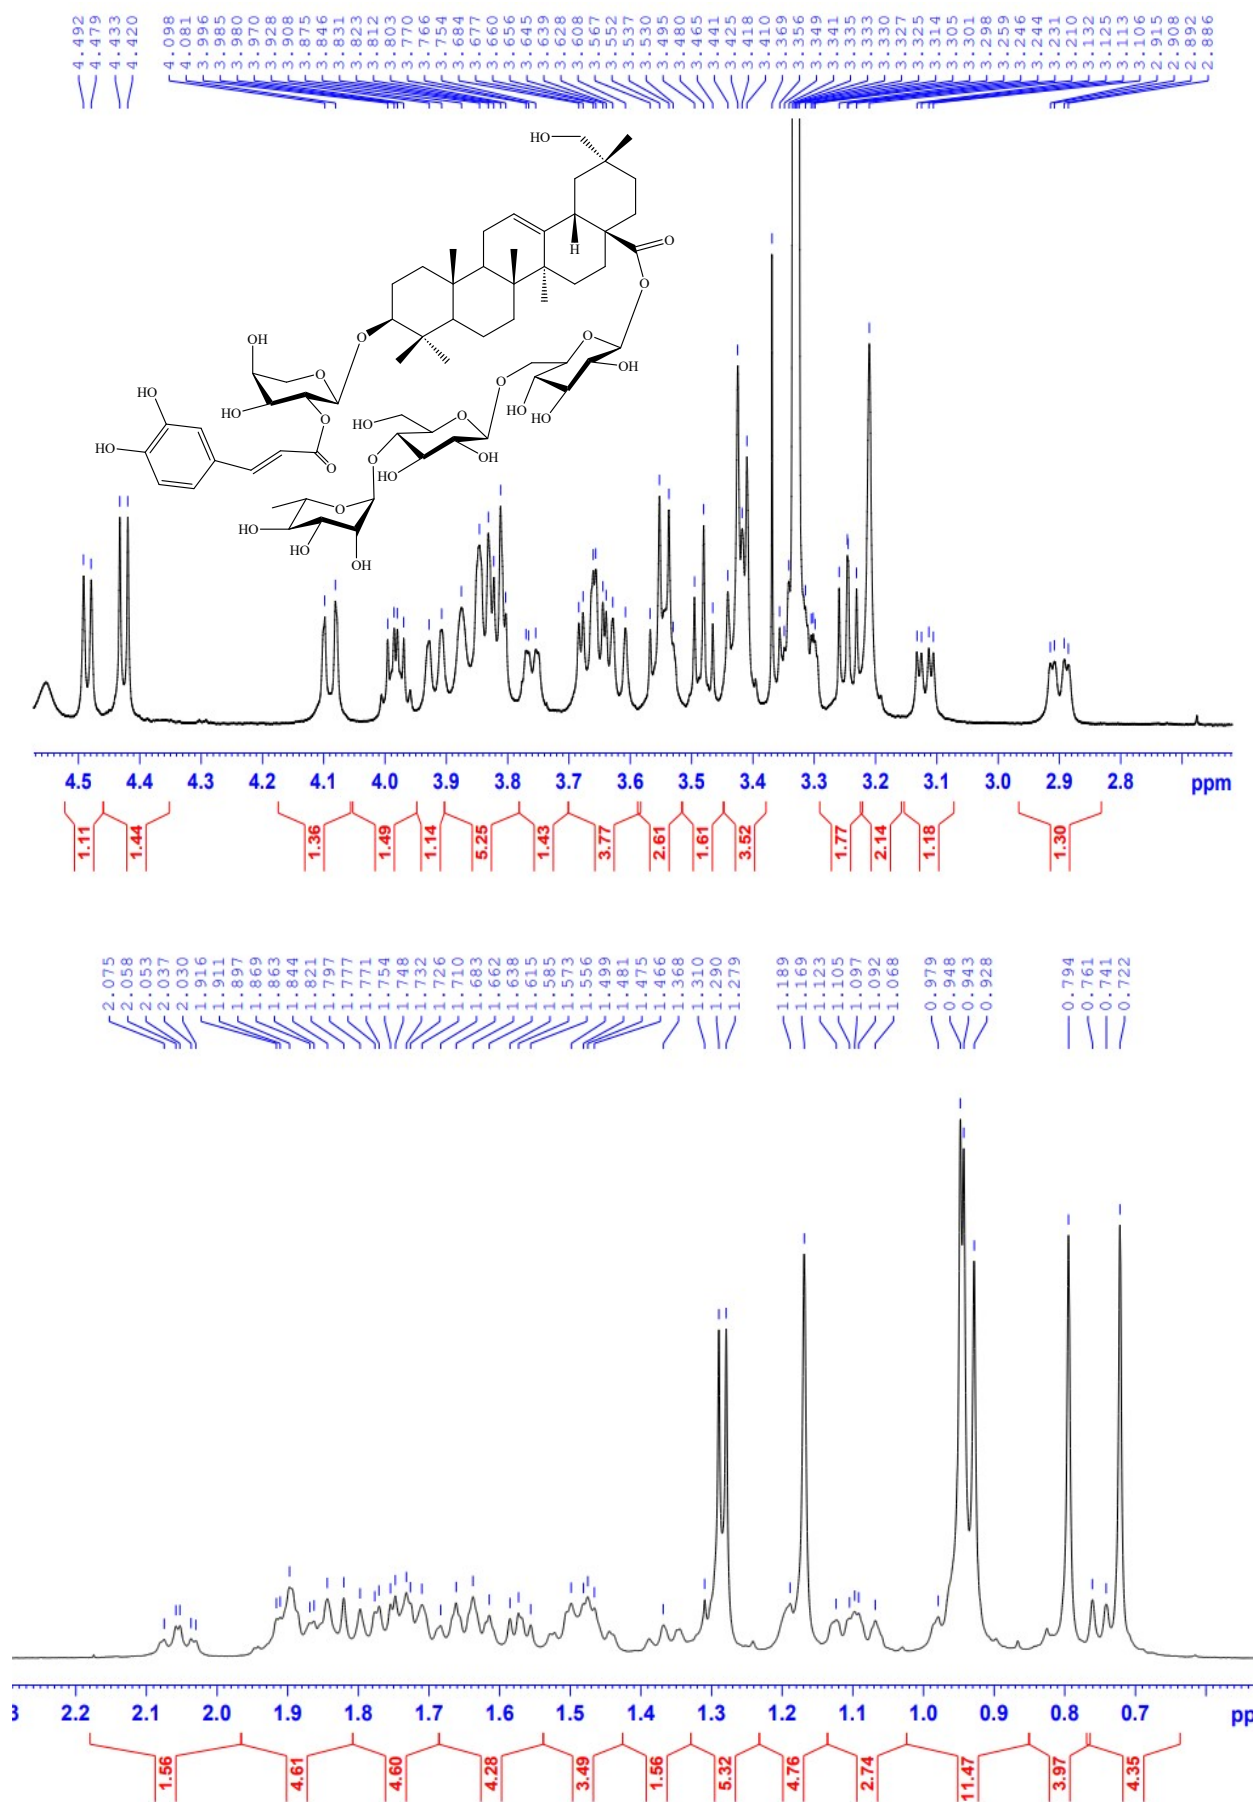

Figure S35. Extended  $^1\text{H}$  NMR spectrum of compound **4** in  $\text{CD}_3\text{OD}$

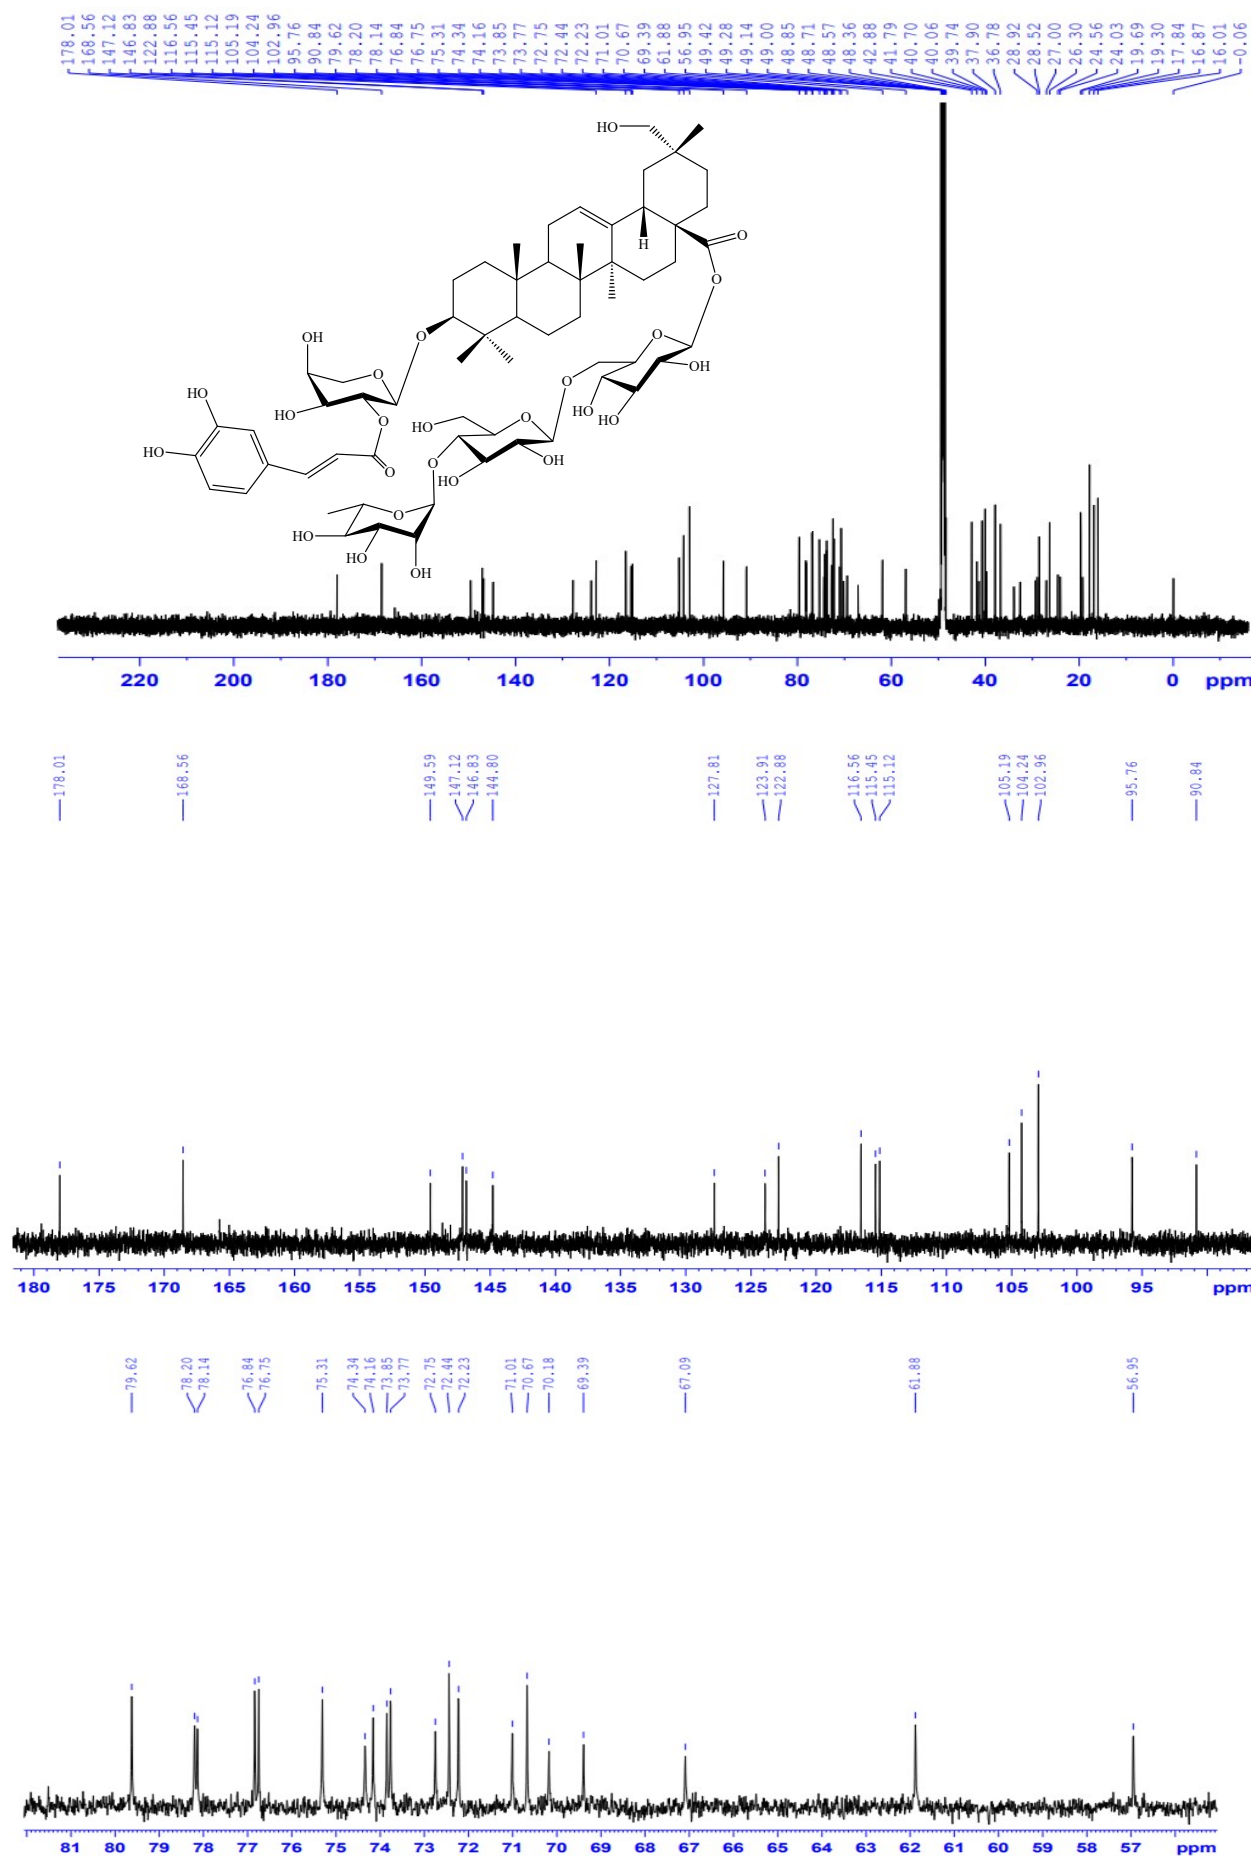

Figure S36.  $^{13}\text{C}$  NMR spectrum of compound **4** in  $\text{CD}_3\text{OD}$



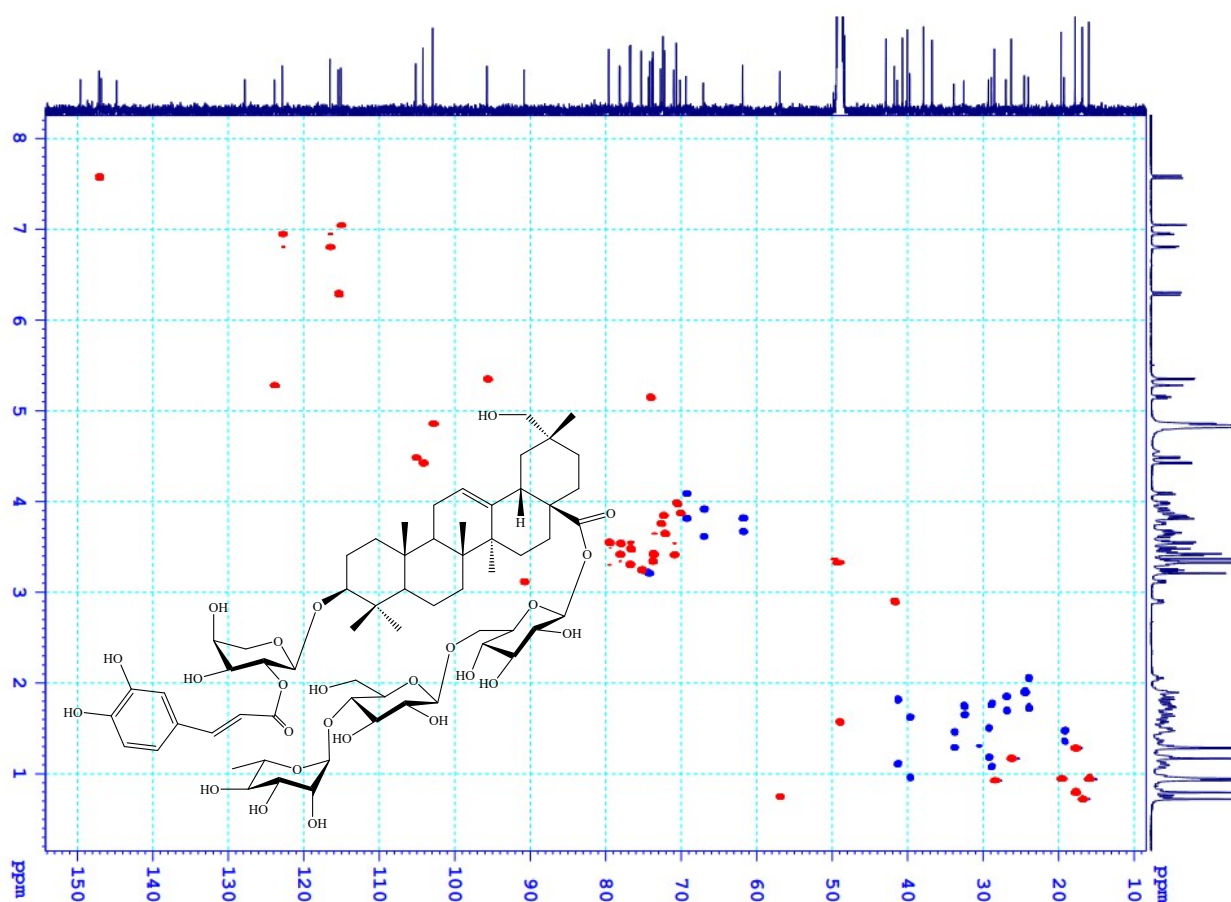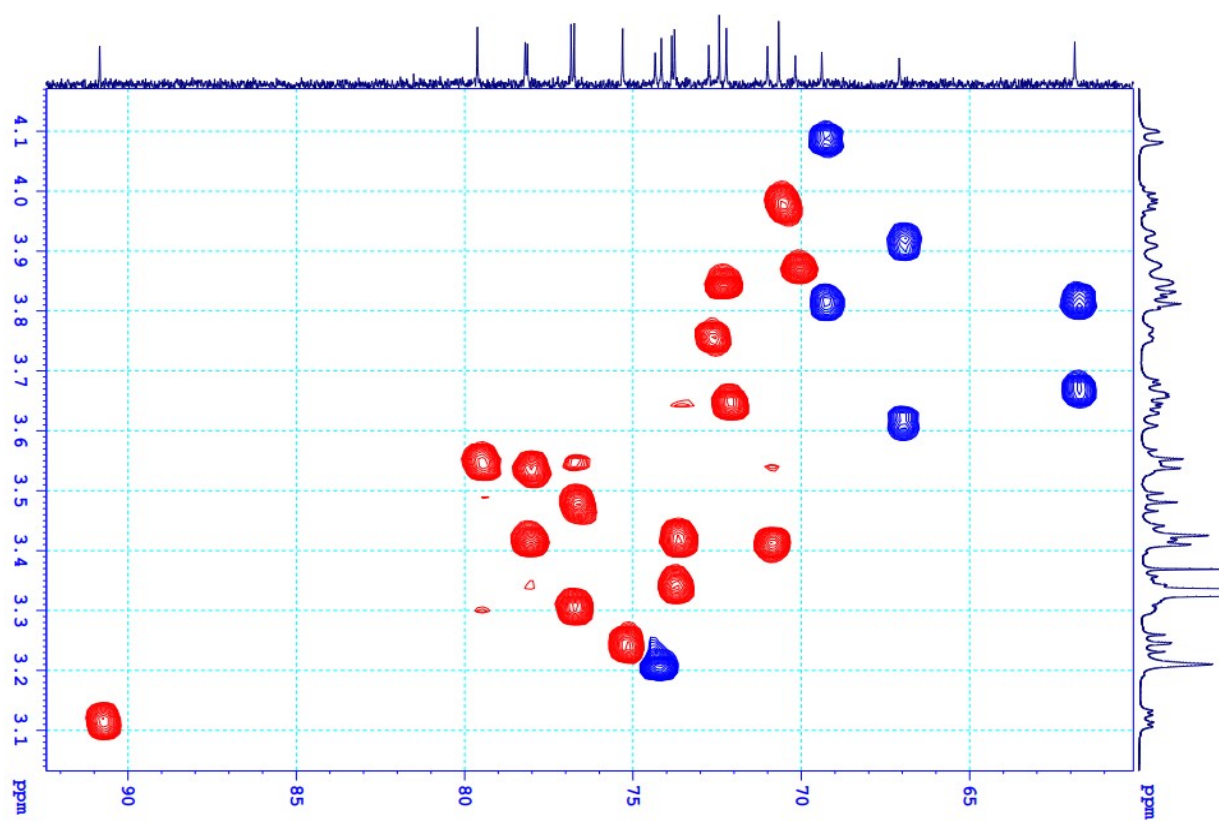

Figure S37. HSQC spectrum of compound **4** in CD<sub>3</sub>OD



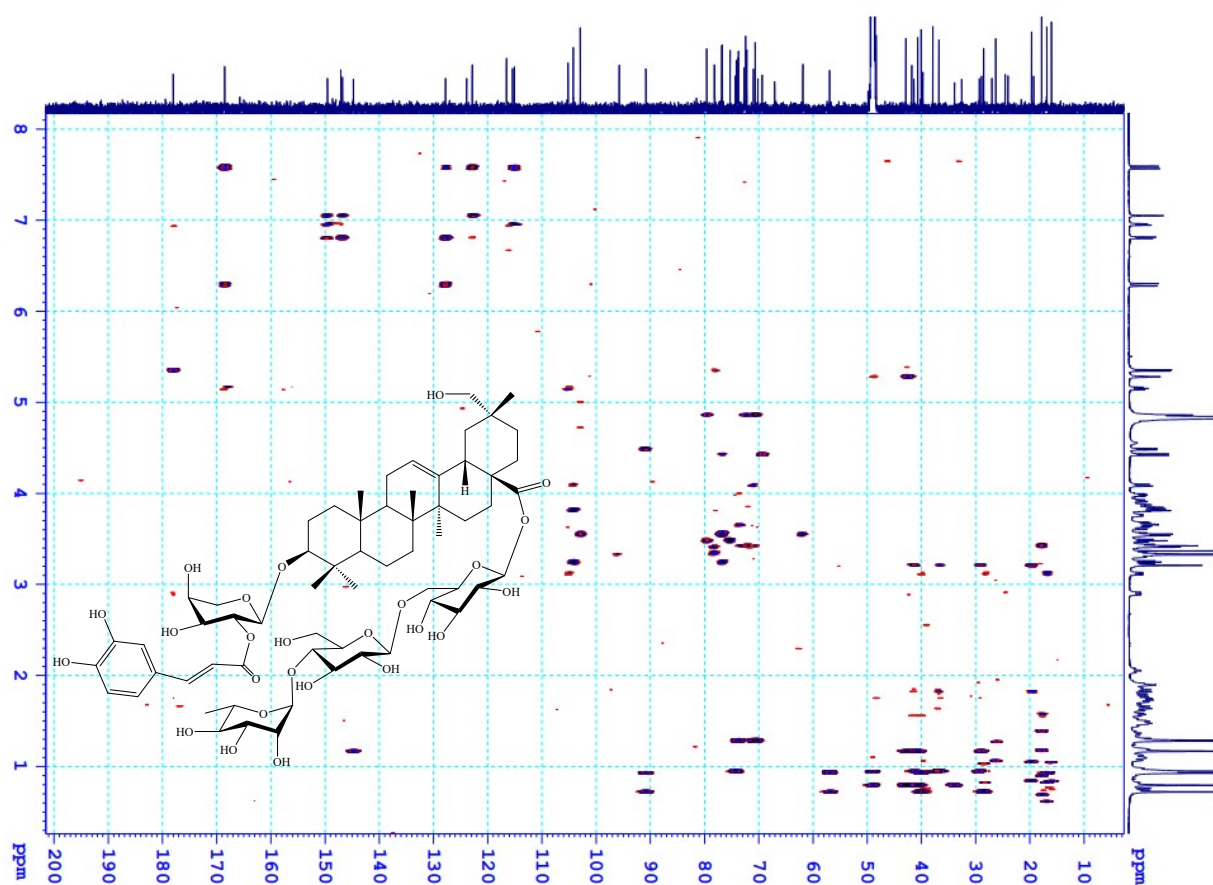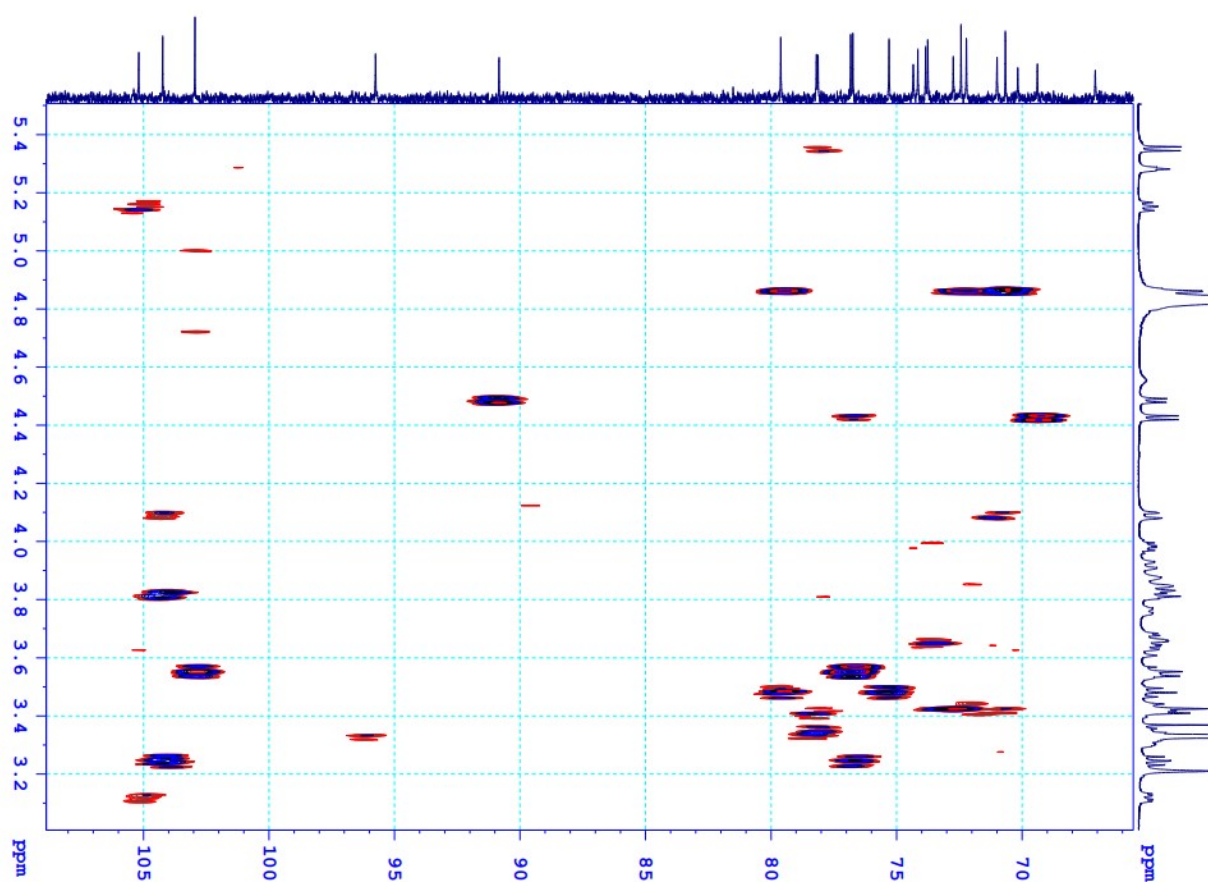

Figure S38. HMBC spectrum of compound 4 in CD<sub>3</sub>OD



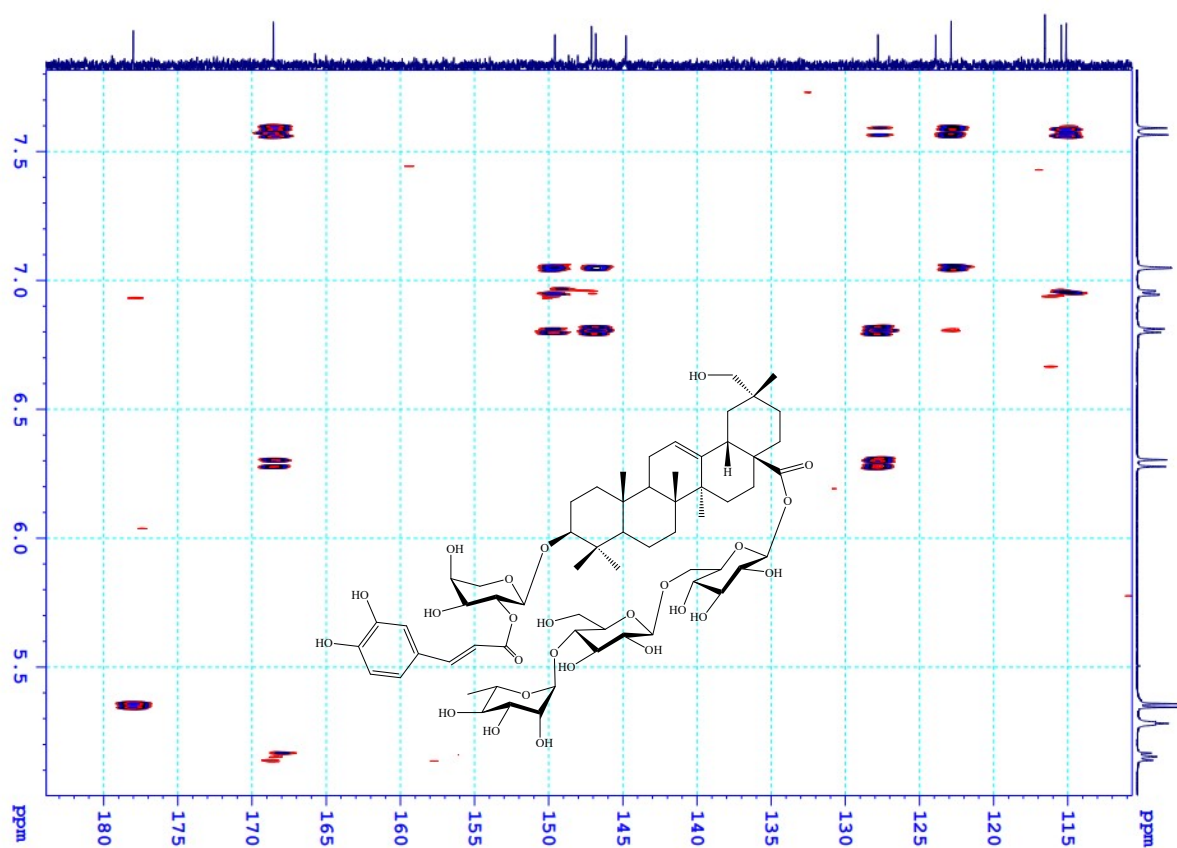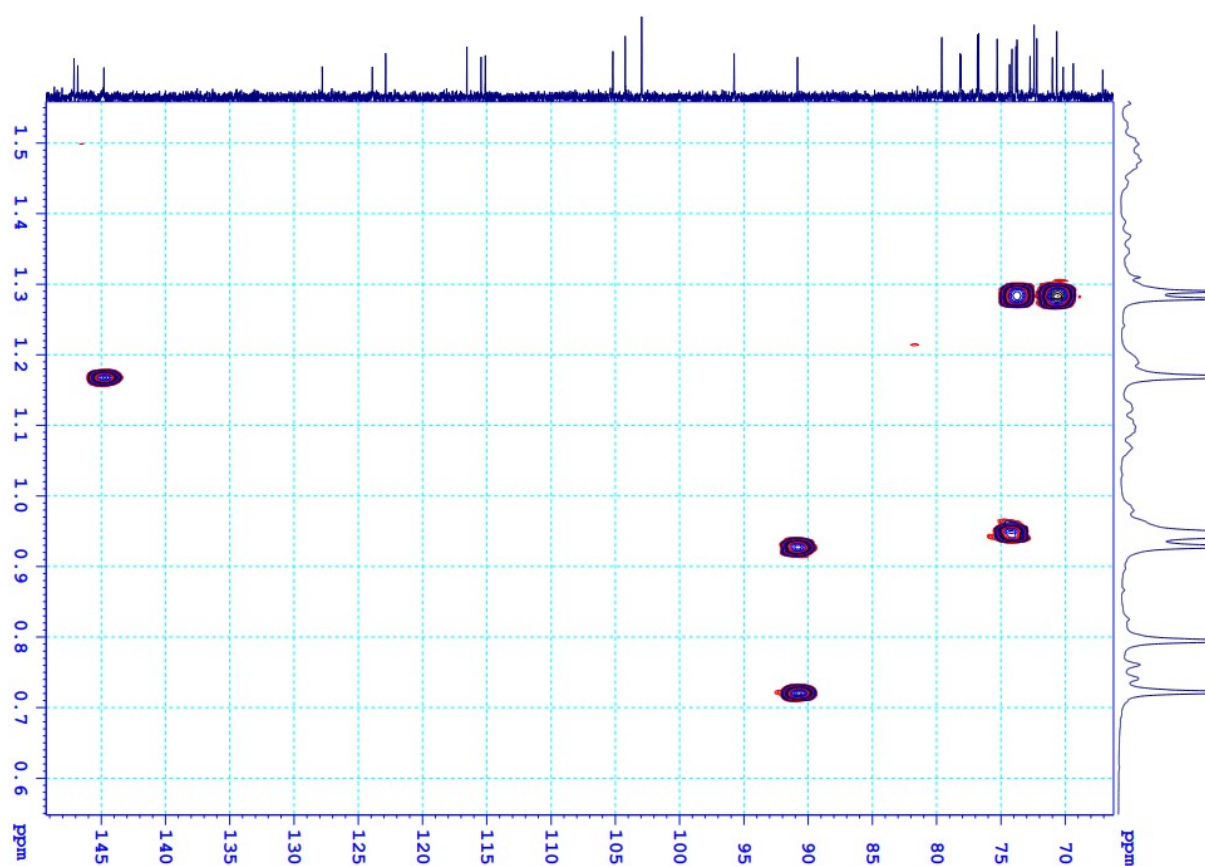

Figure S39. Extended HMBC spectrum of compound **4** in CD<sub>3</sub>OD

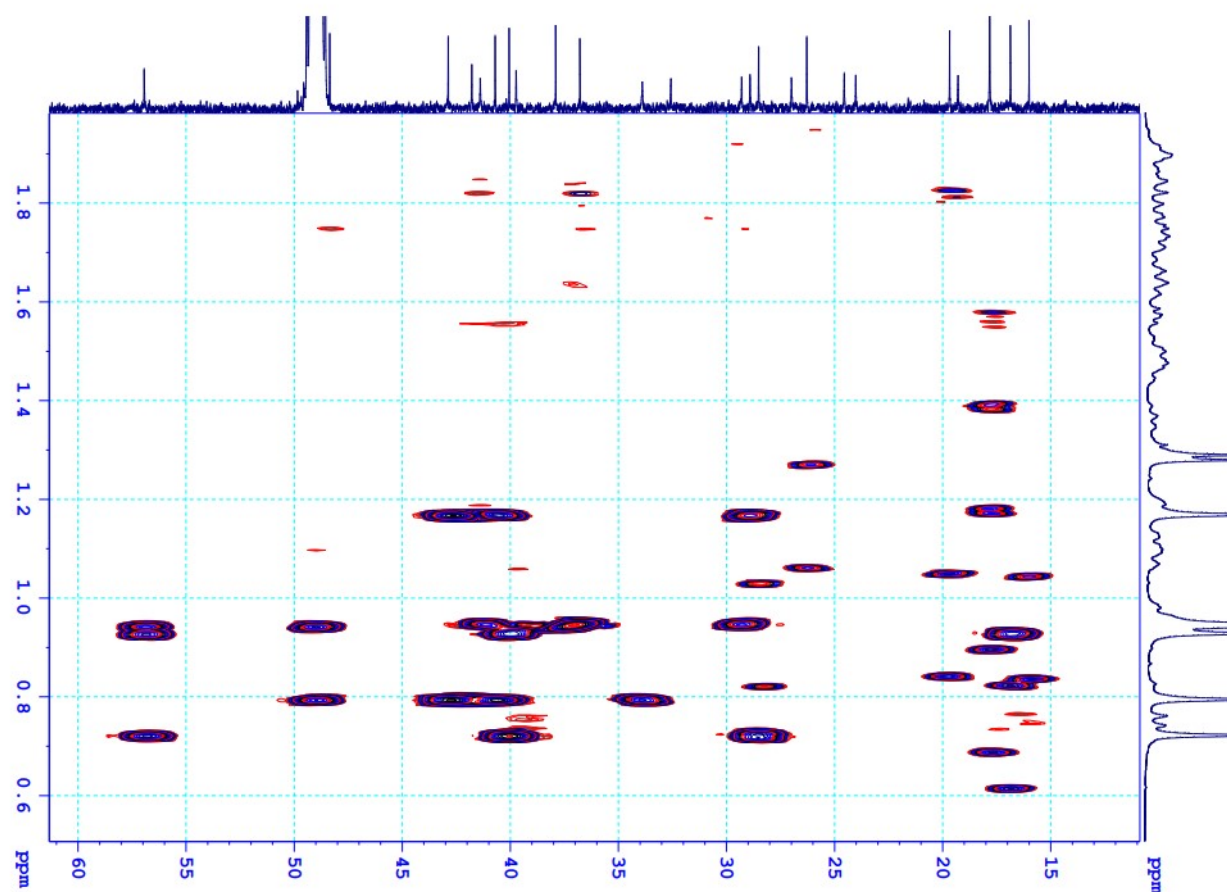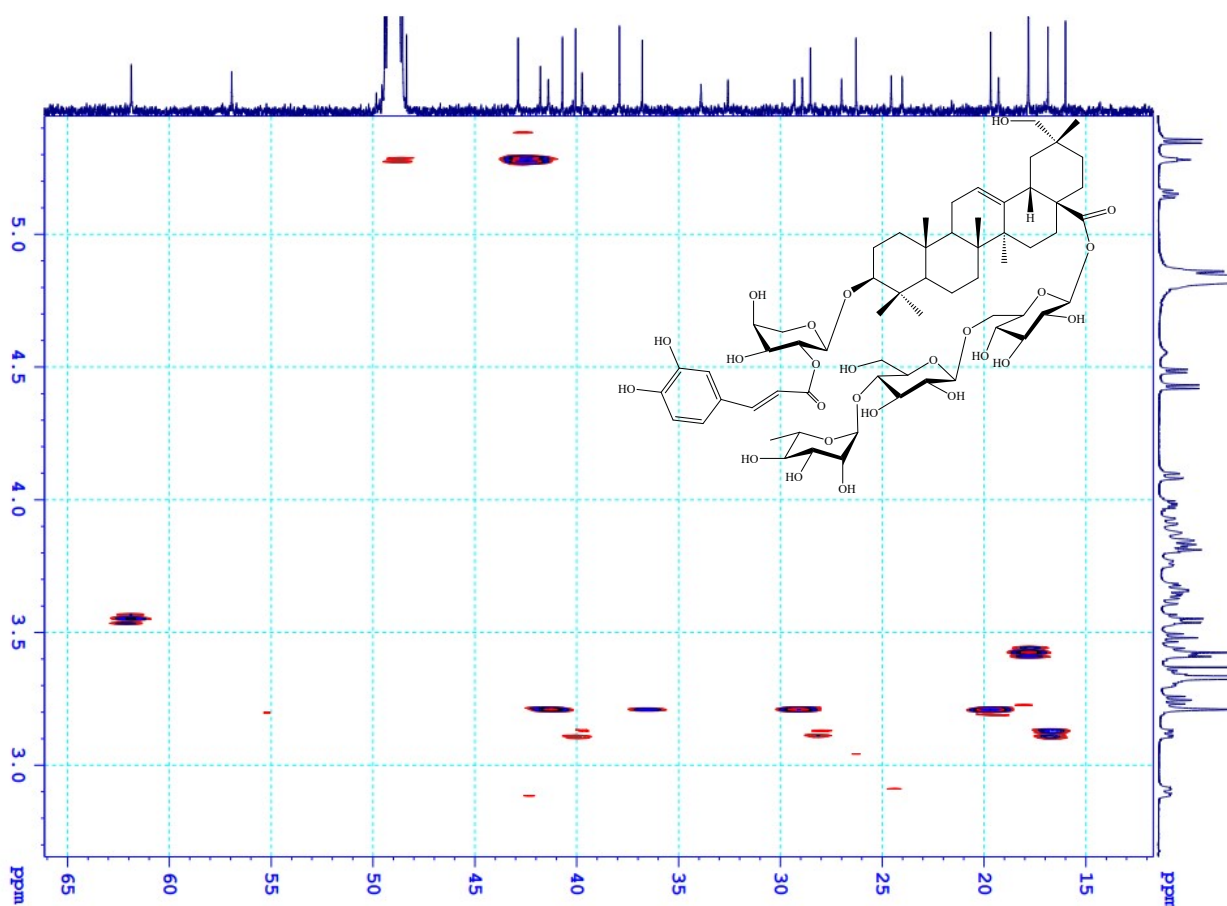

Figure S40. Extended HMBC spectrum of compound 4 in CD<sub>3</sub>OD

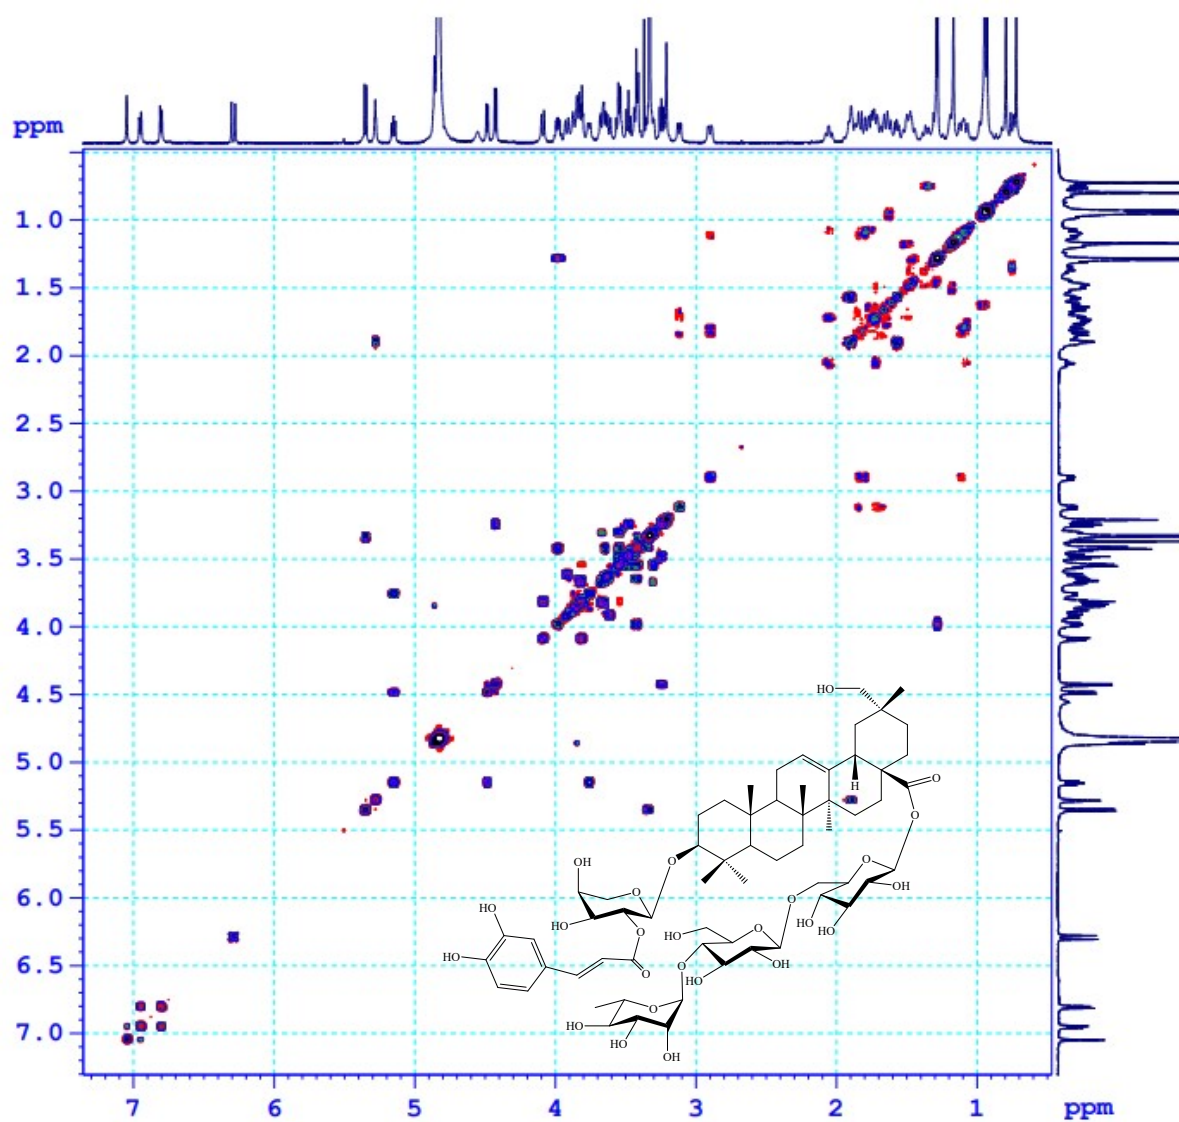

Figure S41. COSY spectrum of compound **4** in CD<sub>3</sub>OD

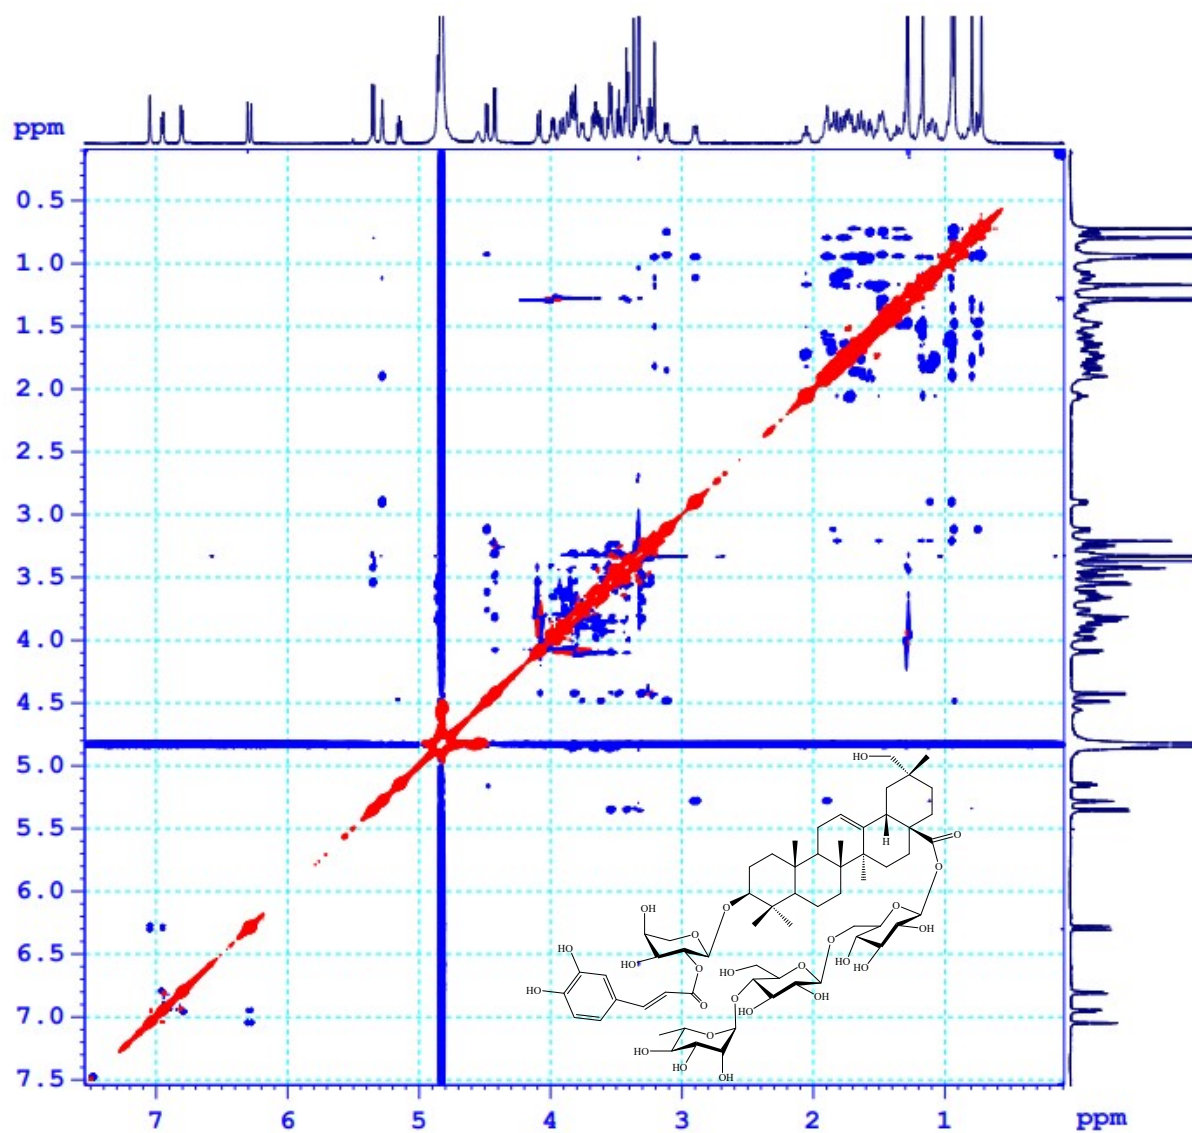

Figure S42. NOESY spectrum of compound **4** in CD<sub>3</sub>OD

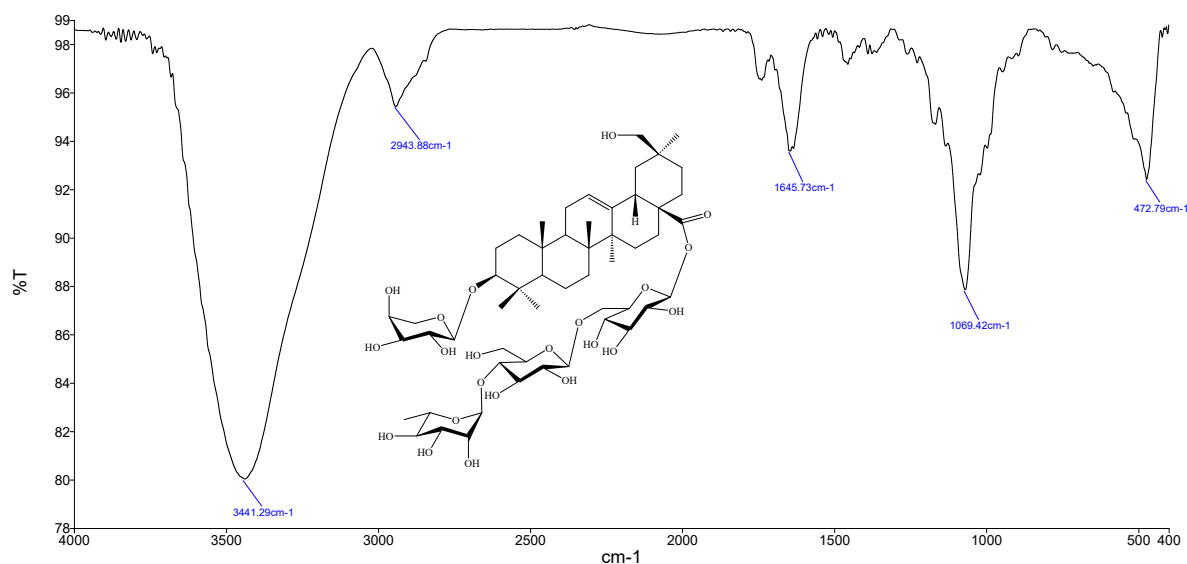

Figure S43. IR spectrum of compound **5**

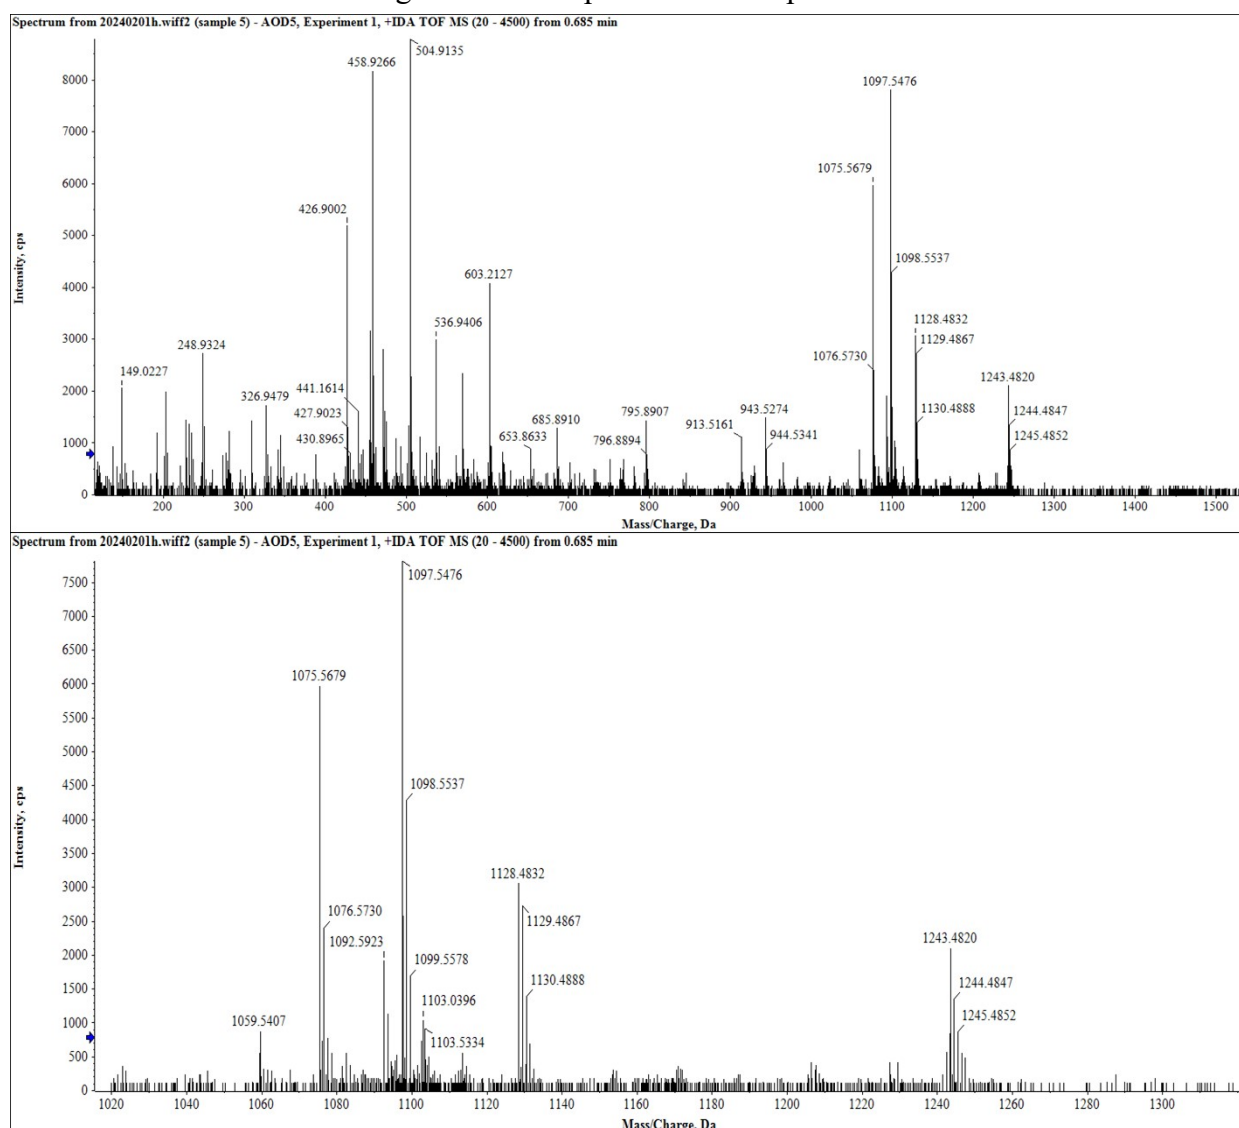

HR-ESI-MS  $m/z$  1075.5679  $[\text{M}+\text{H}]^+$ , (calcd. for  $[\text{C}_{53}\text{H}_{87}\text{O}_{22}]^+$ , 1075.5684,  $\Delta=-0.5$  ppm),  $m/z$  1097.5476  $[\text{M}+\text{Na}]^+$ , (calcd. for  $[\text{C}_{53}\text{H}_{86}\text{O}_{22}\text{Na}]^+$ , 1097.5503,  $\Delta=-2.5$  ppm)

Figure S44. HR-ESI-MS spectrum of compound **5**

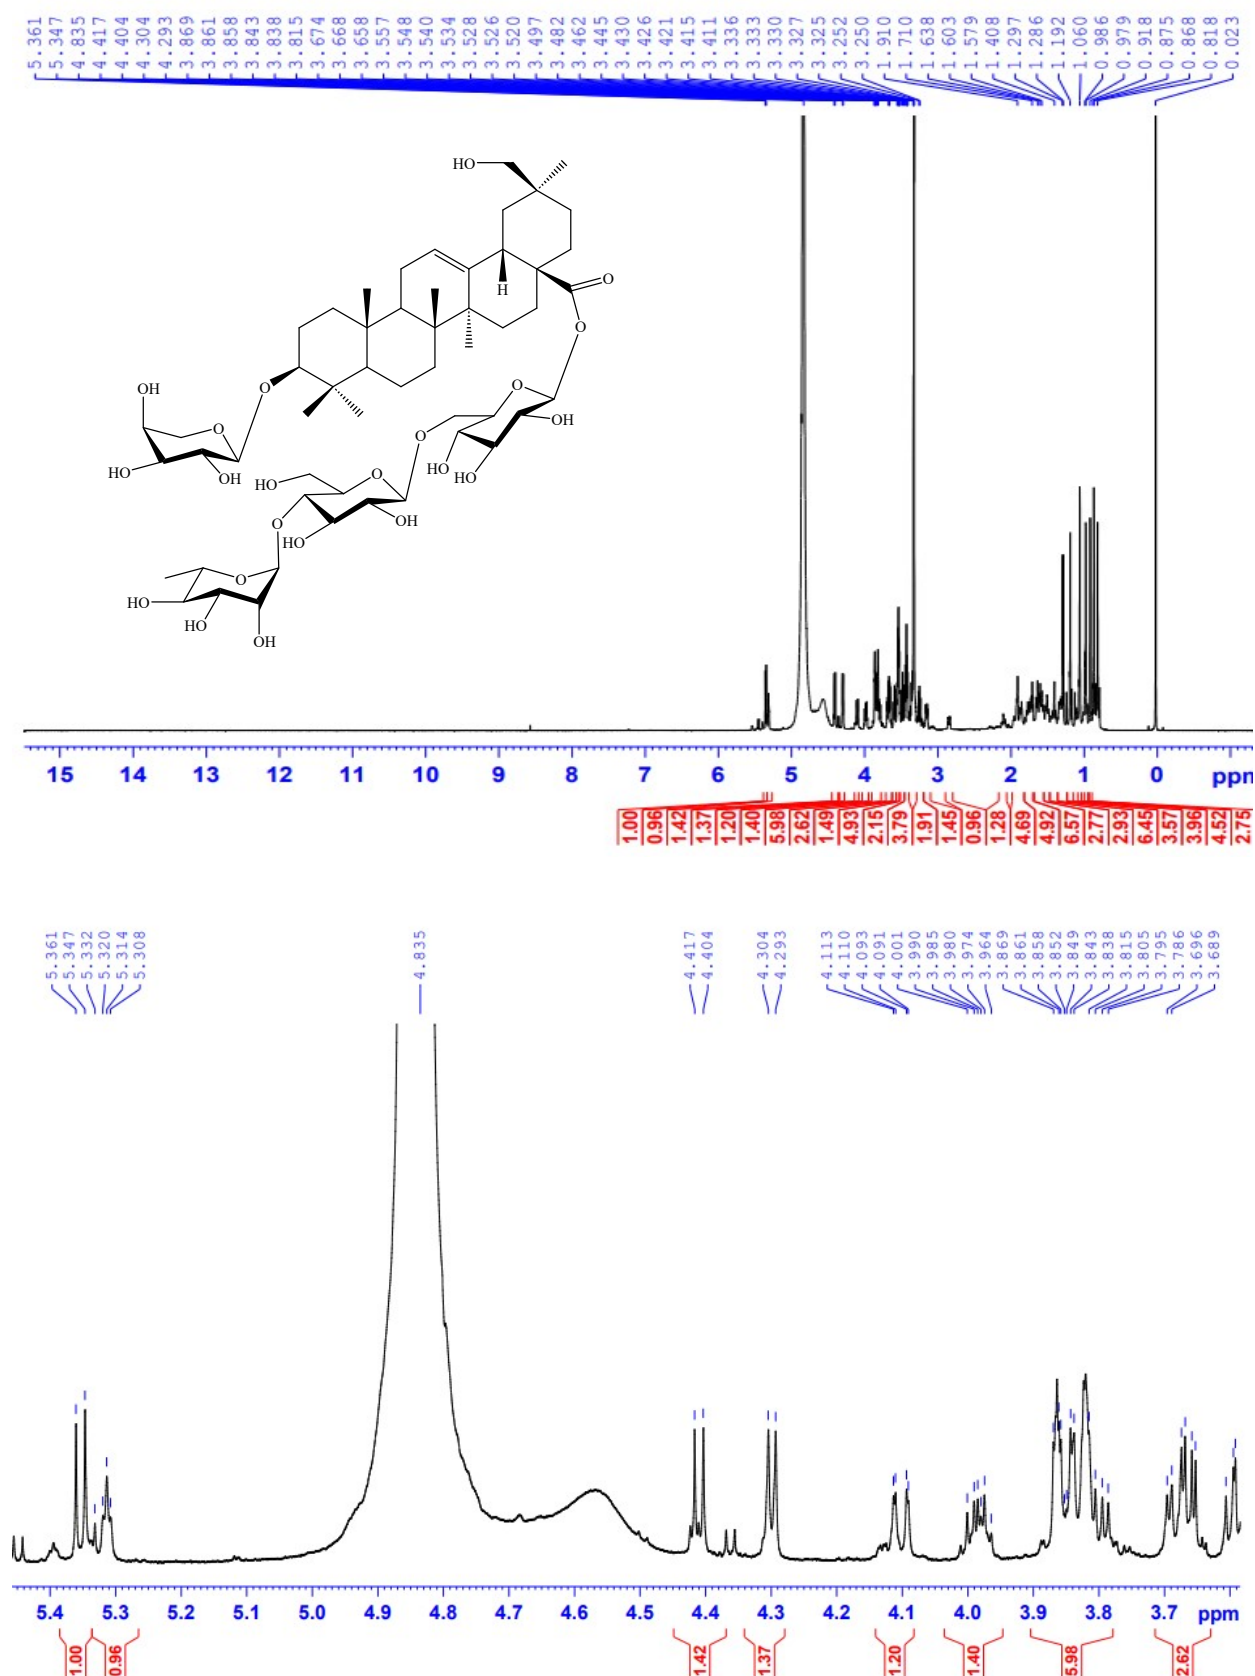

Figure S45.  $^1\text{H}$  NMR spectrum of compound **5** in  $\text{CD}_3\text{OD}$

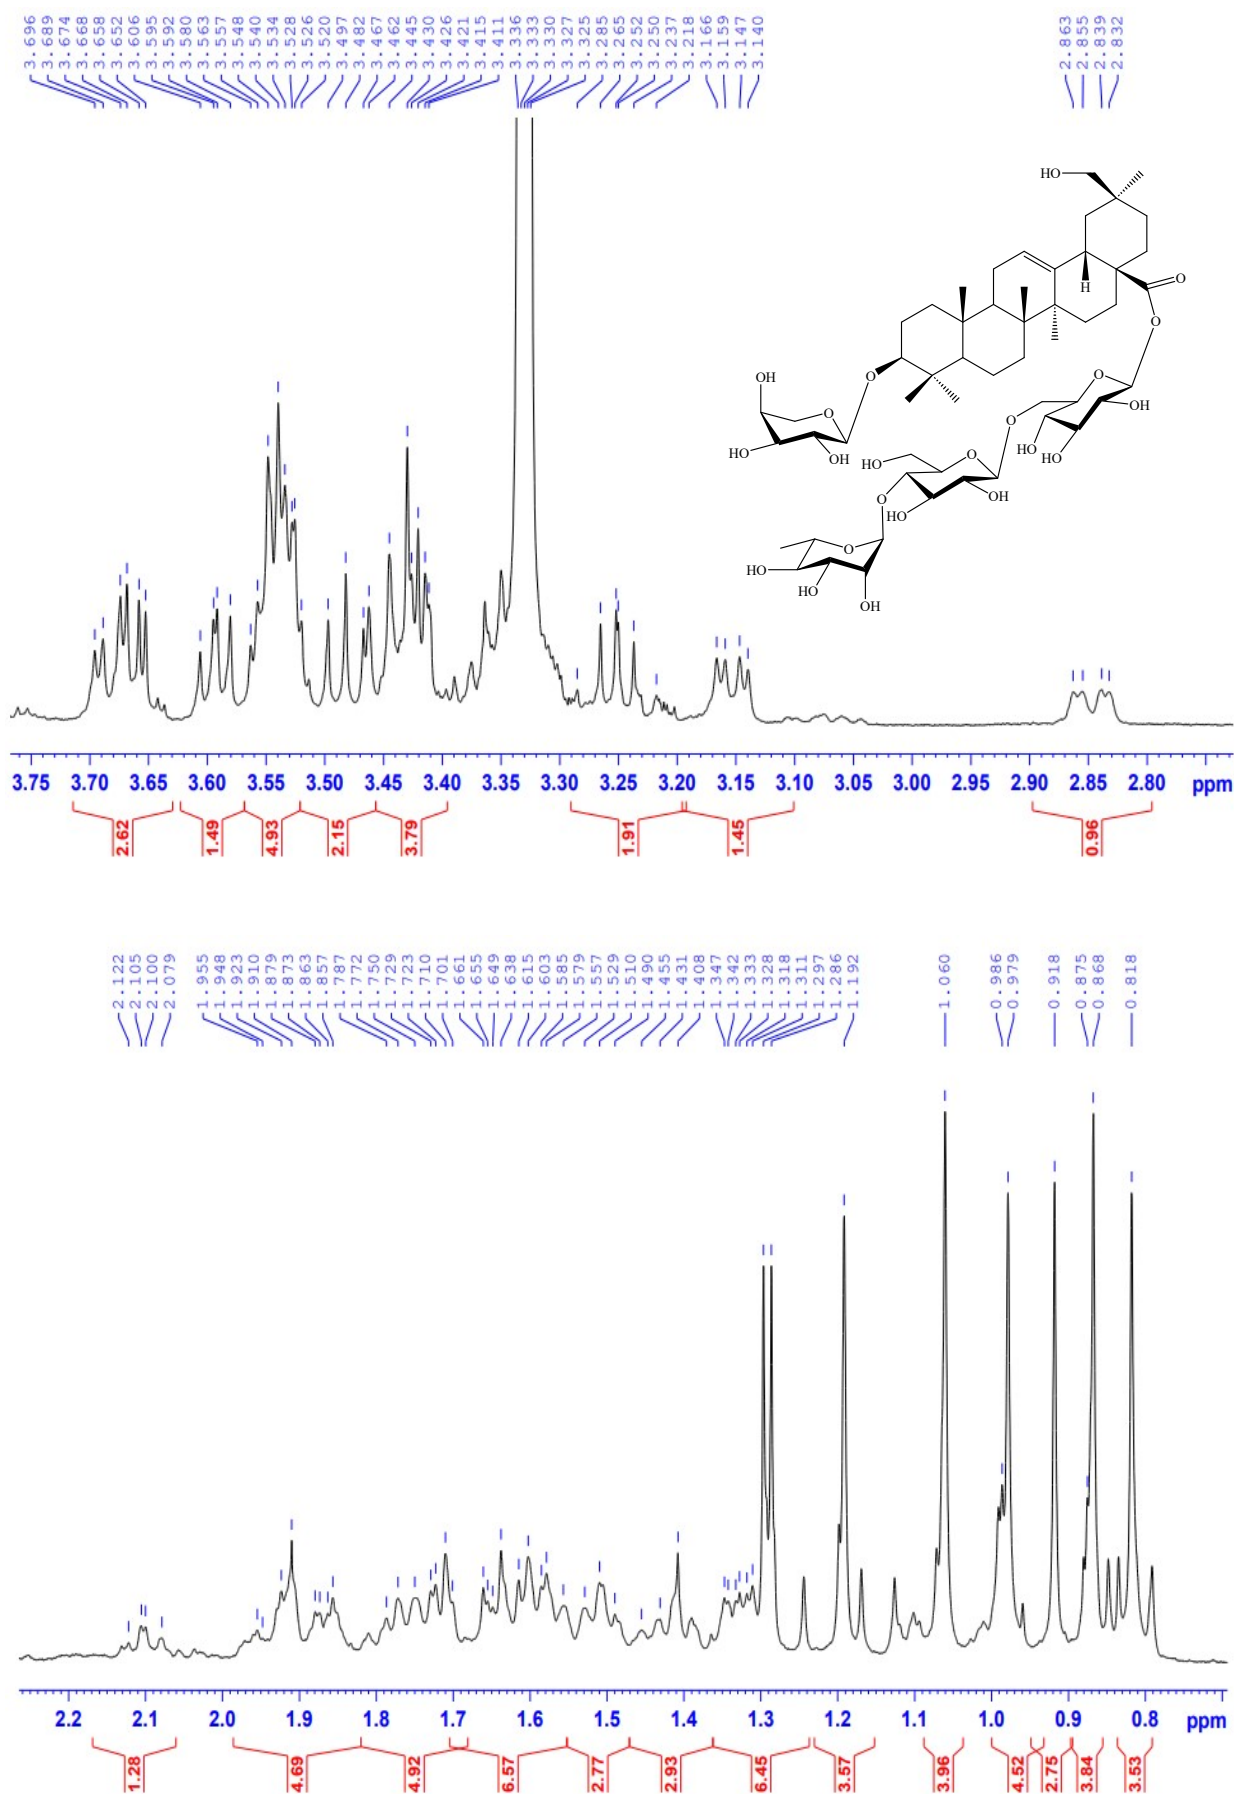

Figure S46. Extended  $^1\text{H}$  NMR spectrum of compound **5** in  $\text{CD}_3\text{OD}$

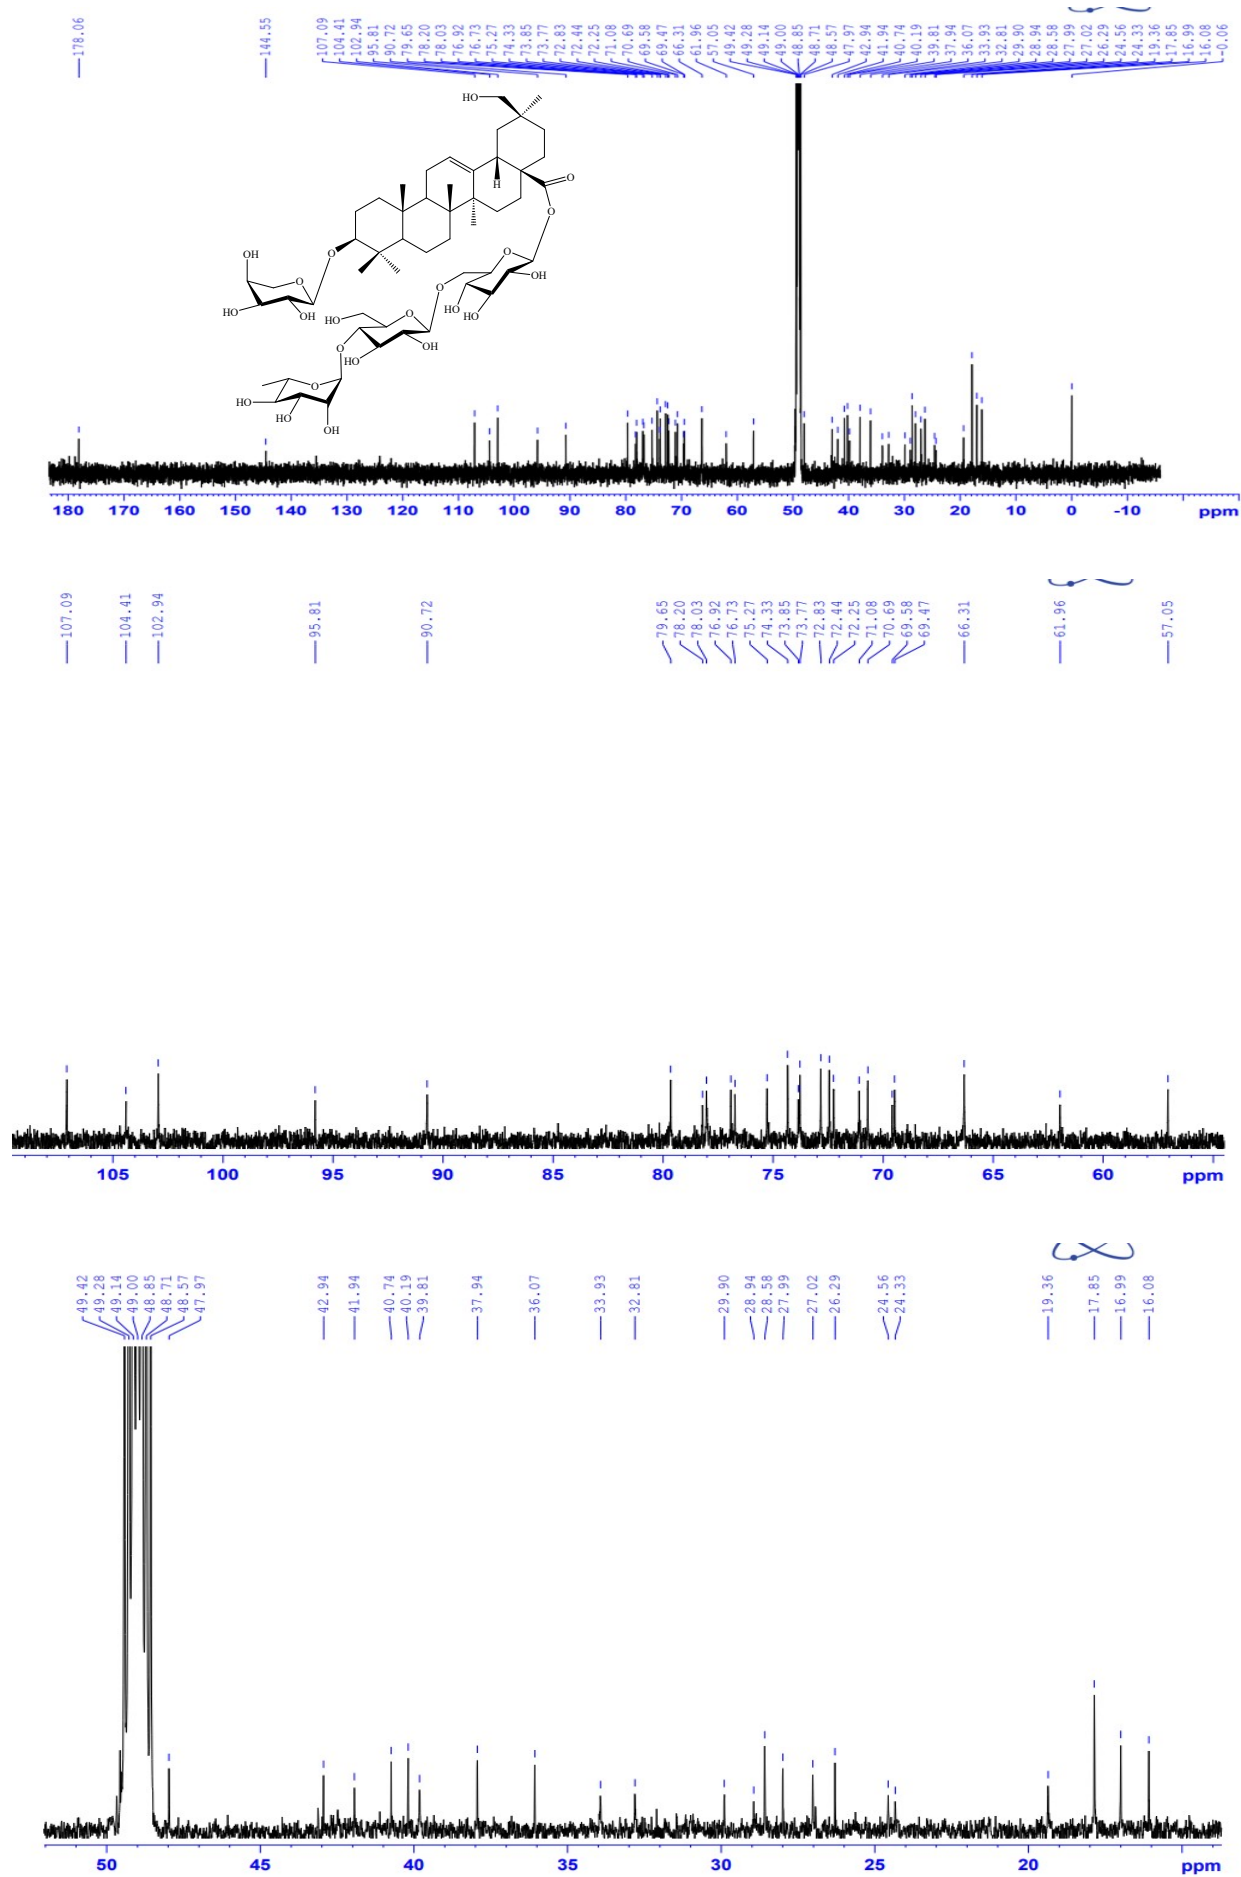

Figure S47.  $^{13}\text{C}$  NMR spectrum of compound 5 in  $\text{CD}_3\text{OD}$

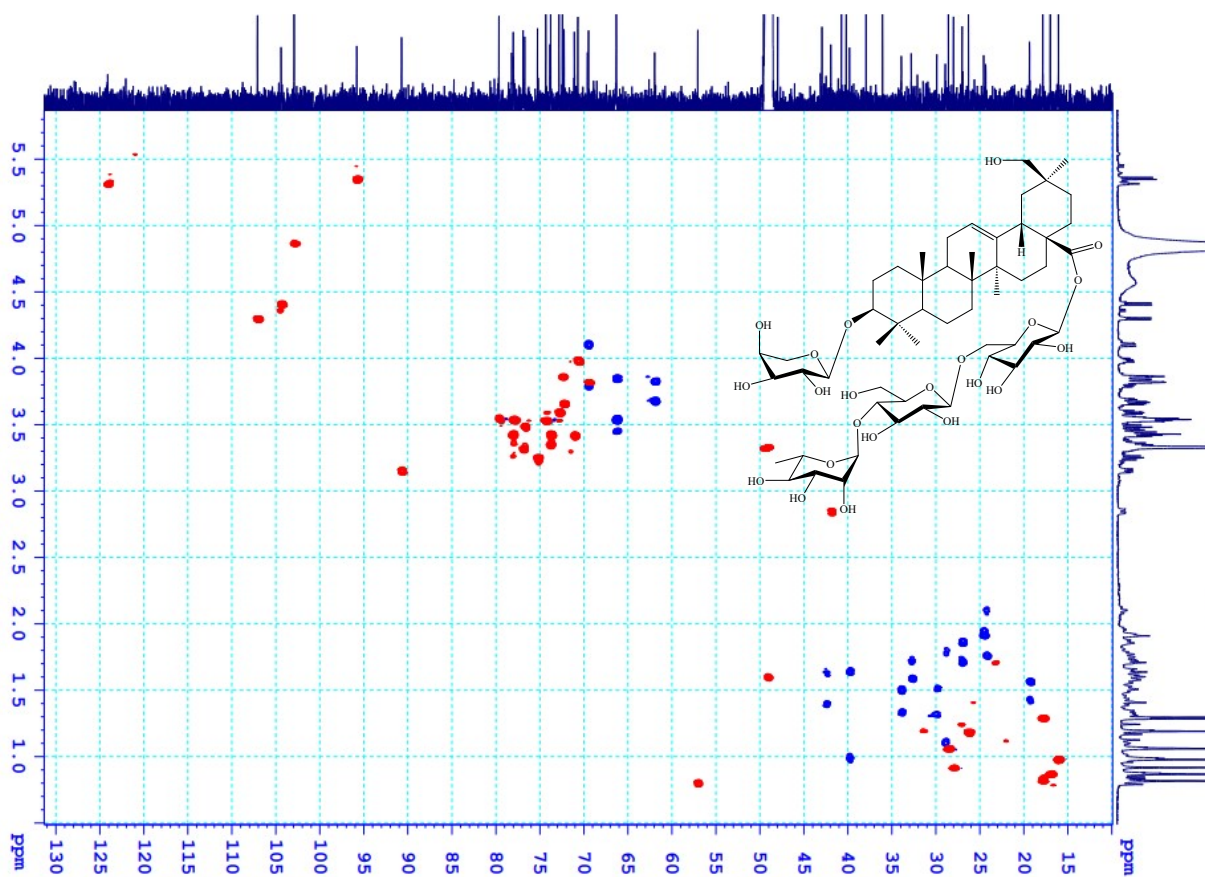

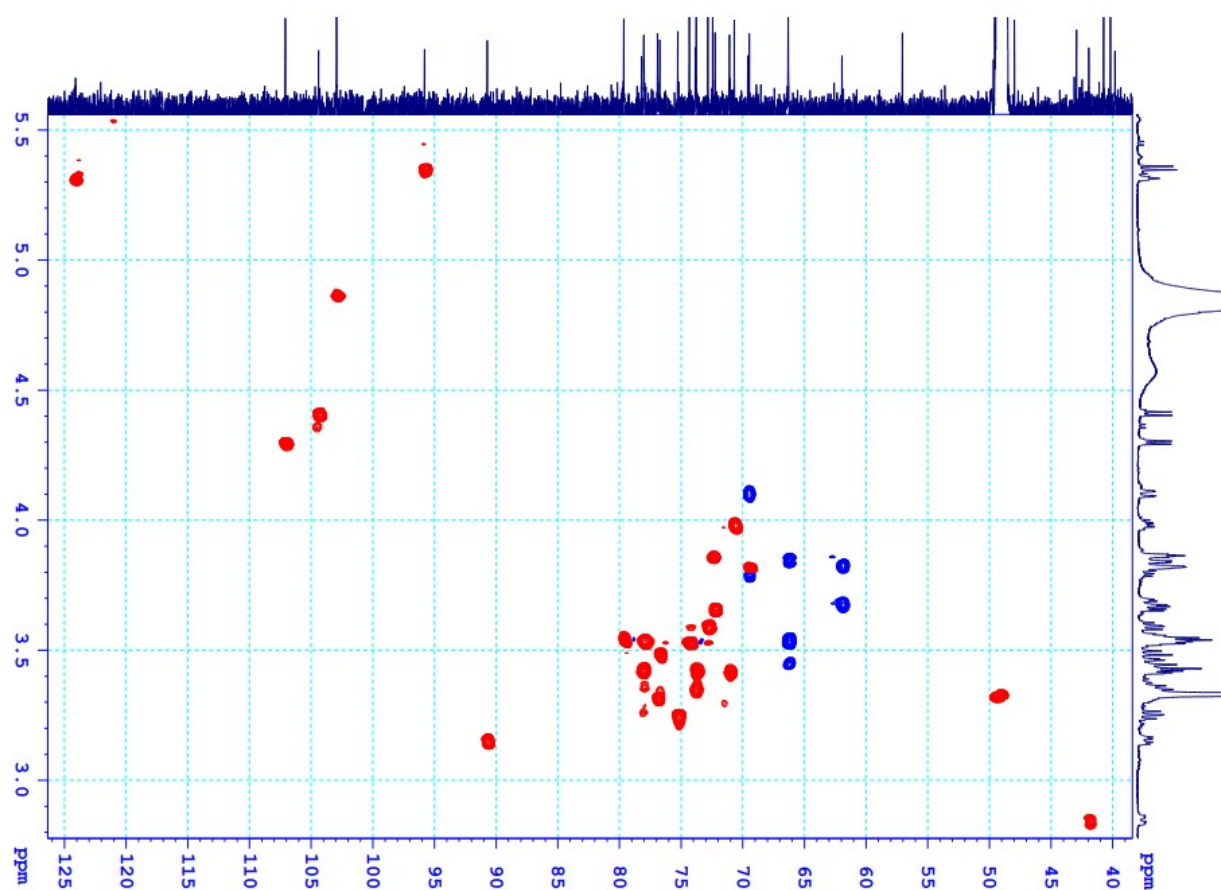

Figure S48. HSQC spectrum of compound **5** in  $\text{CD}_3\text{OD}$

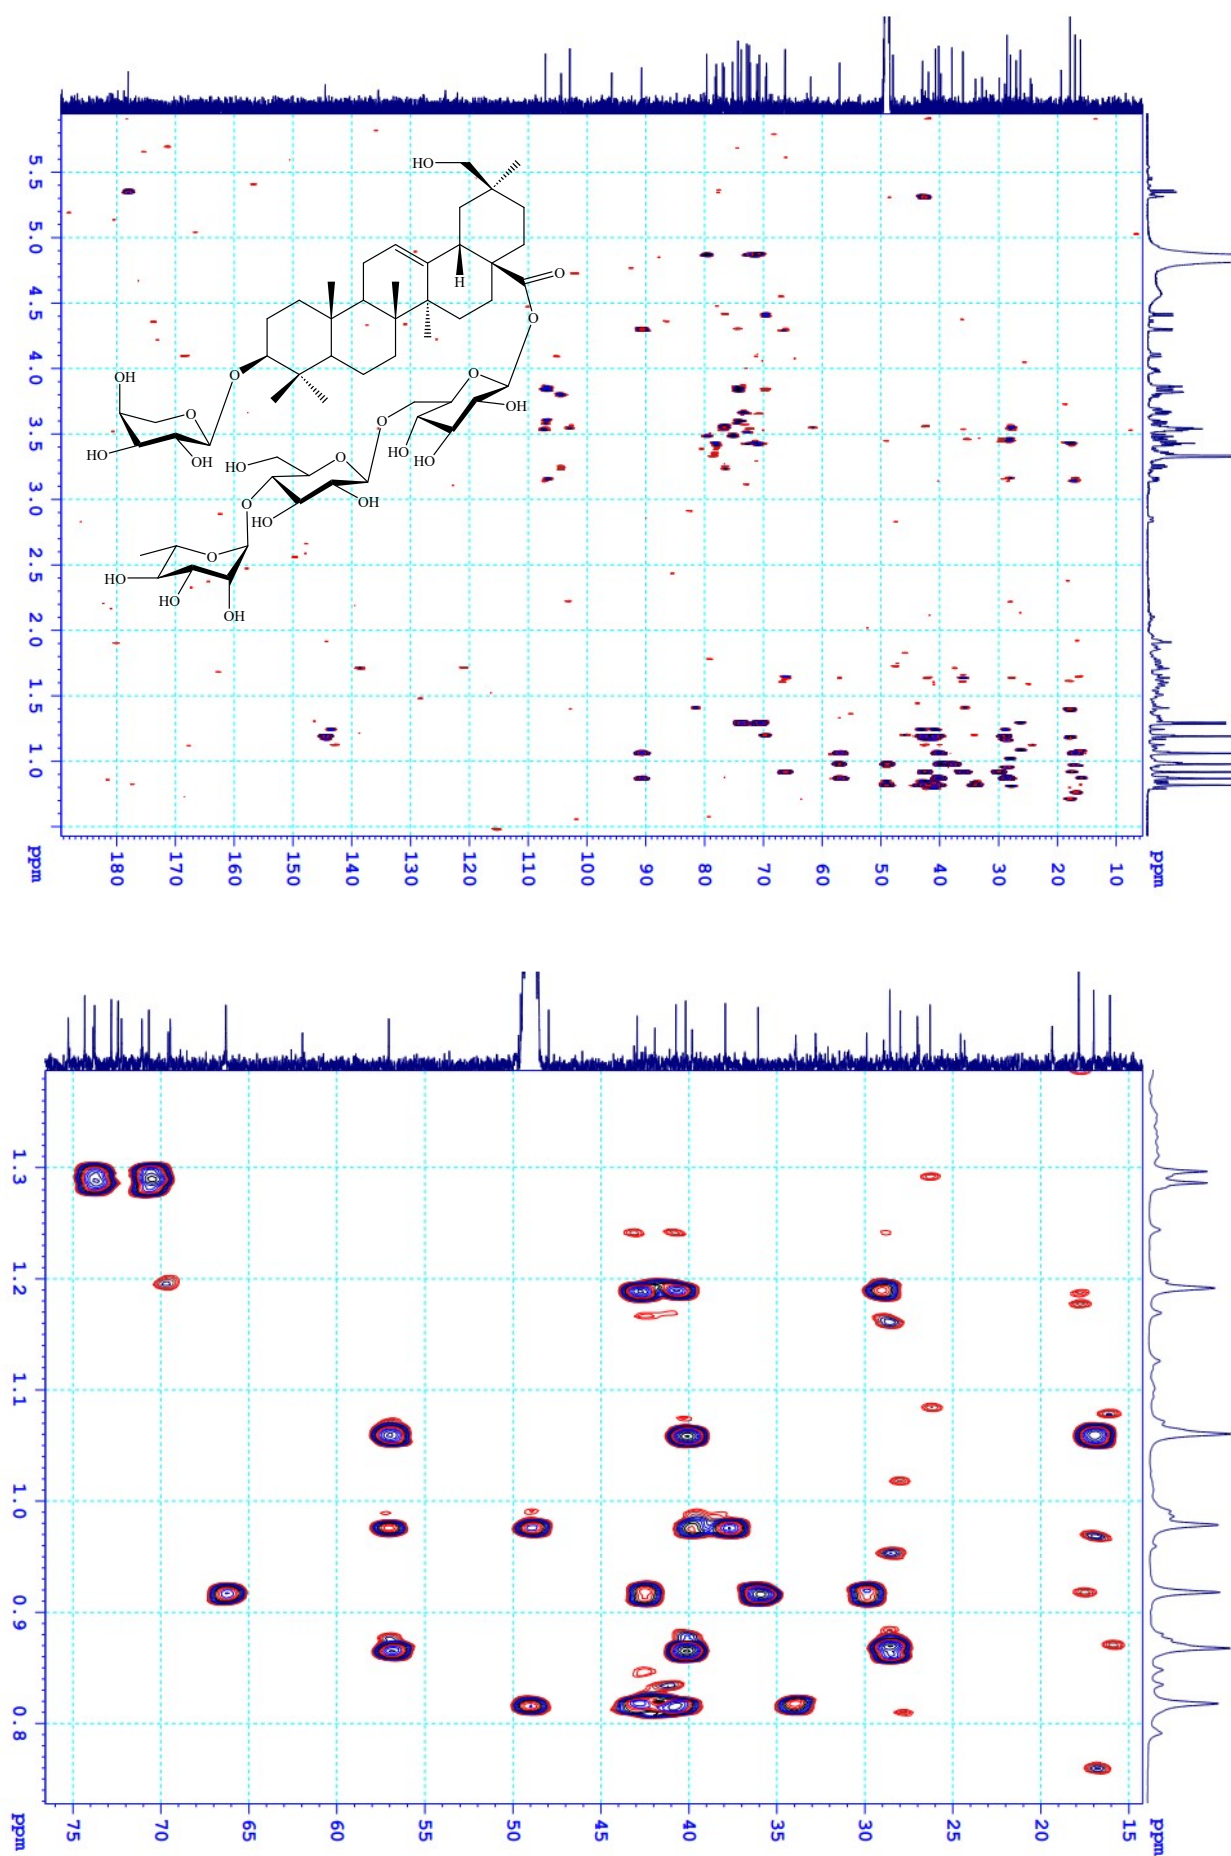

Figure S49. HMBC spectrum of compound **5** in CD<sub>3</sub>OD

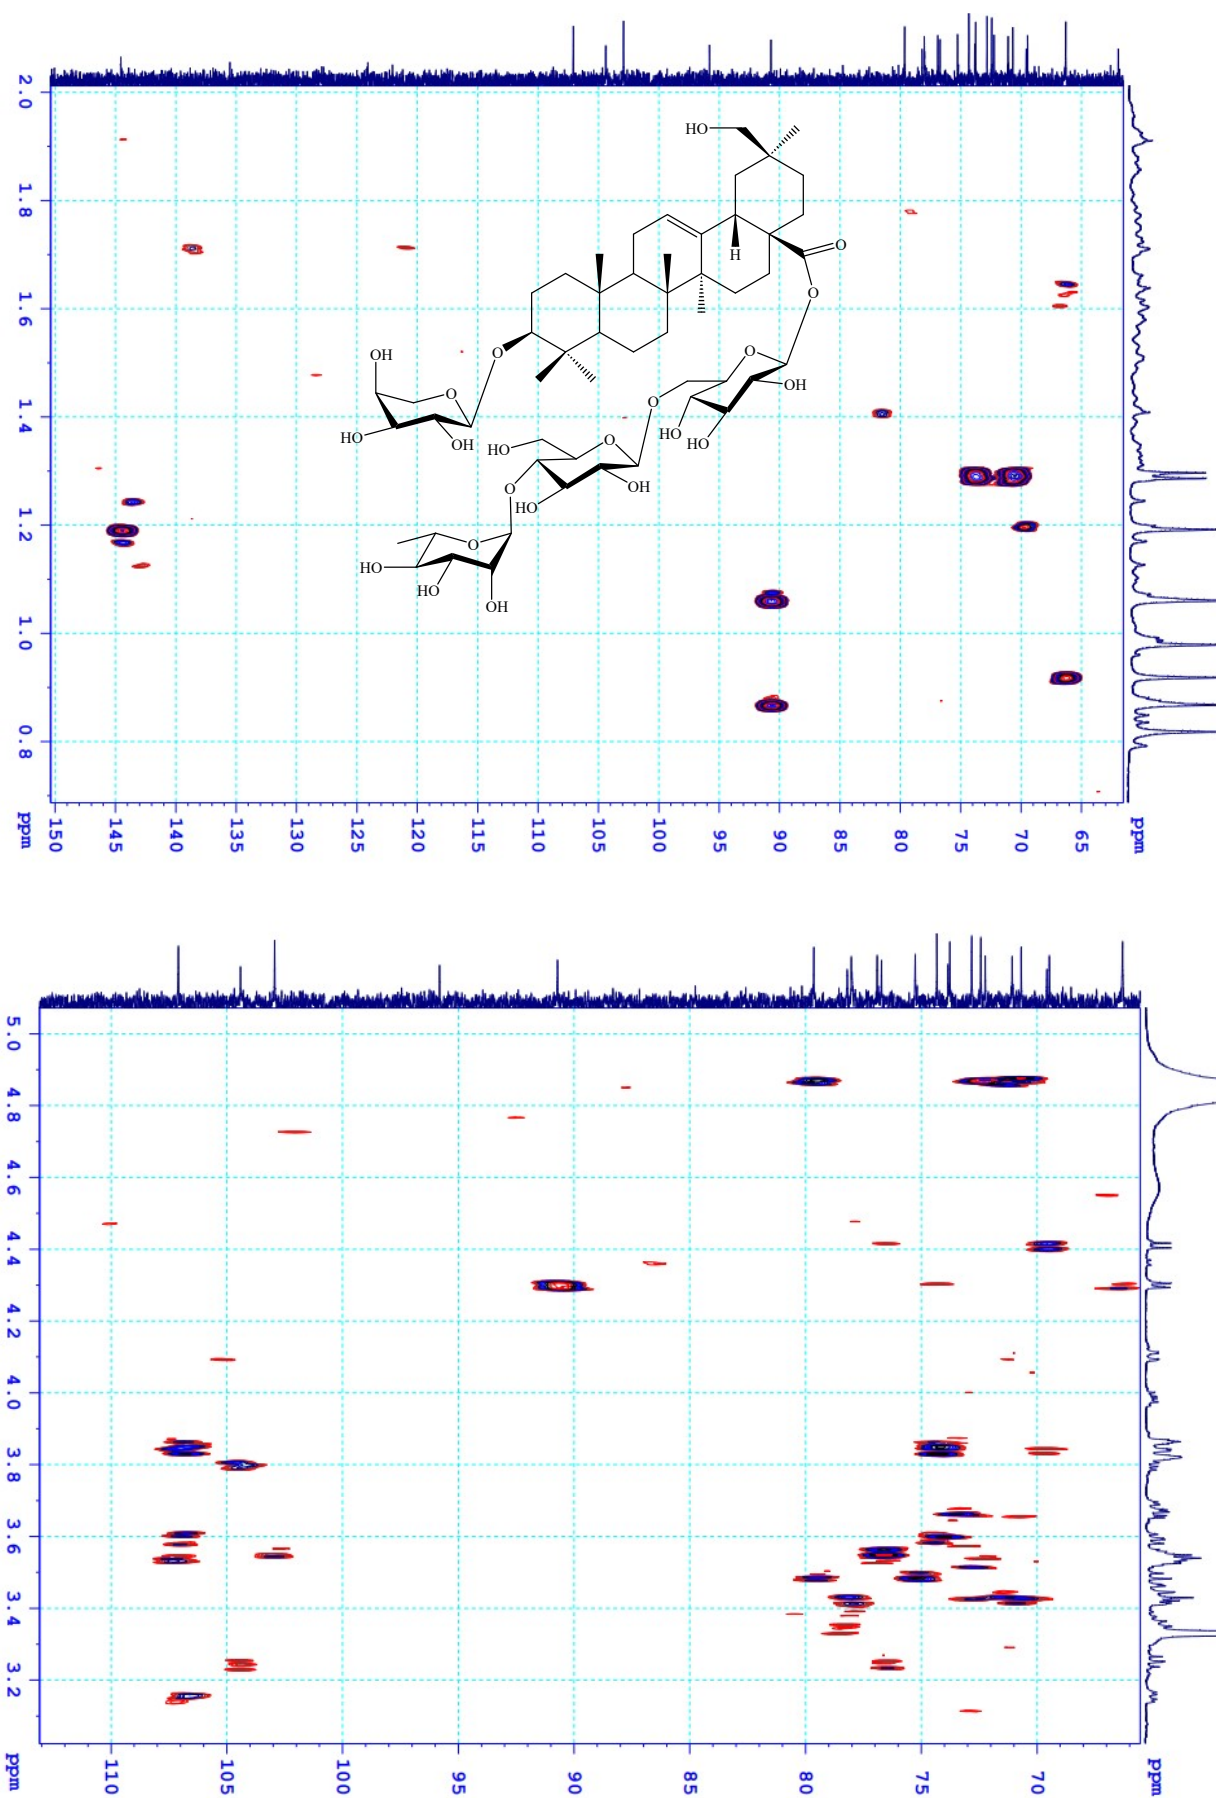

Figure S50. Extended HMBC spectrum of compound **5** in CD<sub>3</sub>OD

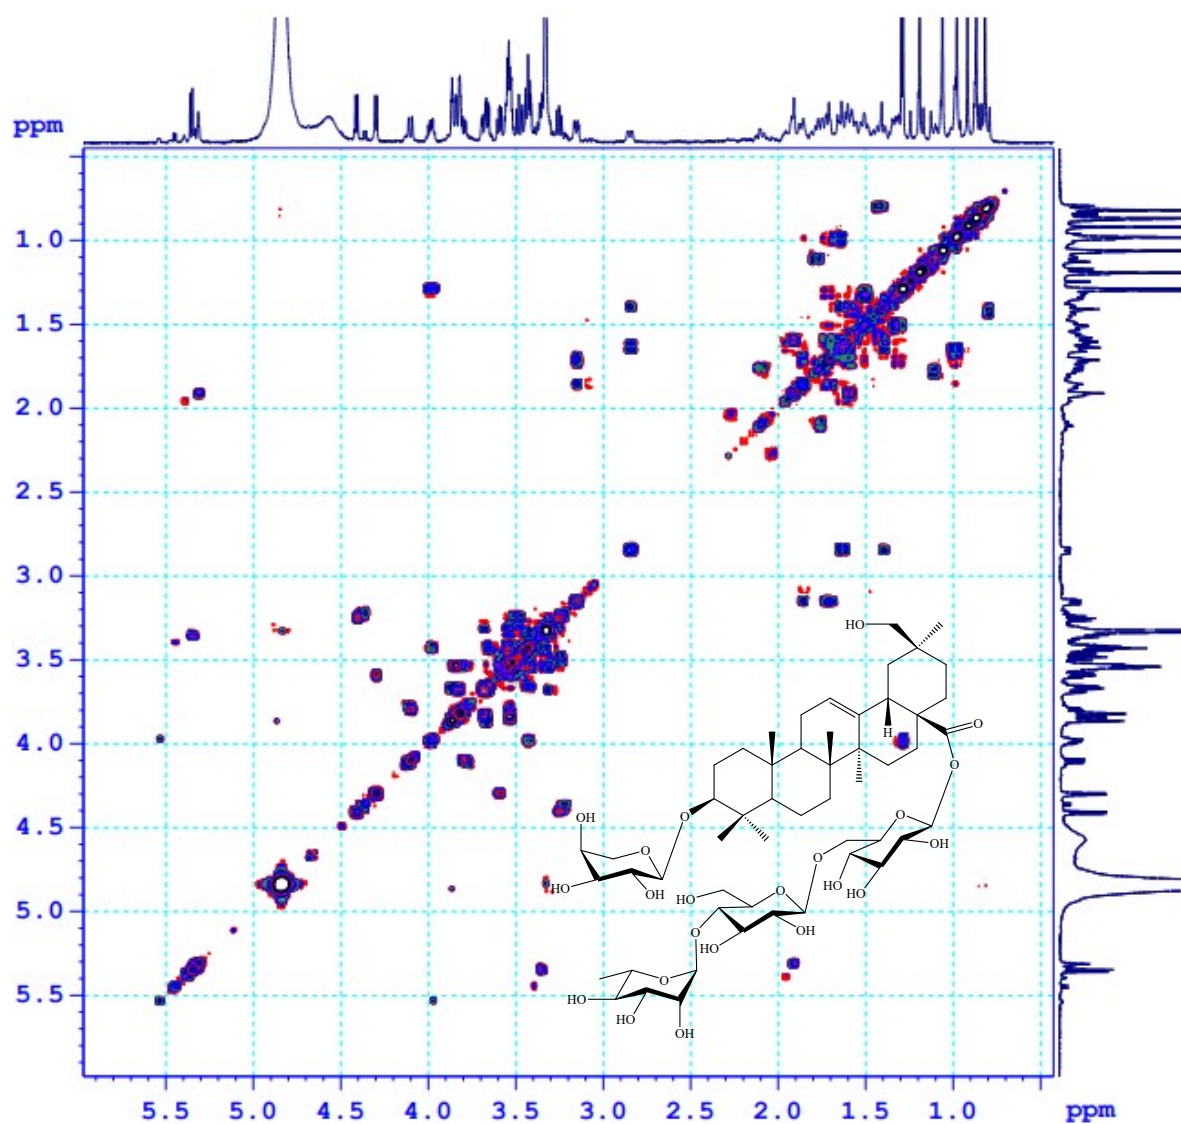

Figure S51. COSY spectrum of compound **5** in CD<sub>3</sub>OD

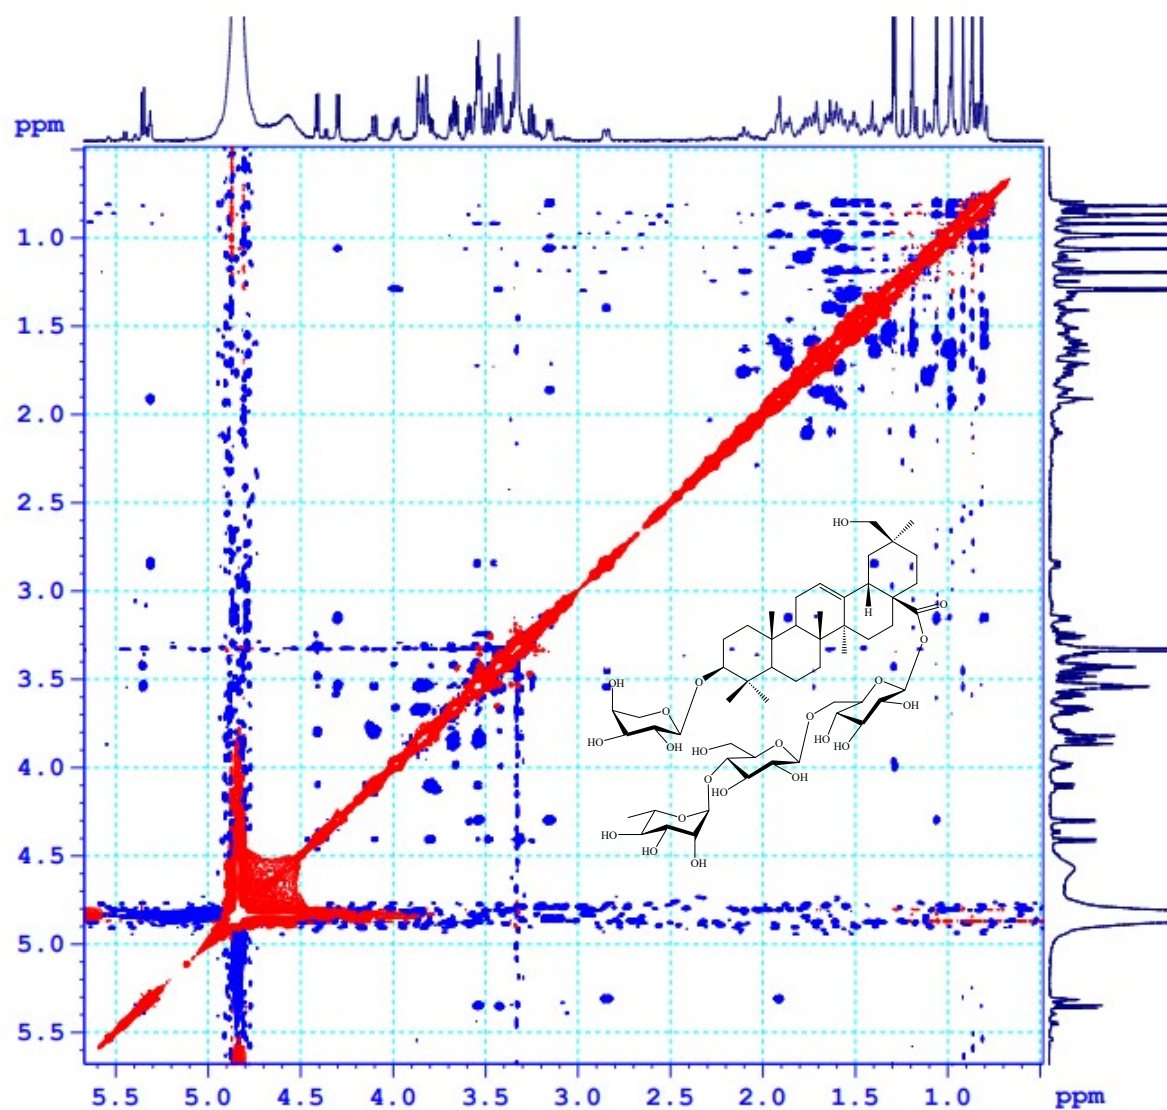

Figure S52. NOESY spectrum of compound **5** in CD<sub>3</sub>OD

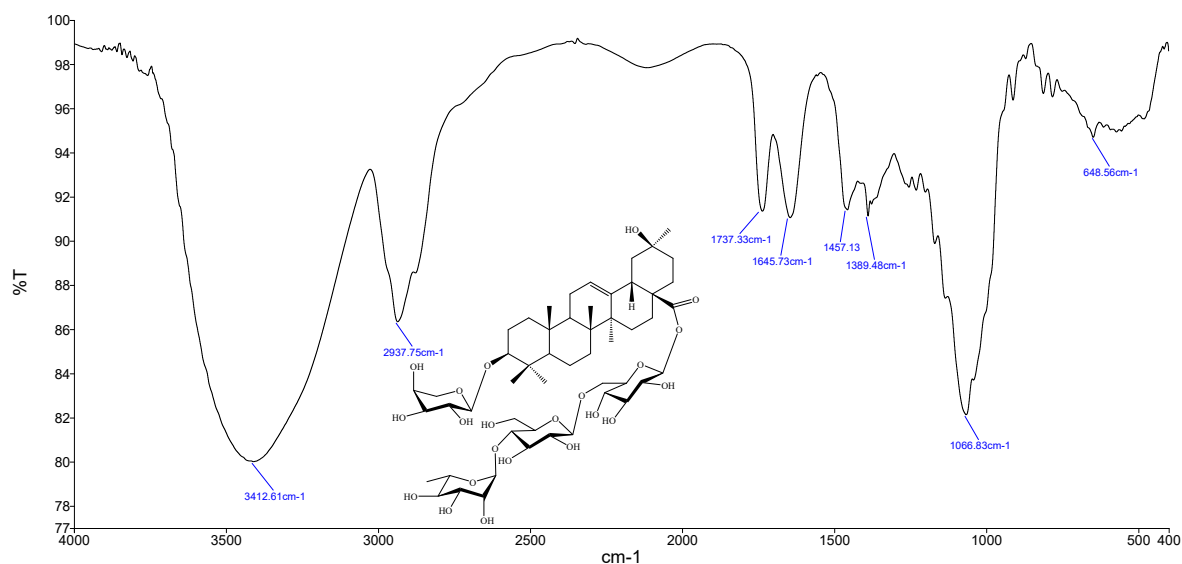

Figure S53. IR spectrum of compound **6**

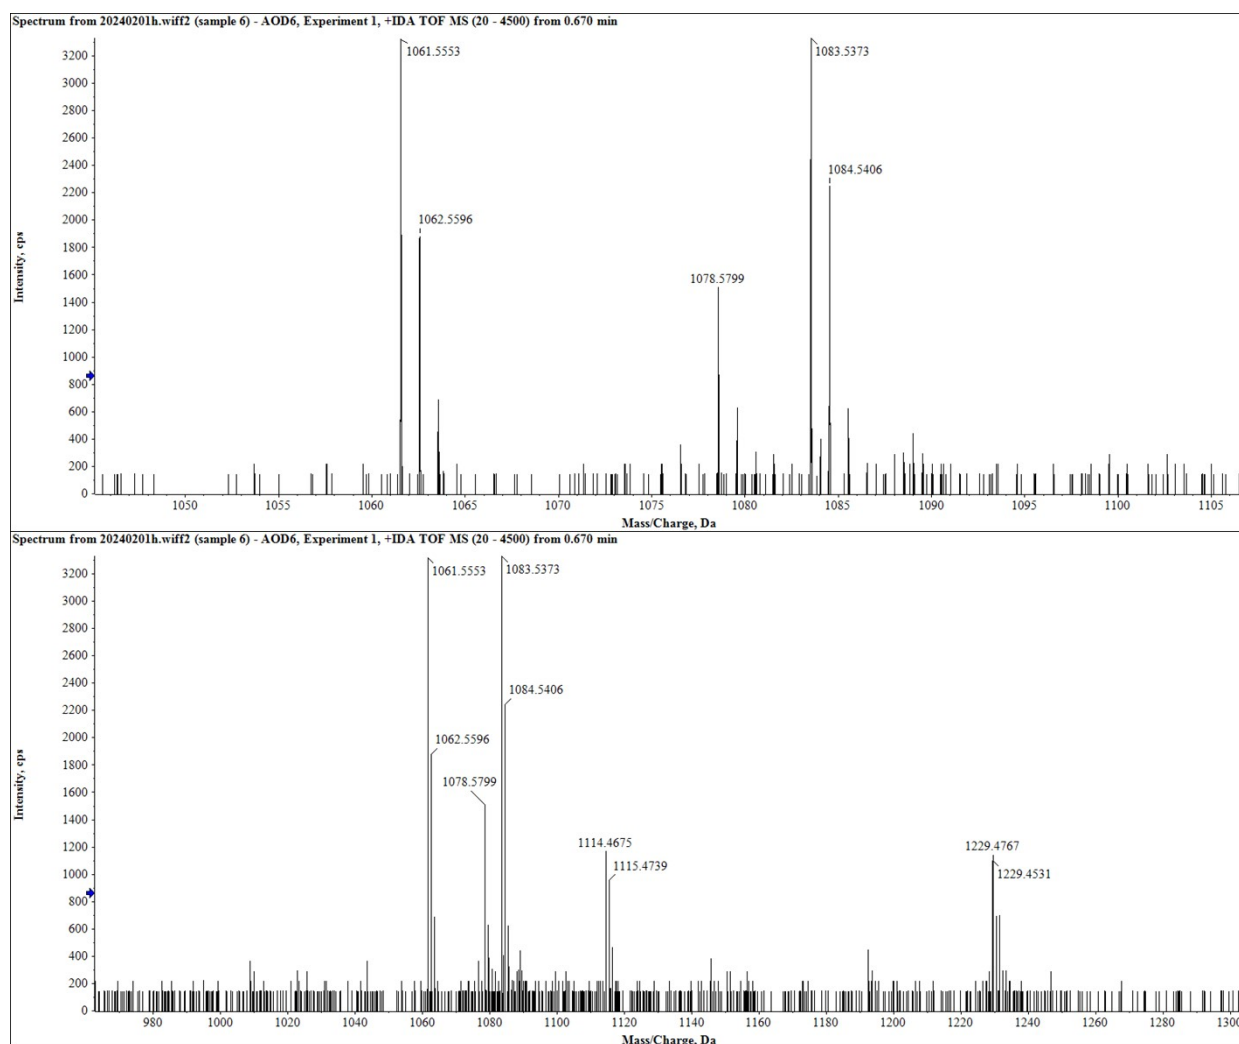

HR-ESI-MS  $m/z$  1061.5553  $[M+H]^+$ , (calcd. for  $[C_{52}H_{85}O_{22}]^+$ , 1061.5527,  $\Delta=+2.5$  ppm),  $m/z$  1083.5373  $[M+Na]^+$ , (calcd. for  $[C_{52}H_{84}O_{22}Na]^+$ , 1083.5347,  $\Delta=+2.4$  ppm)

Figure S54. HR-ESI-MS spectrum of compound **6**

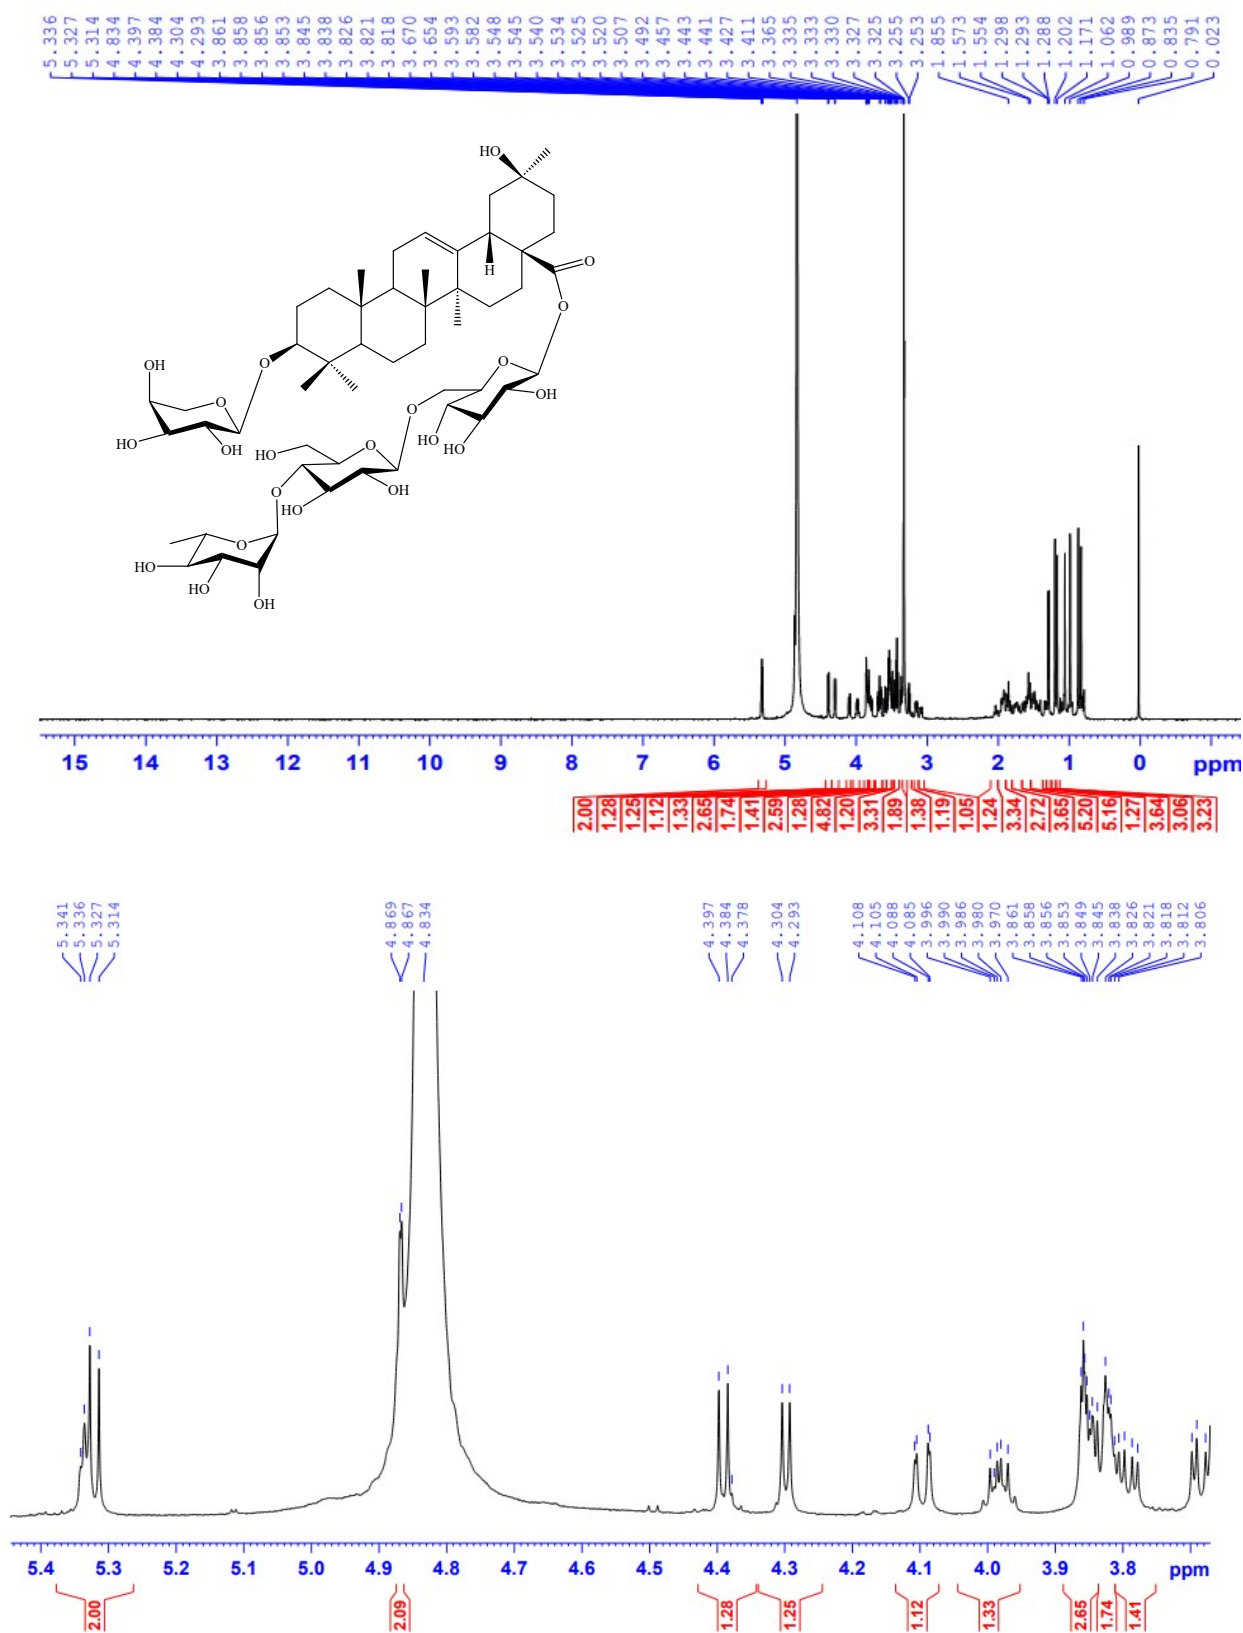

Figure S55.  $^1\text{H}$  NMR spectrum of compound 6 in  $\text{CD}_3\text{OD}$

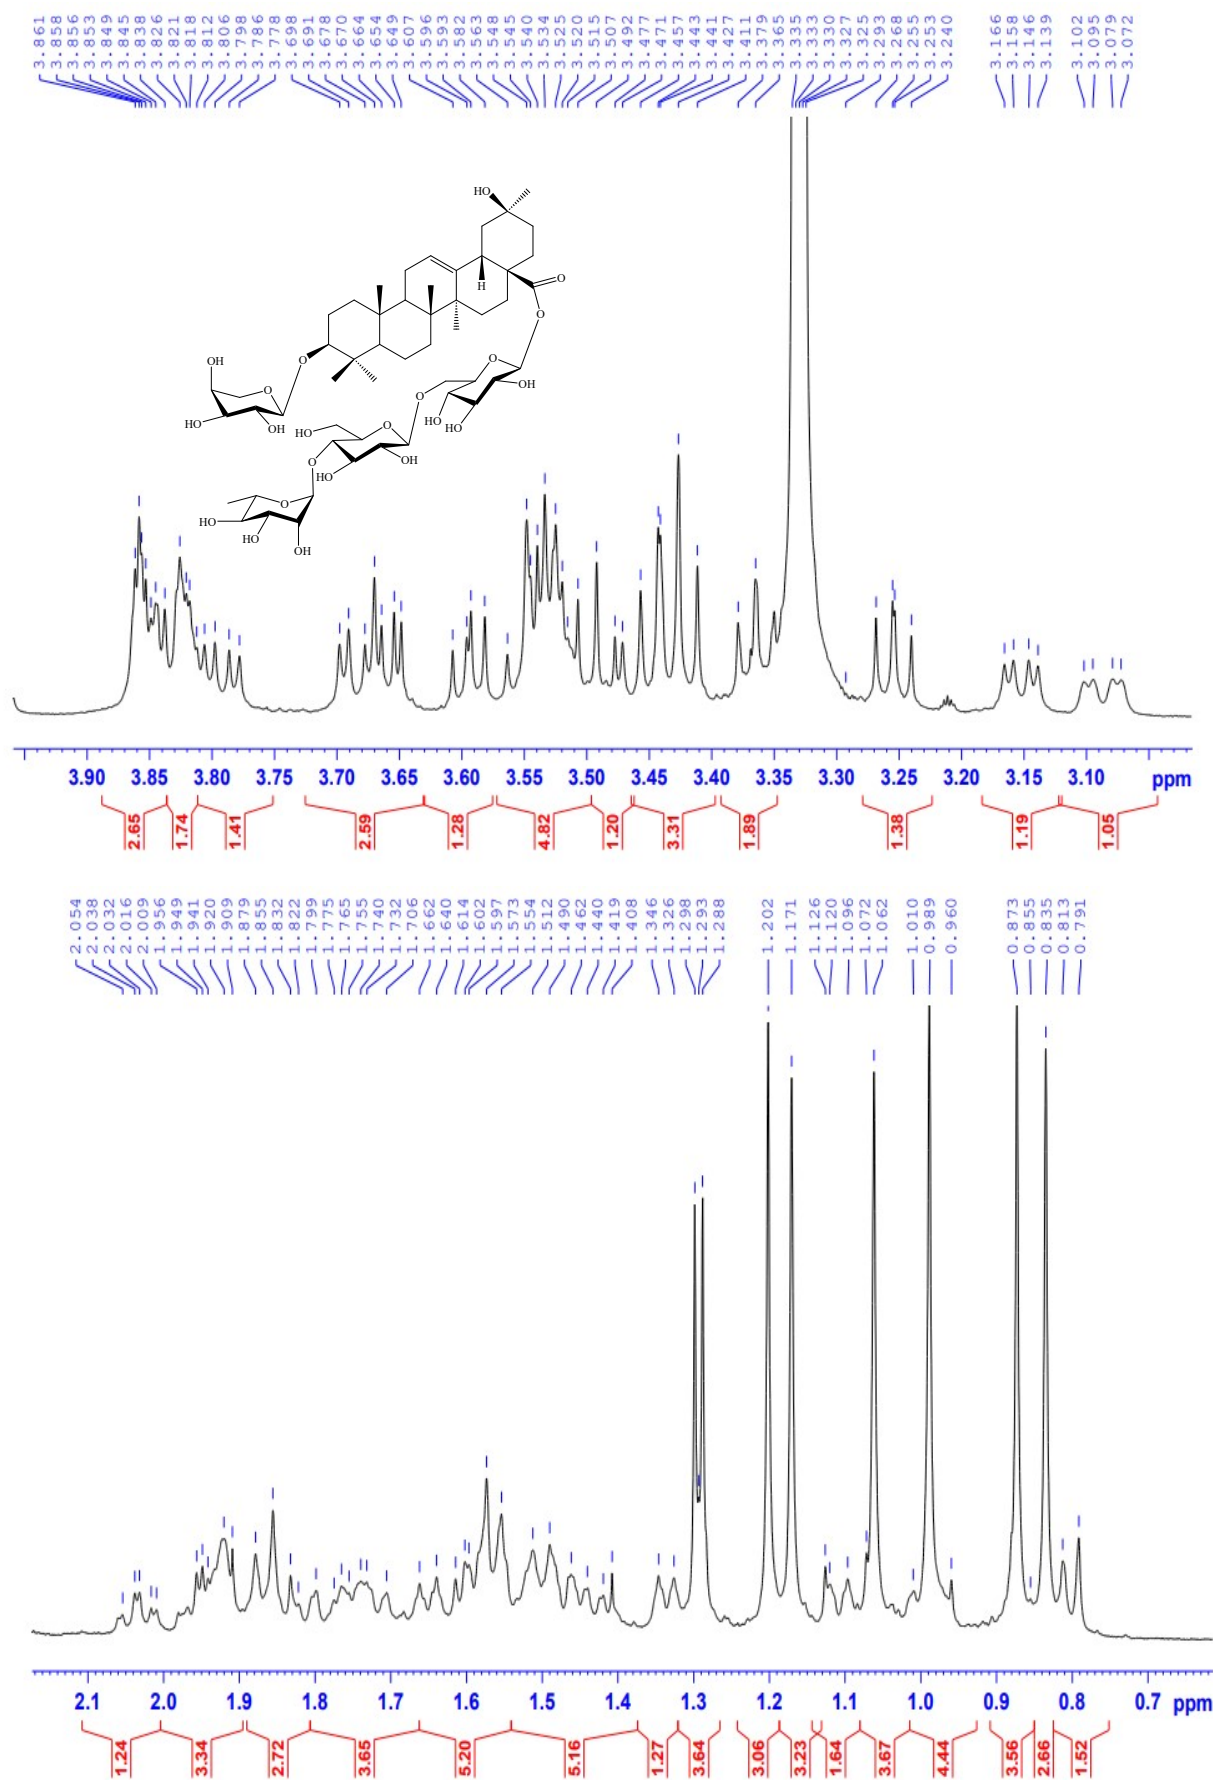

Figure S56. Extended  $^1\text{H}$  NMR spectrum of compound **6** in  $\text{CD}_3\text{OD}$

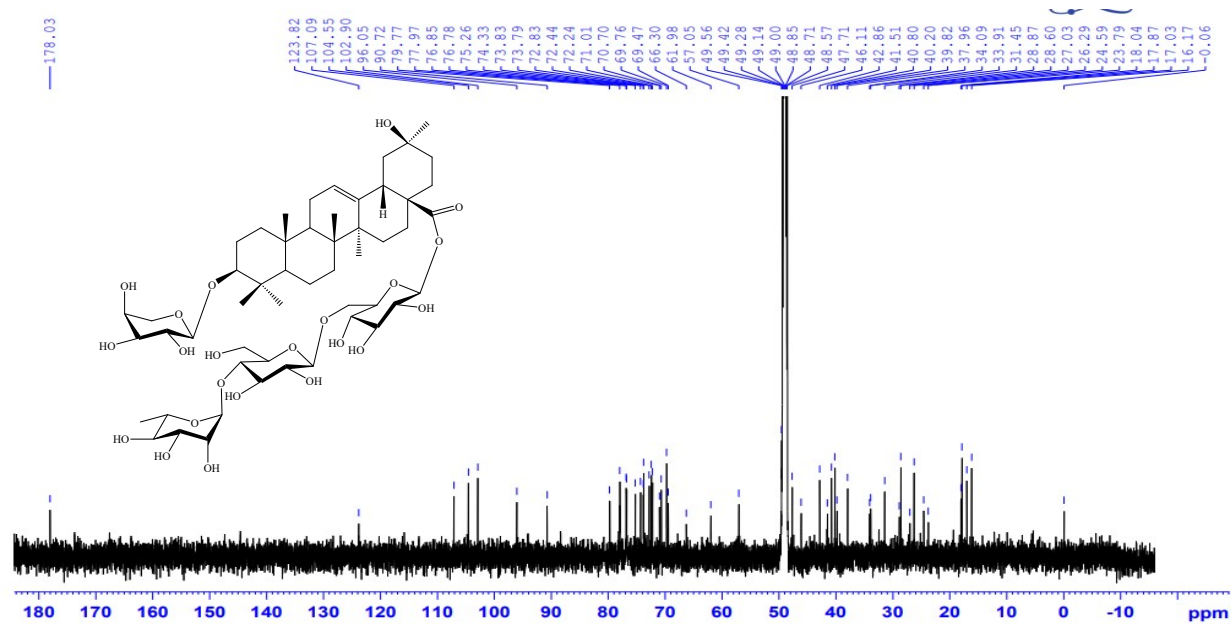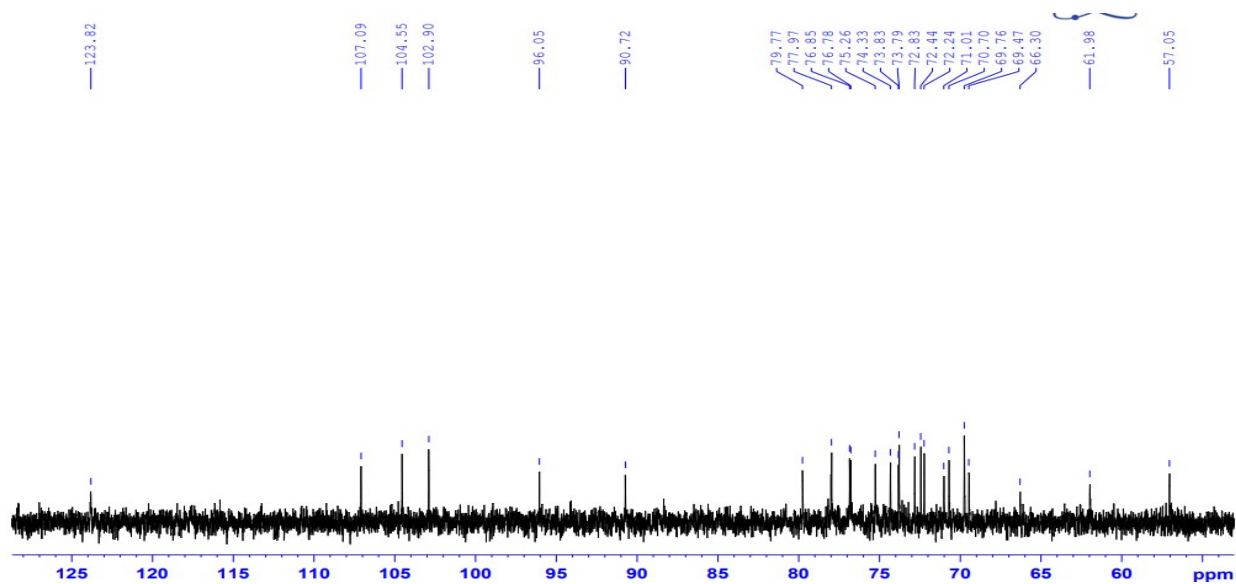

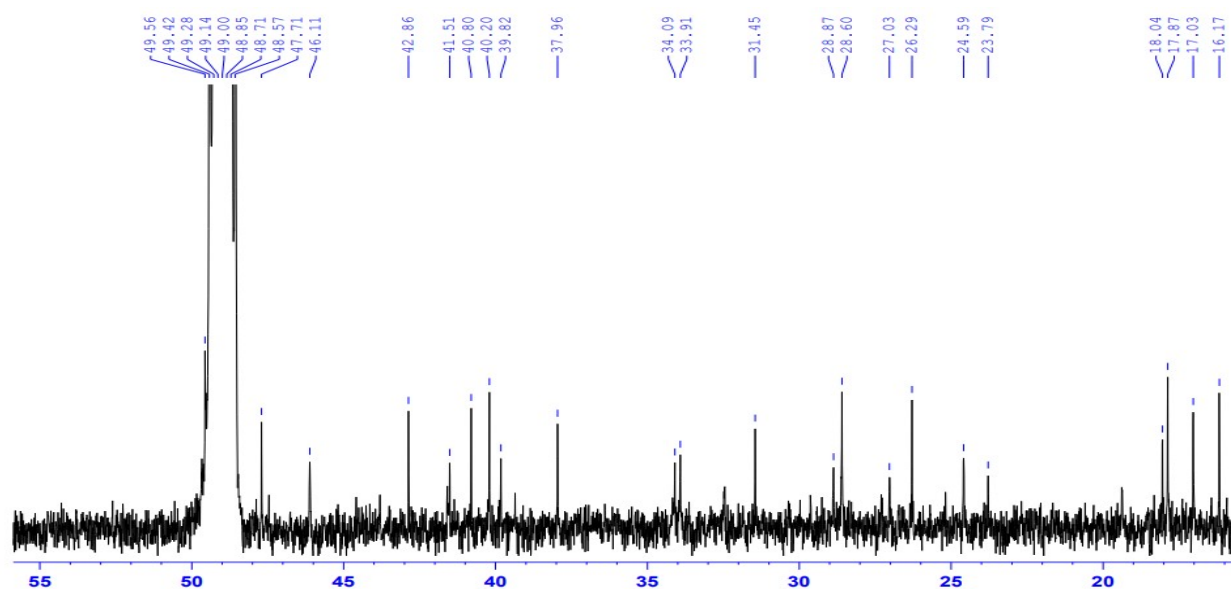

Figure S57.  $^{13}\text{C}$  NMR spectrum of compound **6** in  $\text{CD}_3\text{OD}$

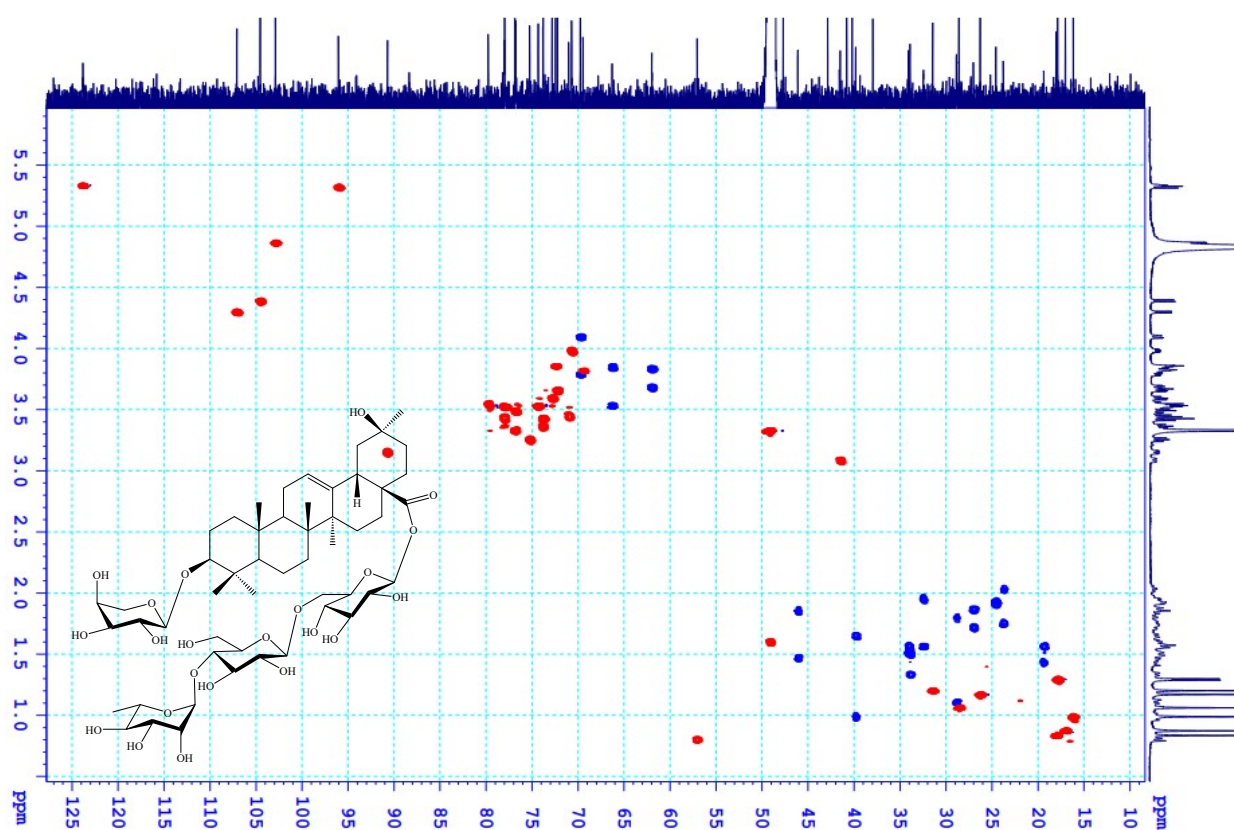

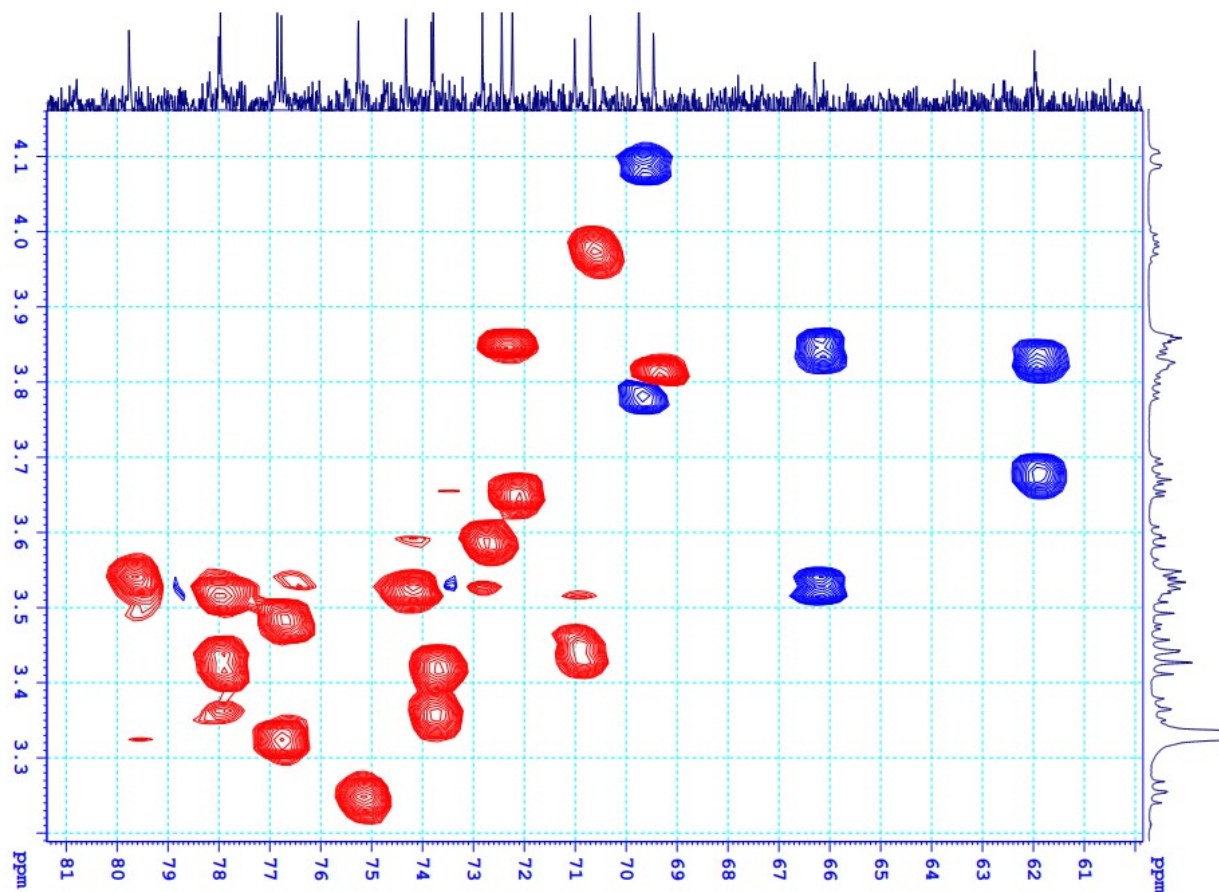

Figure S58. HSQC spectrum of compound **6** in  $\text{CD}_3\text{OD}$

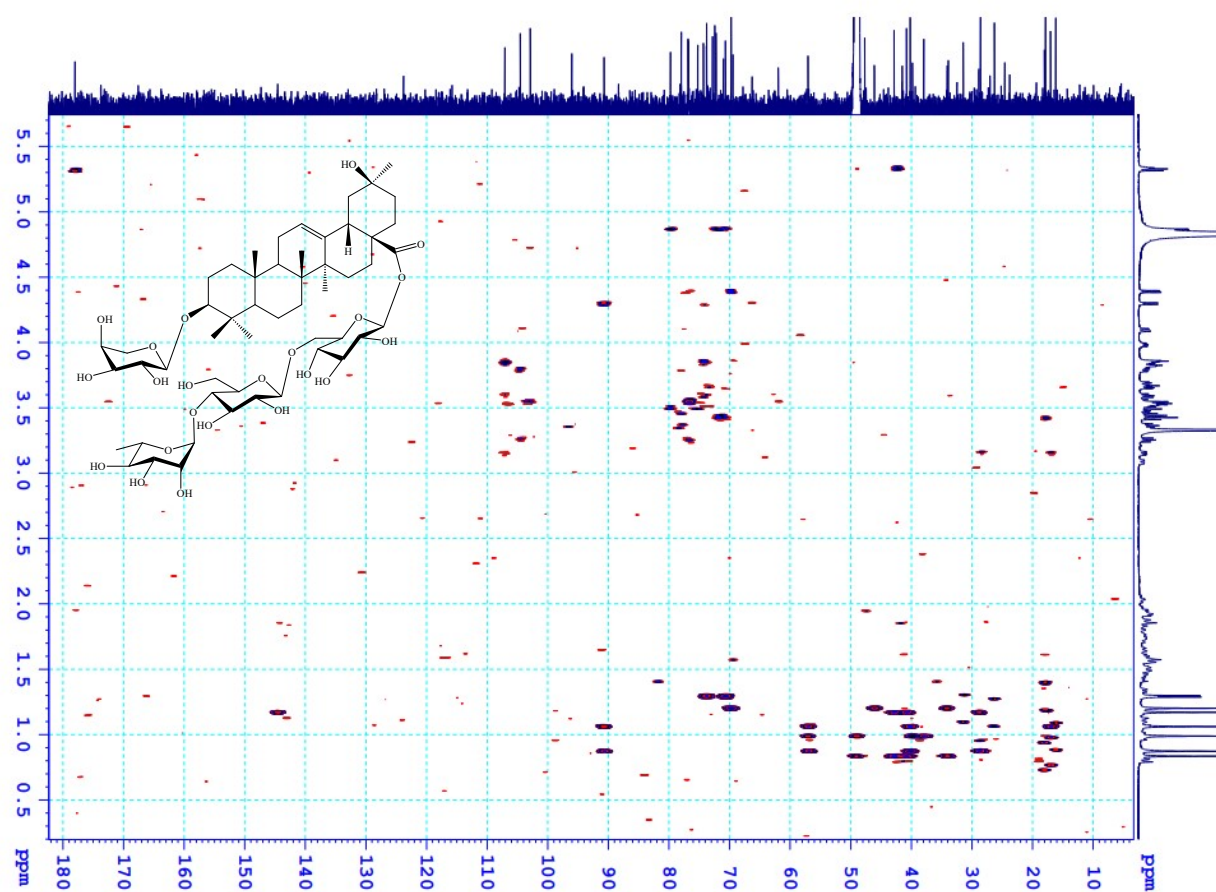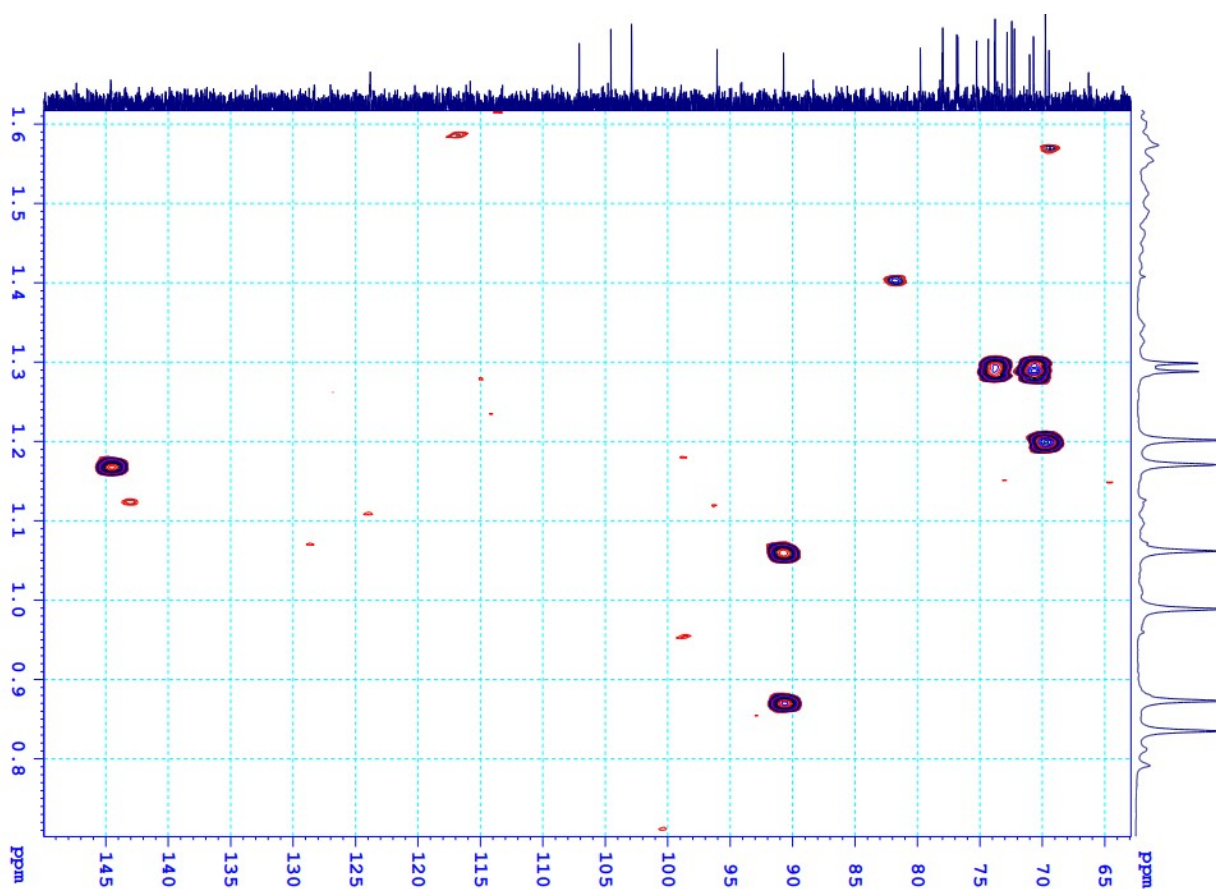

Figure S59. HMBC spectrum of compound **6** in CD<sub>3</sub>OD

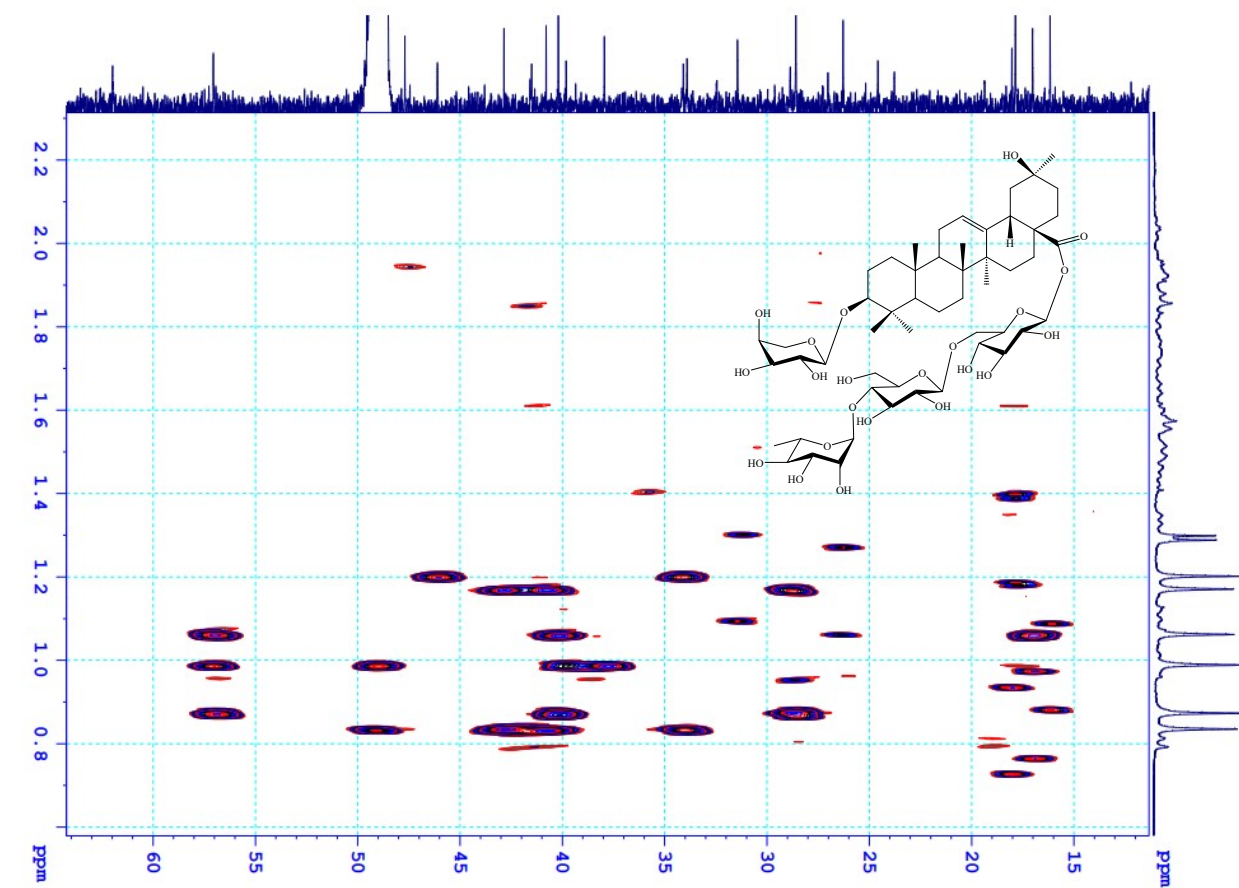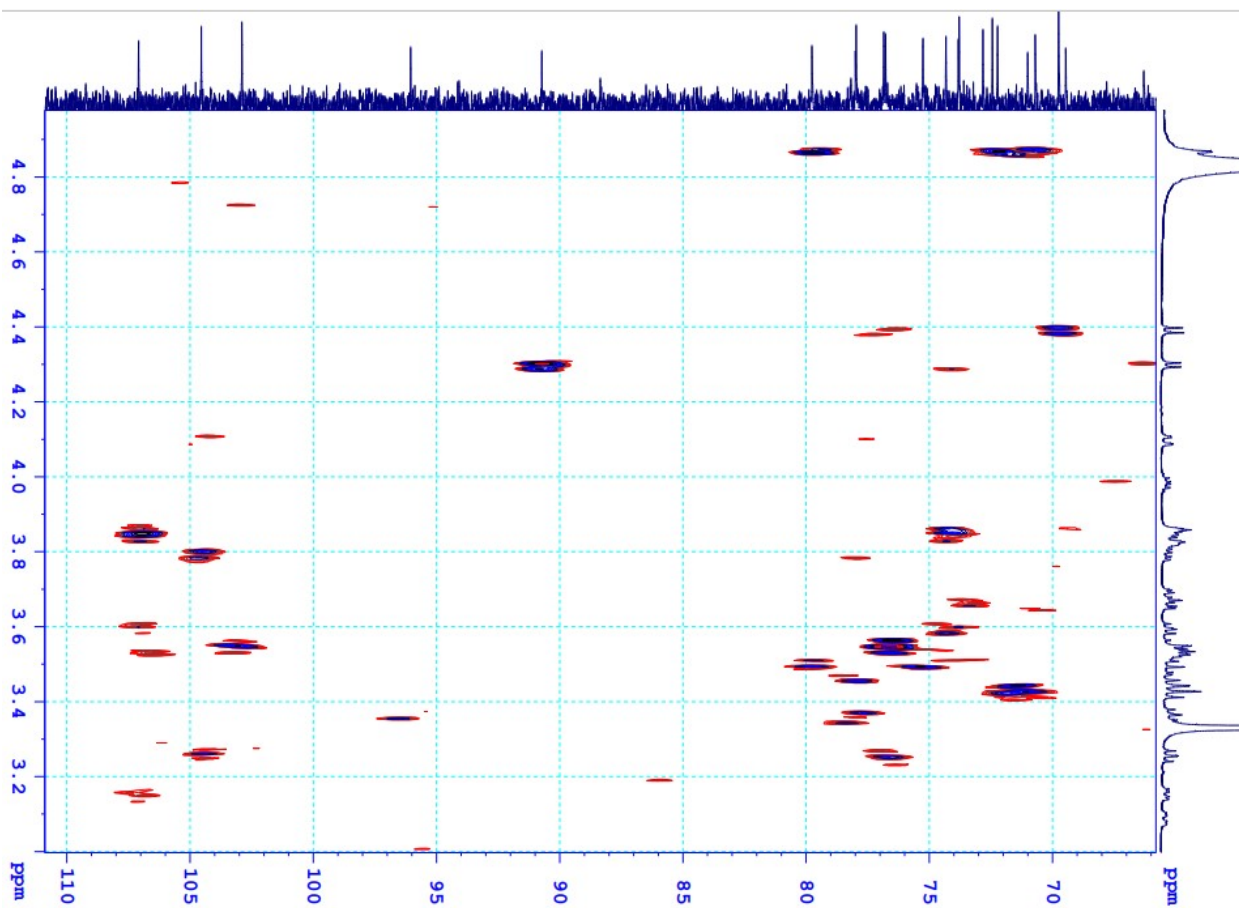

Figure S60. Extended HMBC spectrum of compound **6** in CD<sub>3</sub>OD

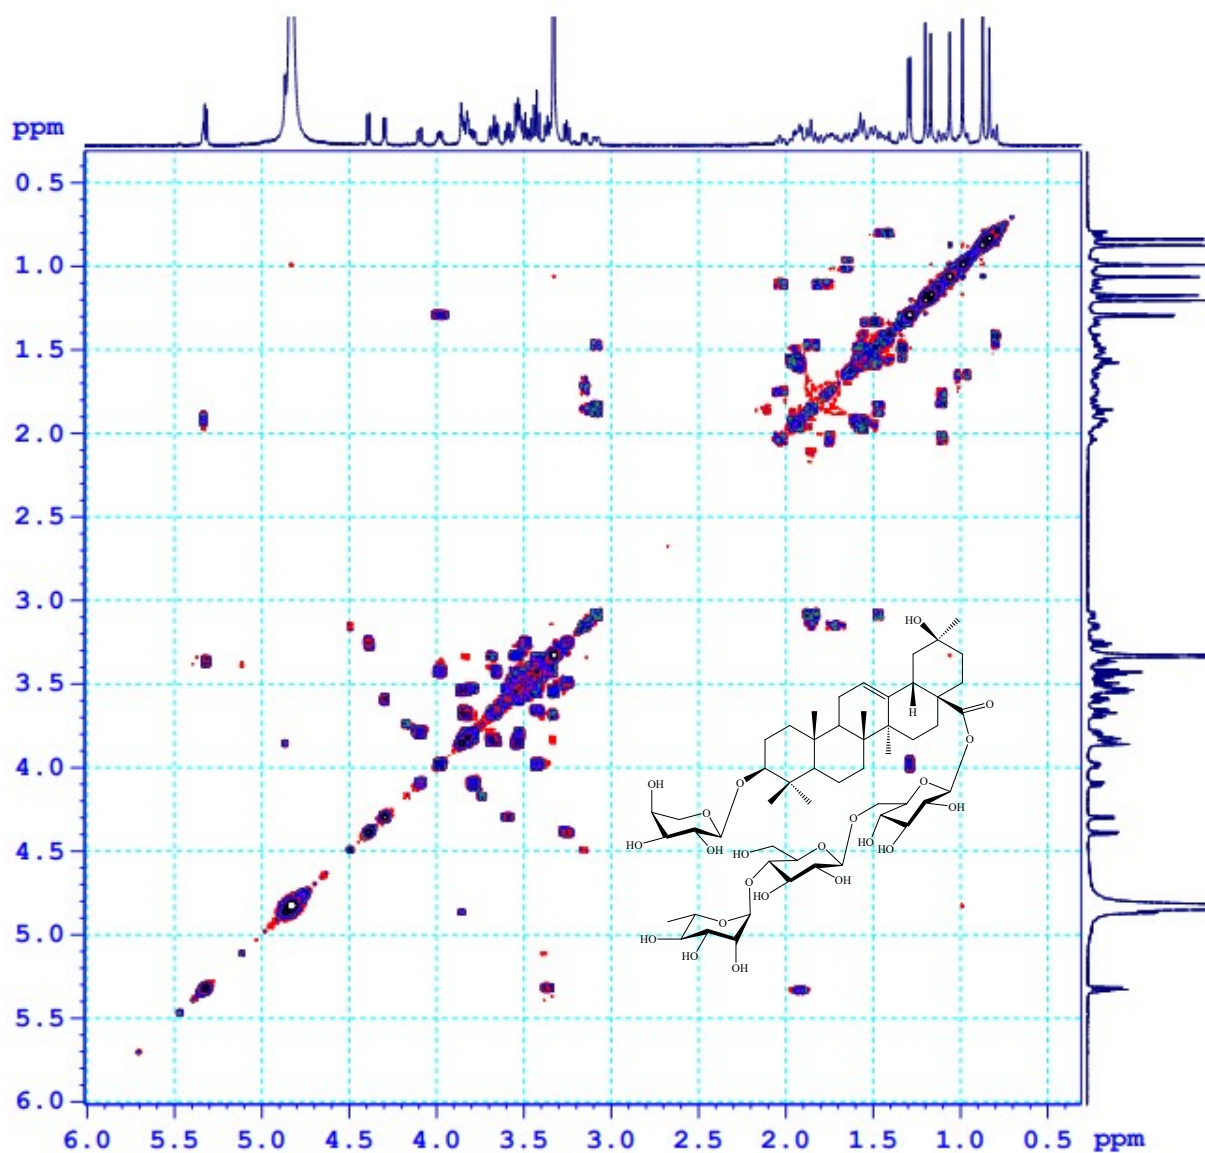

Figure S61. COSY spectrum of compound **6** in CD<sub>3</sub>OD

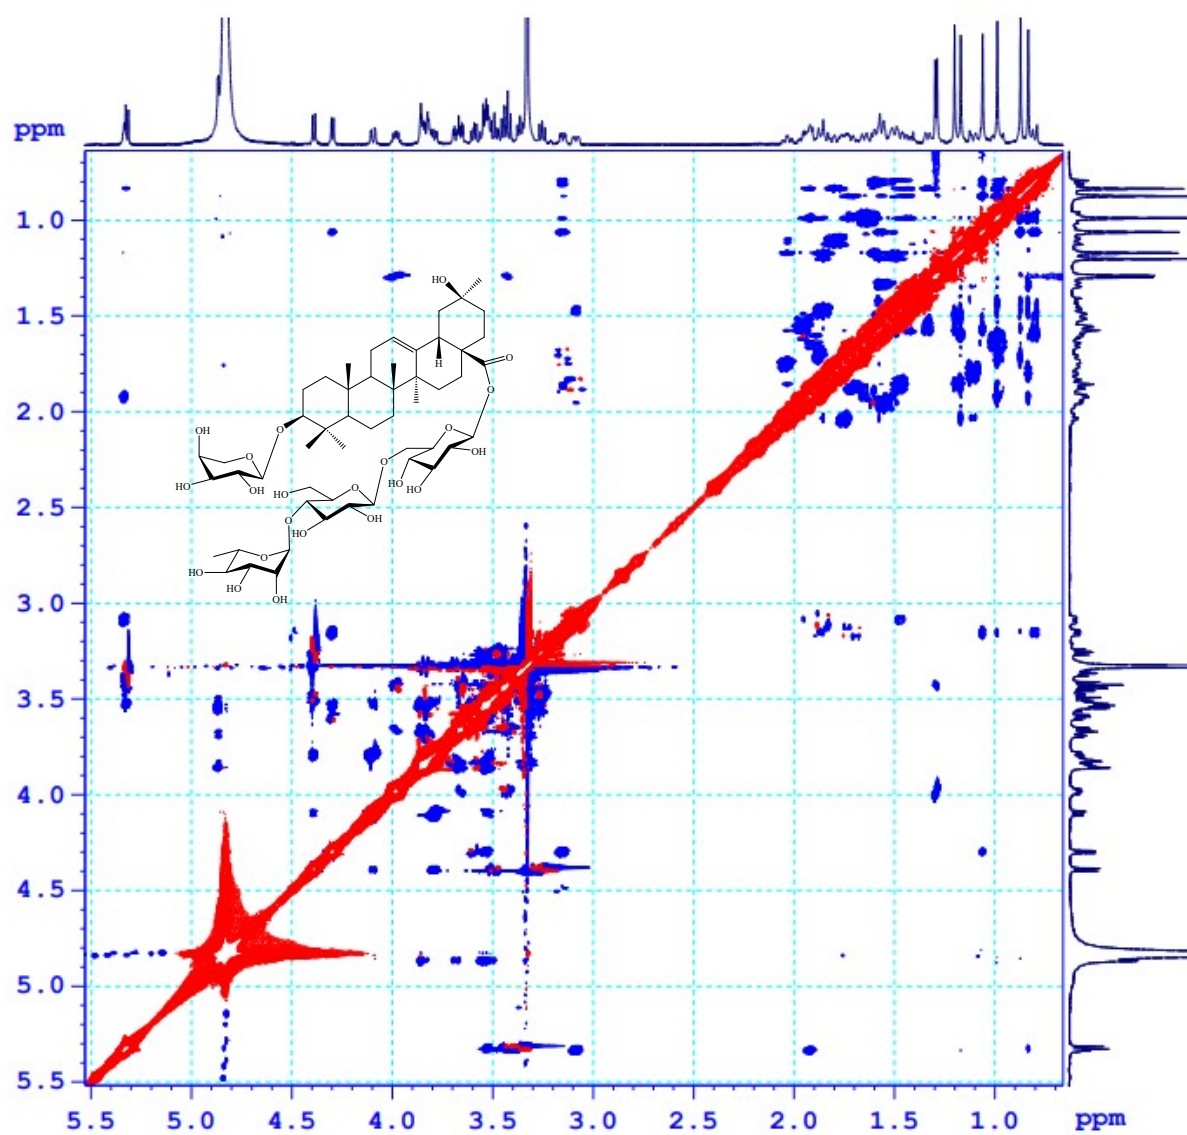

Figure S62. NOESY spectrum of compound **6** in CD<sub>3</sub>OD

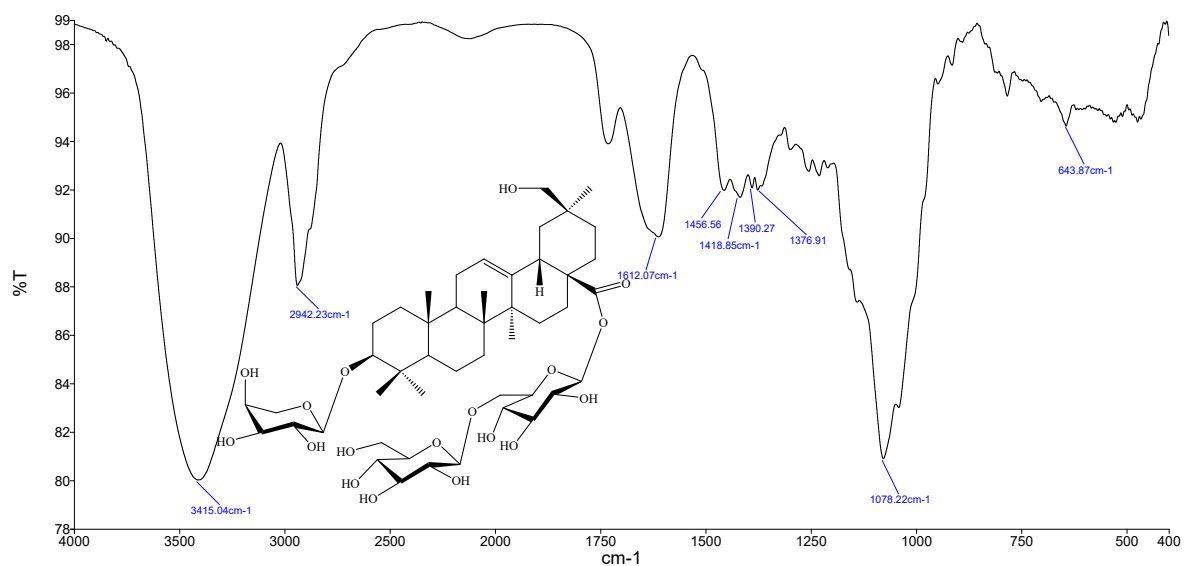

Figure S63. IR spectrum of compound 7

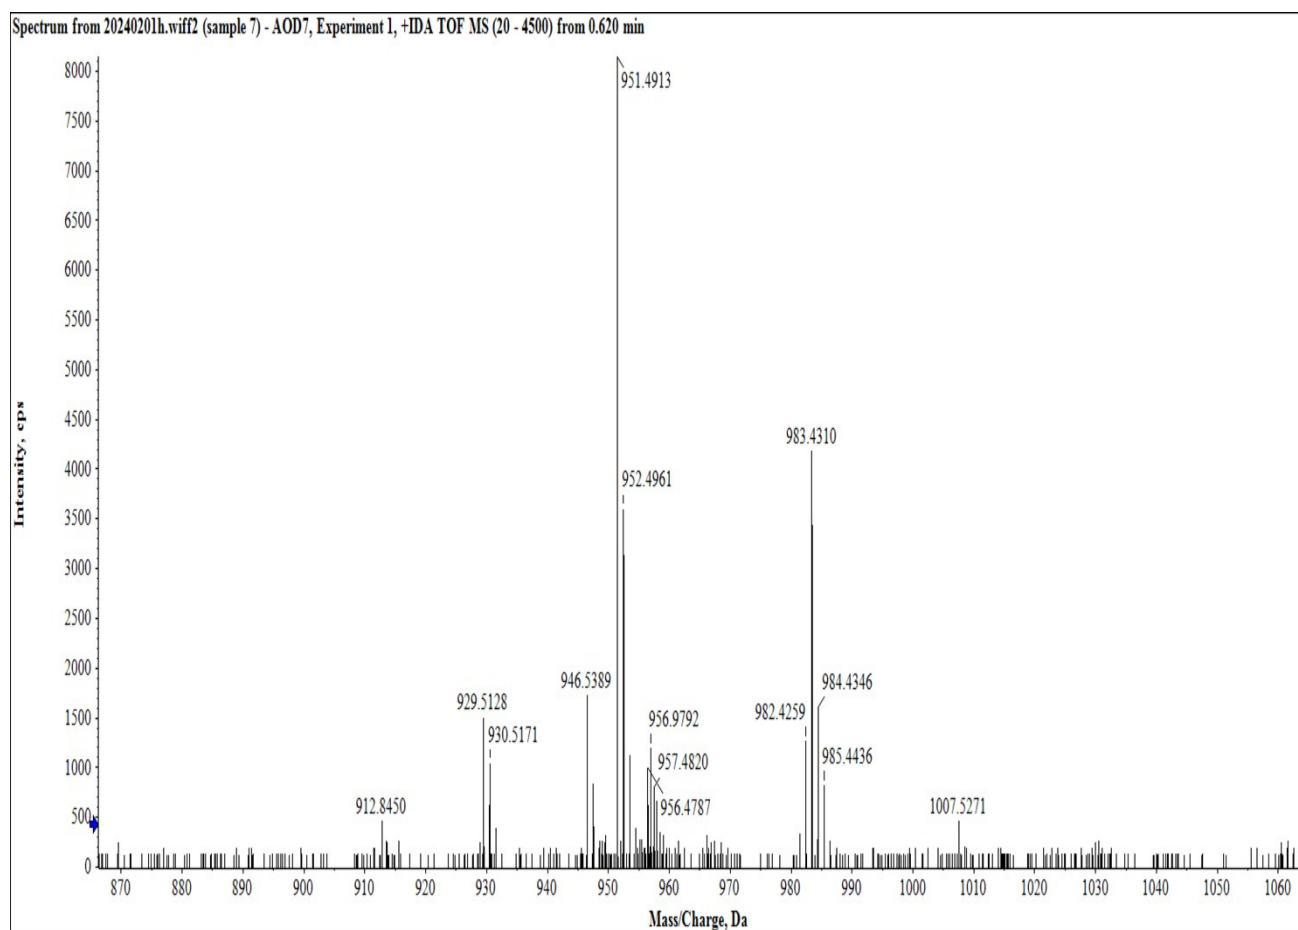

HR-ESI-MS  $m/z$  929.5128  $[M+H]^+$ , (calcd. for  $[C_{47}H_{77}O_{18}]^+$ , 929.5105,  $\Delta=+2.5$  ppm),  $m/z$  951.4913  $[M+Na]^+$ , (calcd. for  $[C_{47}H_{76}O_{18}Na]^+$ , 951.4924,  $\Delta=-1.7$  ppm)

Figure S64. HR-ESI-MS spectrum of compound 7

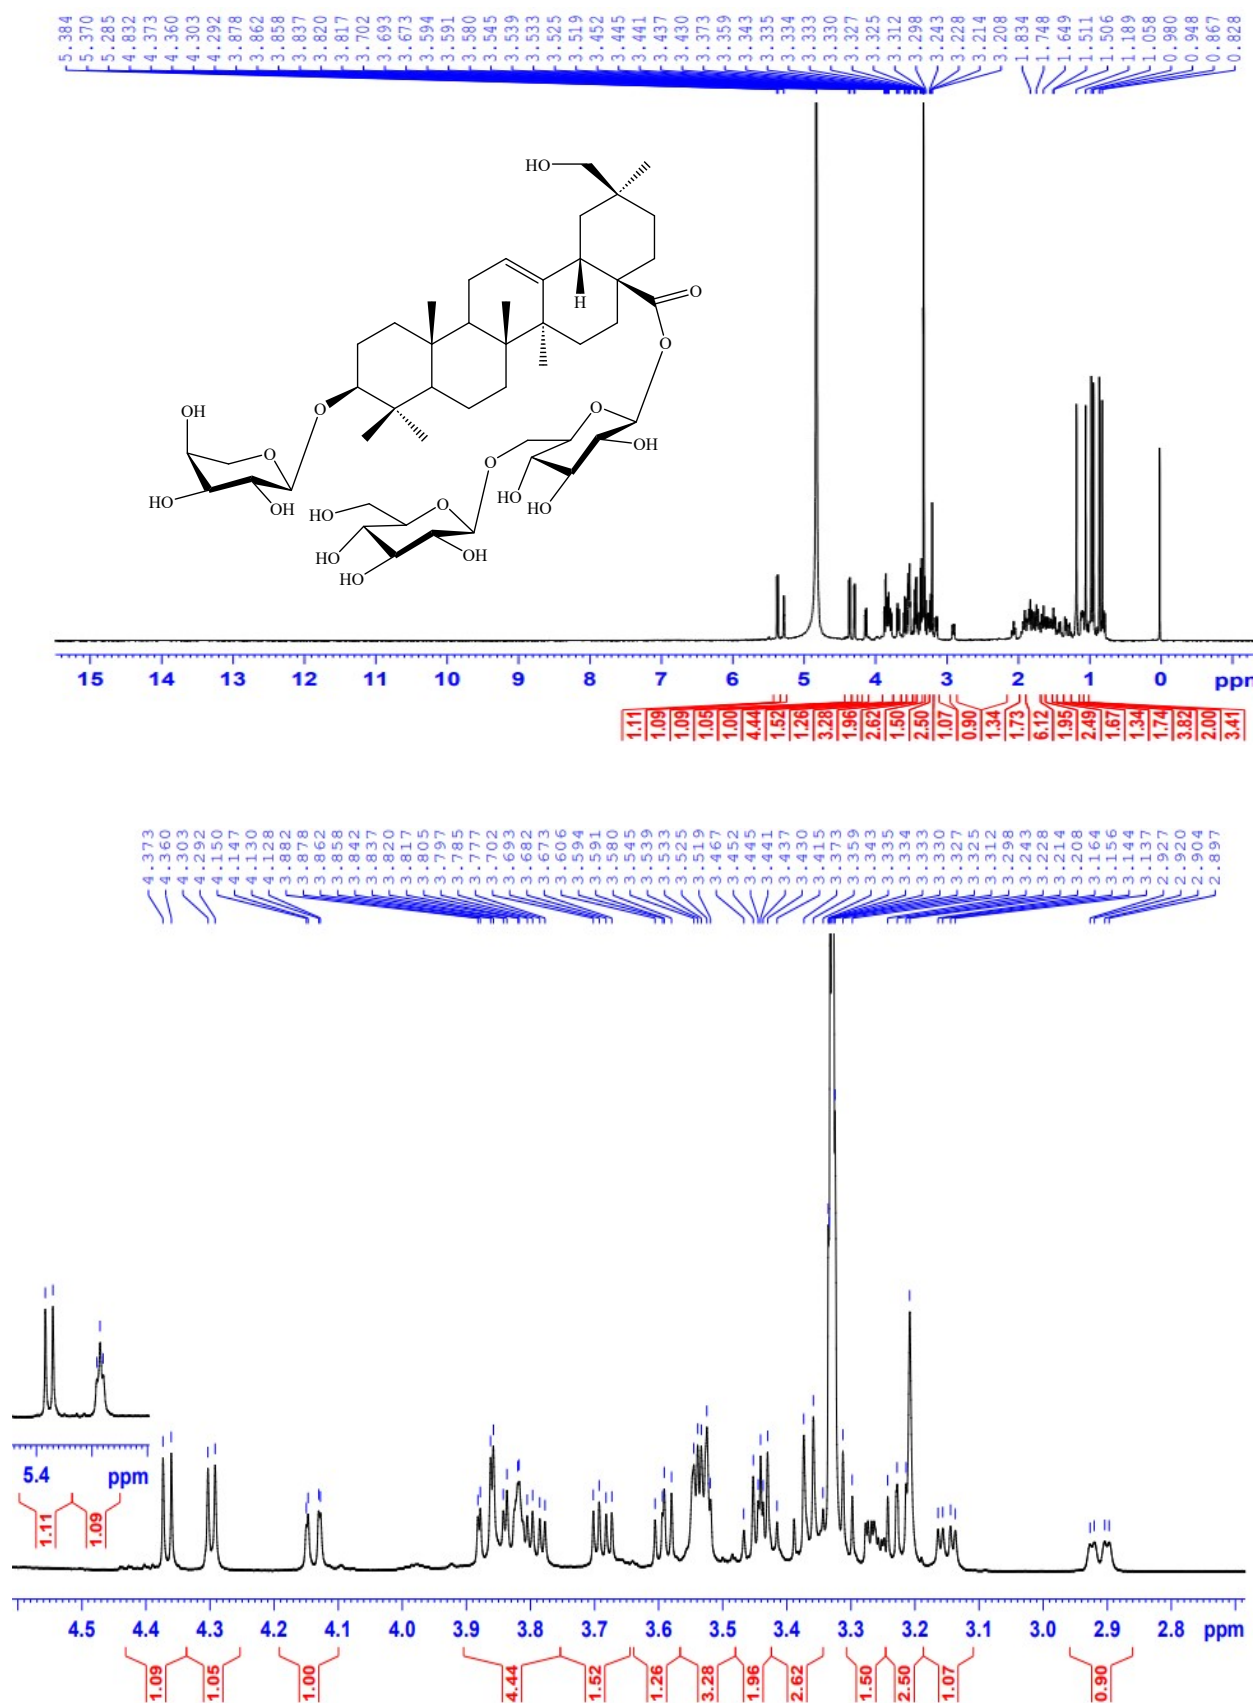

Figure S65.  $^1\text{H}$  NMR spectrum of compound 7 in  $\text{CD}_3\text{OD}$

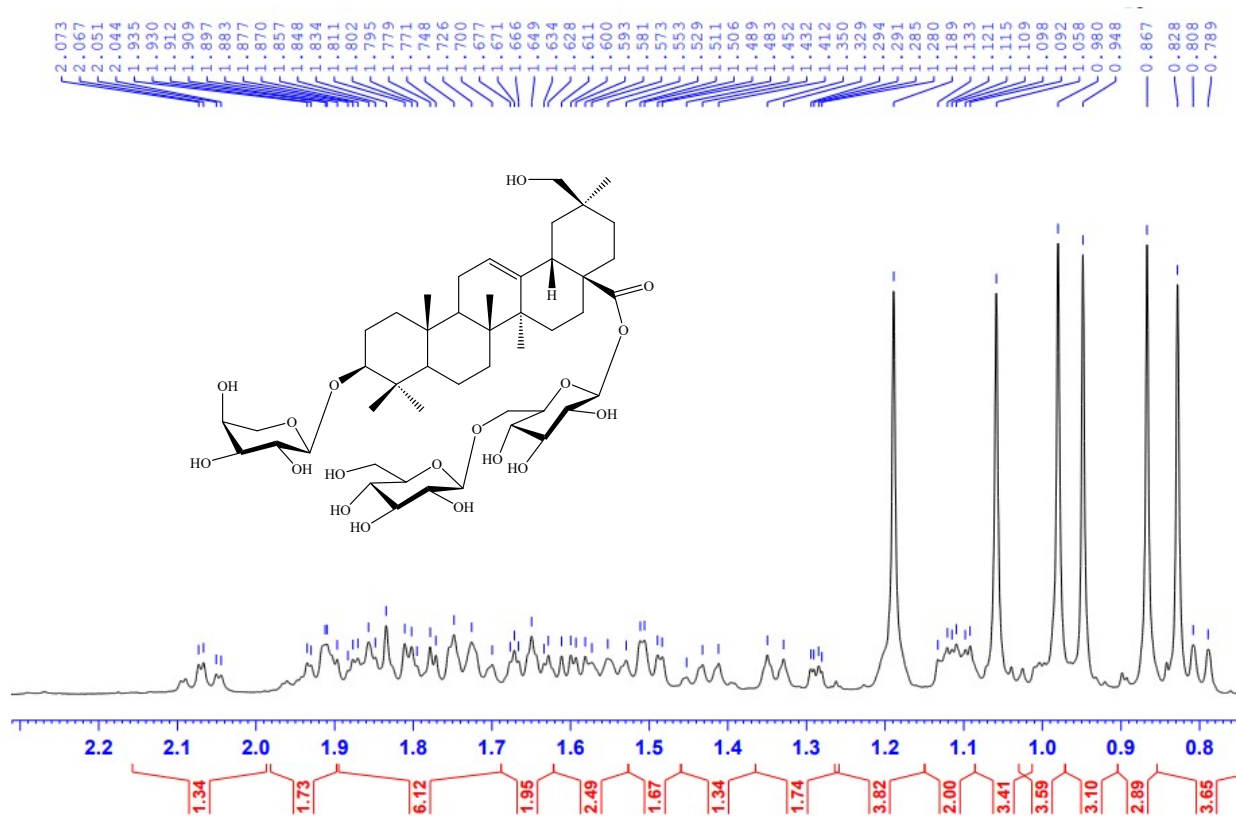

Figure S66. Extended  $^1\text{H}$  NMR spectrum of compound **7** in  $\text{CD}_3\text{OD}$

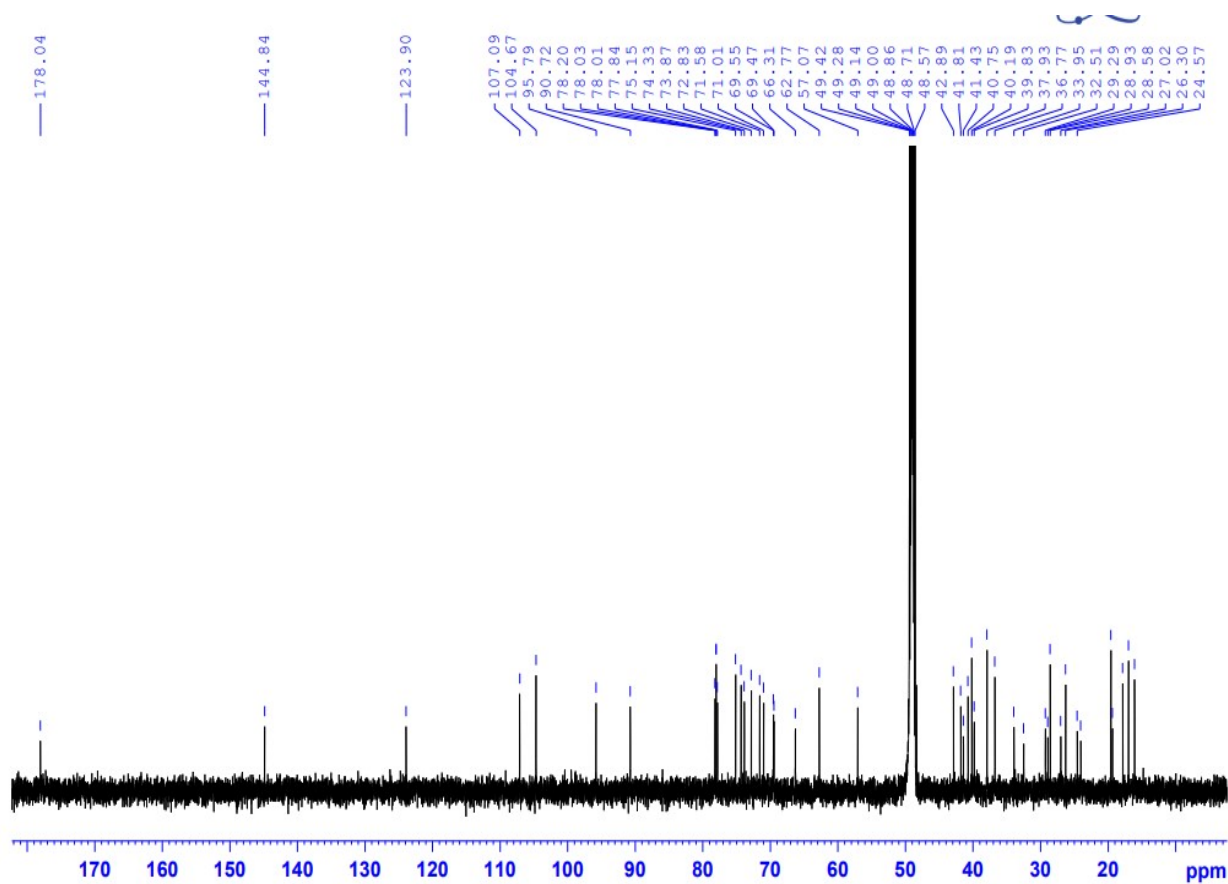

Figure S67.  $^{13}\text{C}$  NMR spectrum of compound **7** in  $\text{CD}_3\text{OD}$

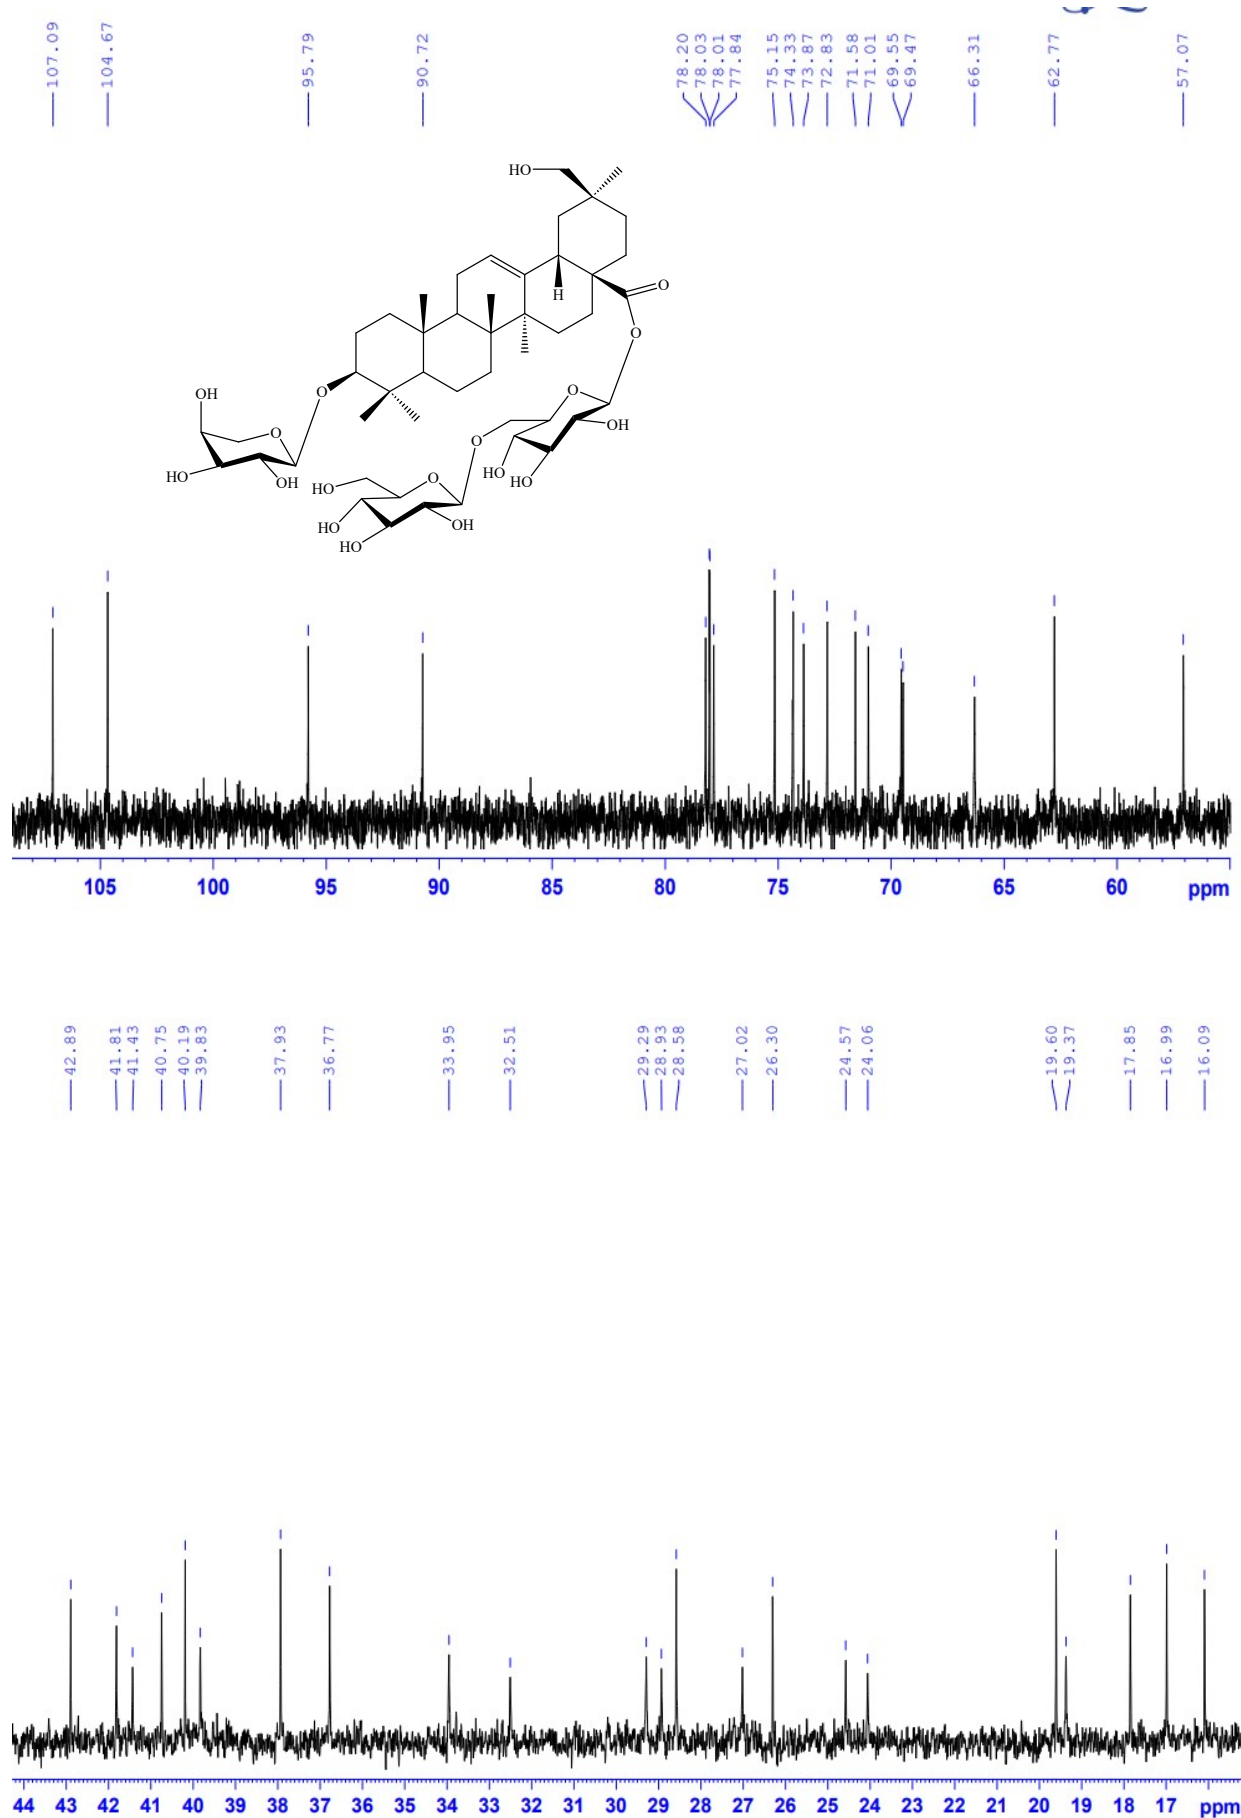

Figure S68. Extended  $^{13}\text{C}$  NMR spectrum of compound 7 in  $\text{CD}_3\text{OD}$

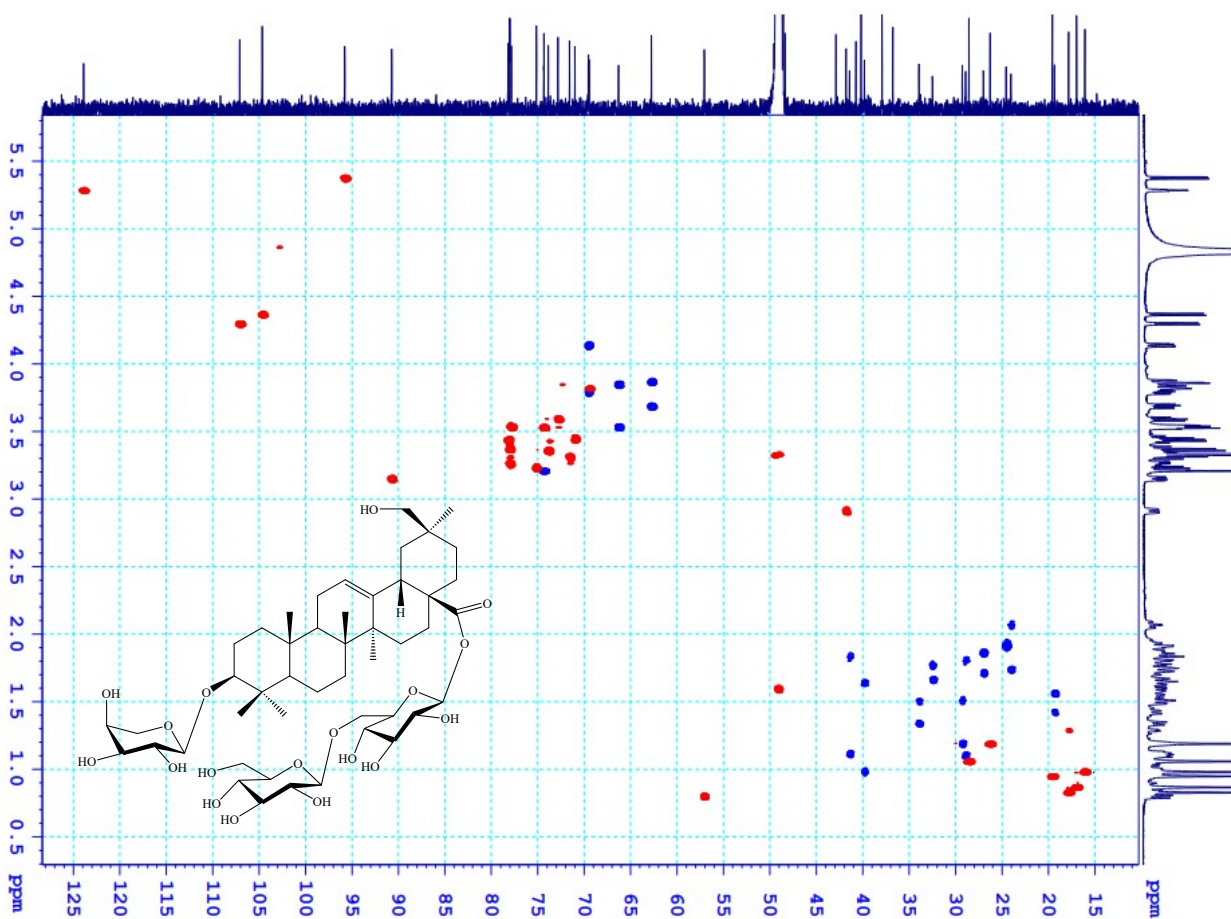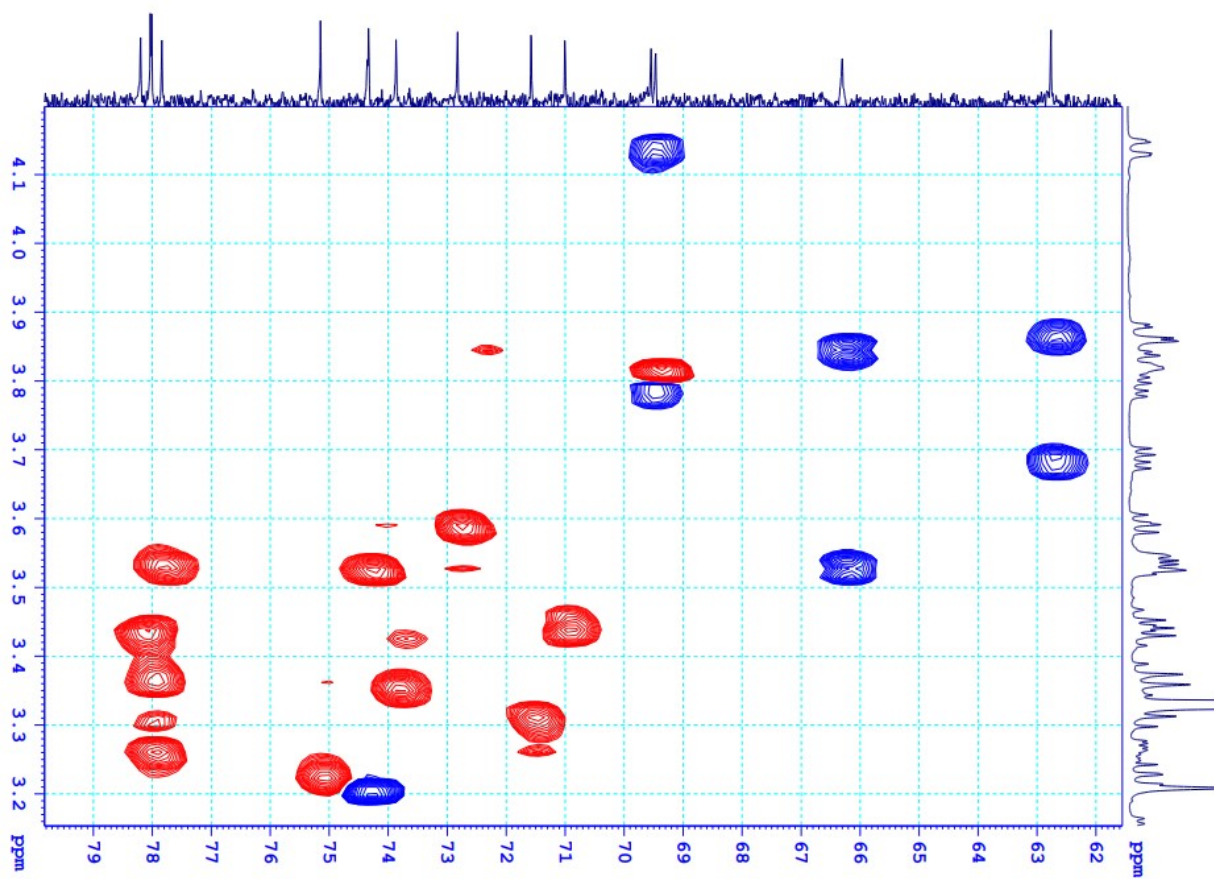

Figure S69. HSQC spectrum of compound **7** in CD<sub>3</sub>OD

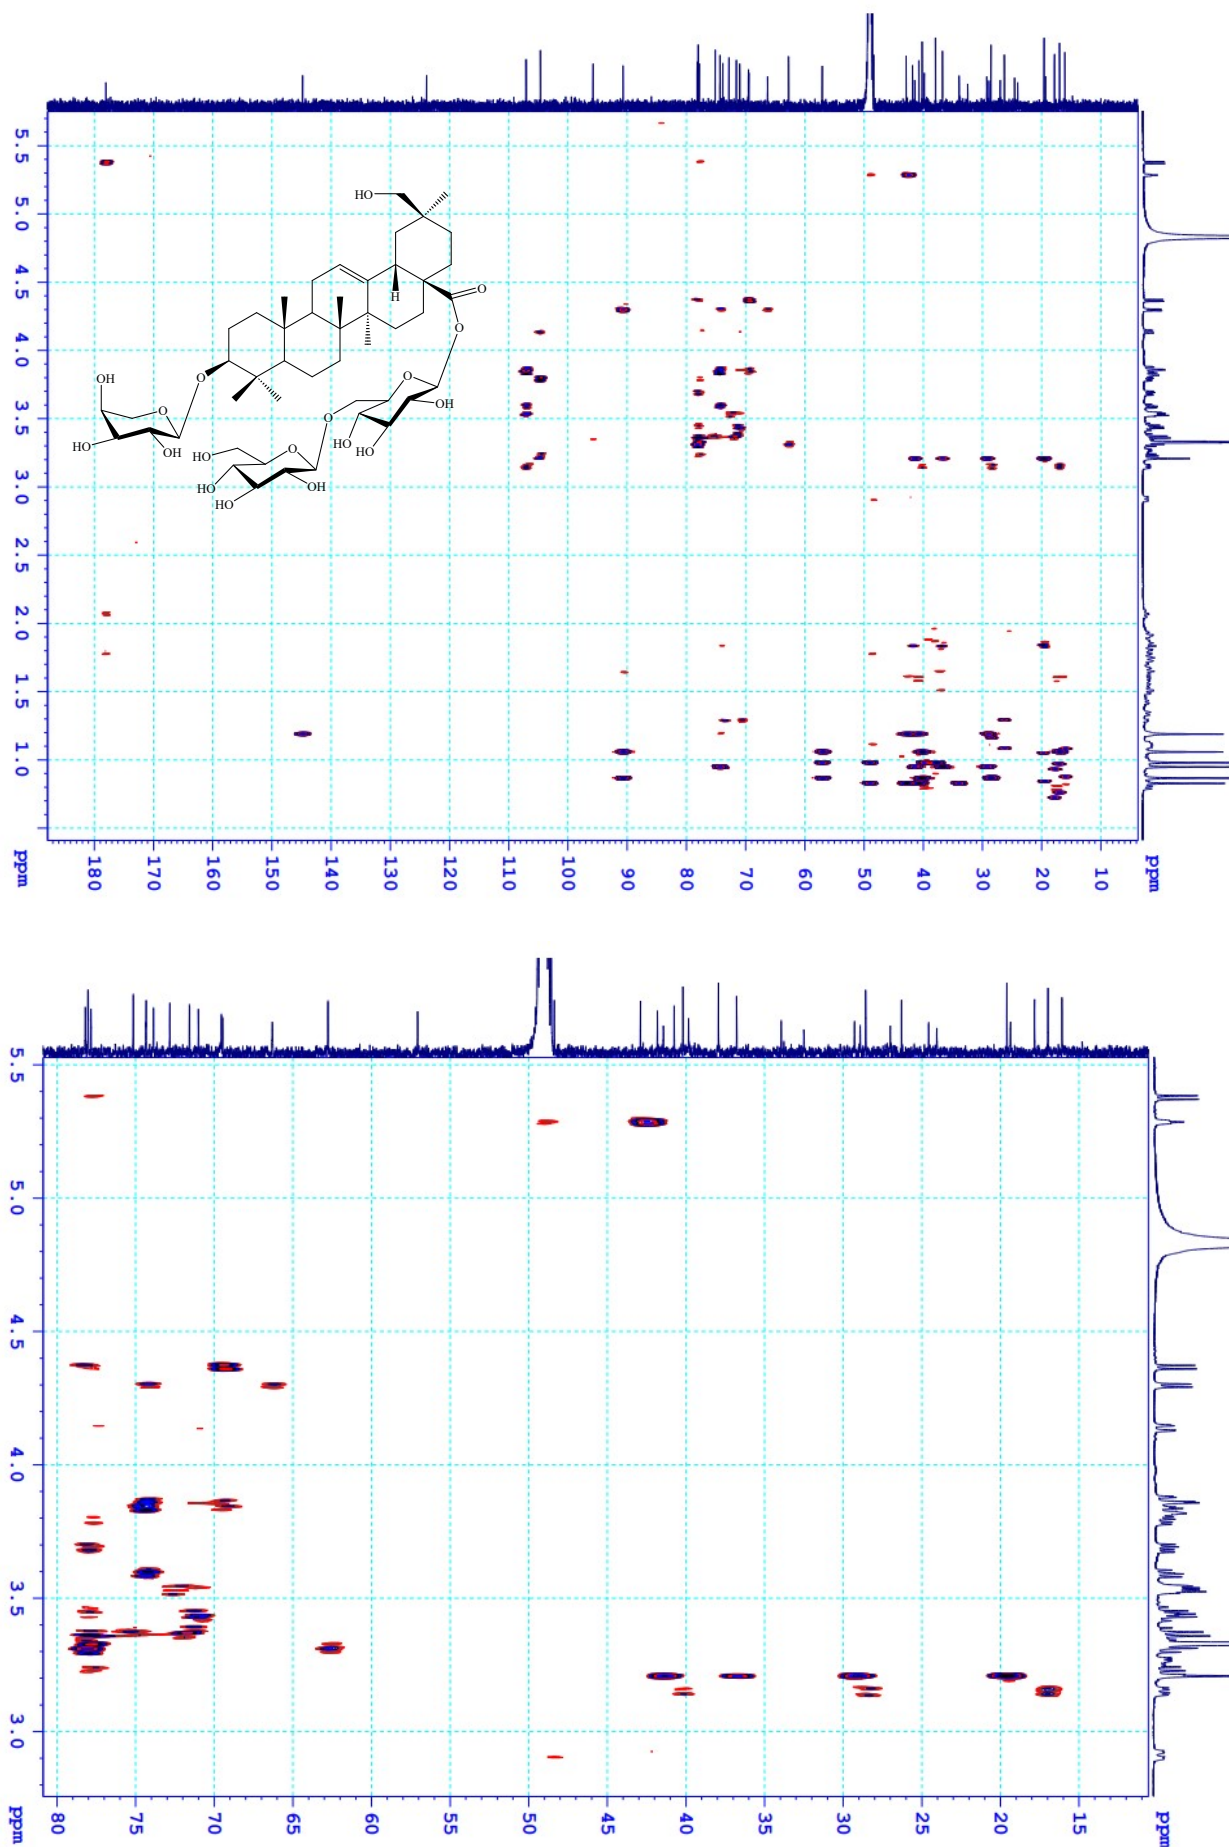

Figure S70. HMBC spectrum of compound **7** in CD<sub>3</sub>OD

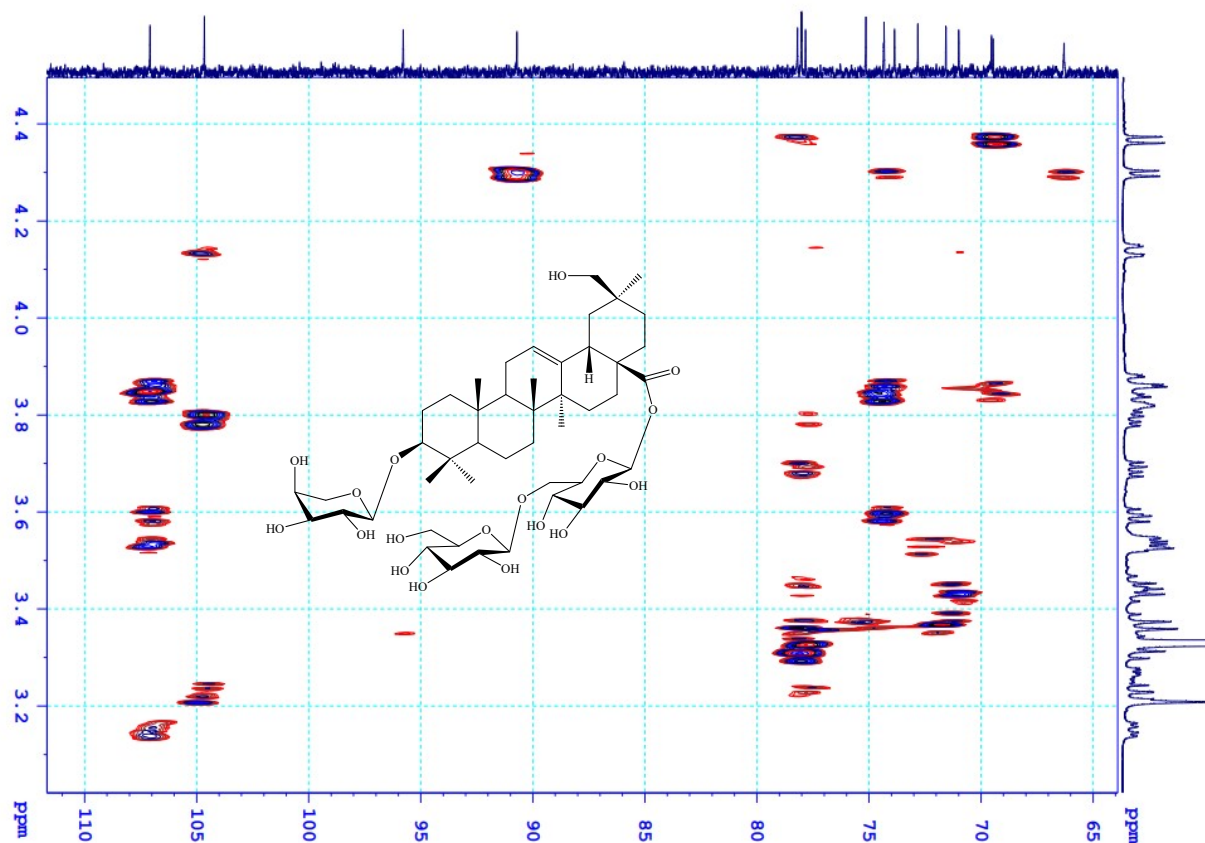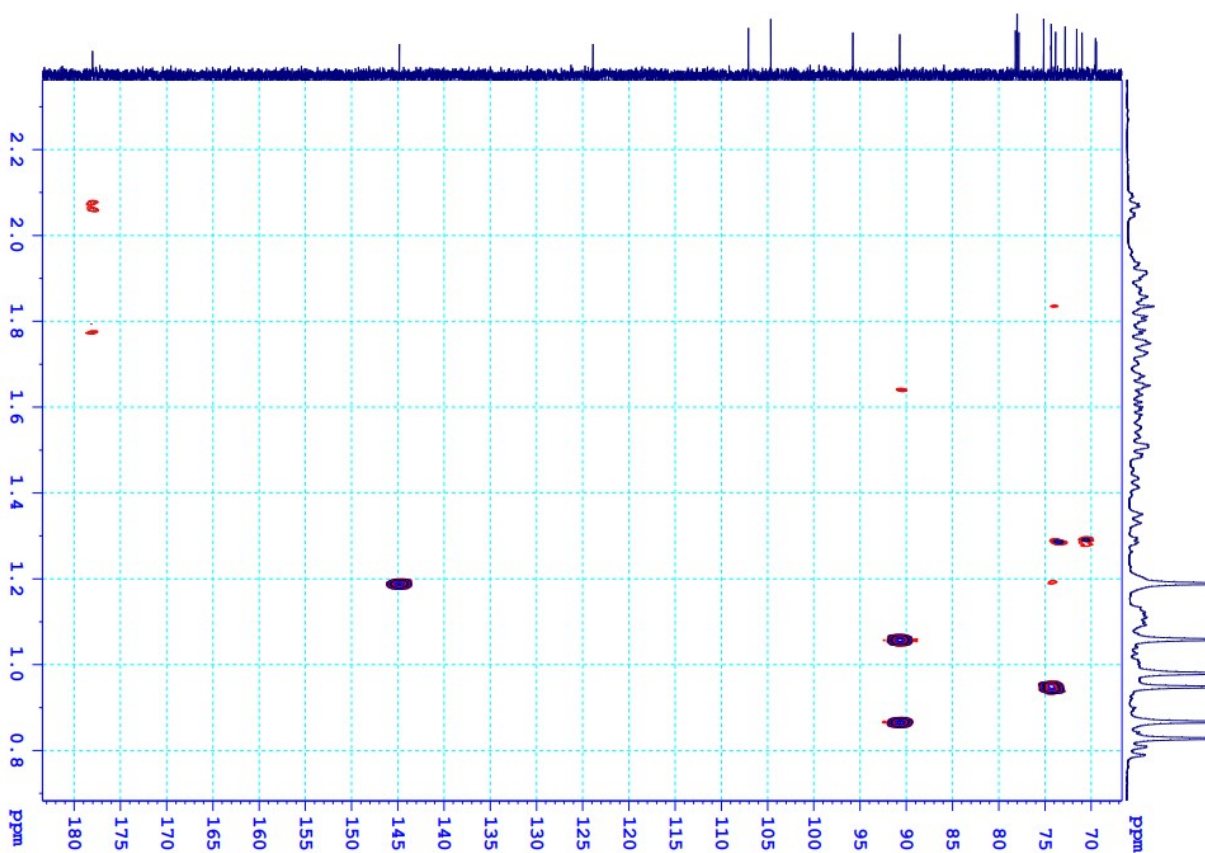

Figure S71. Extended HMBC spectrum of compound **7** in CD<sub>3</sub>OD

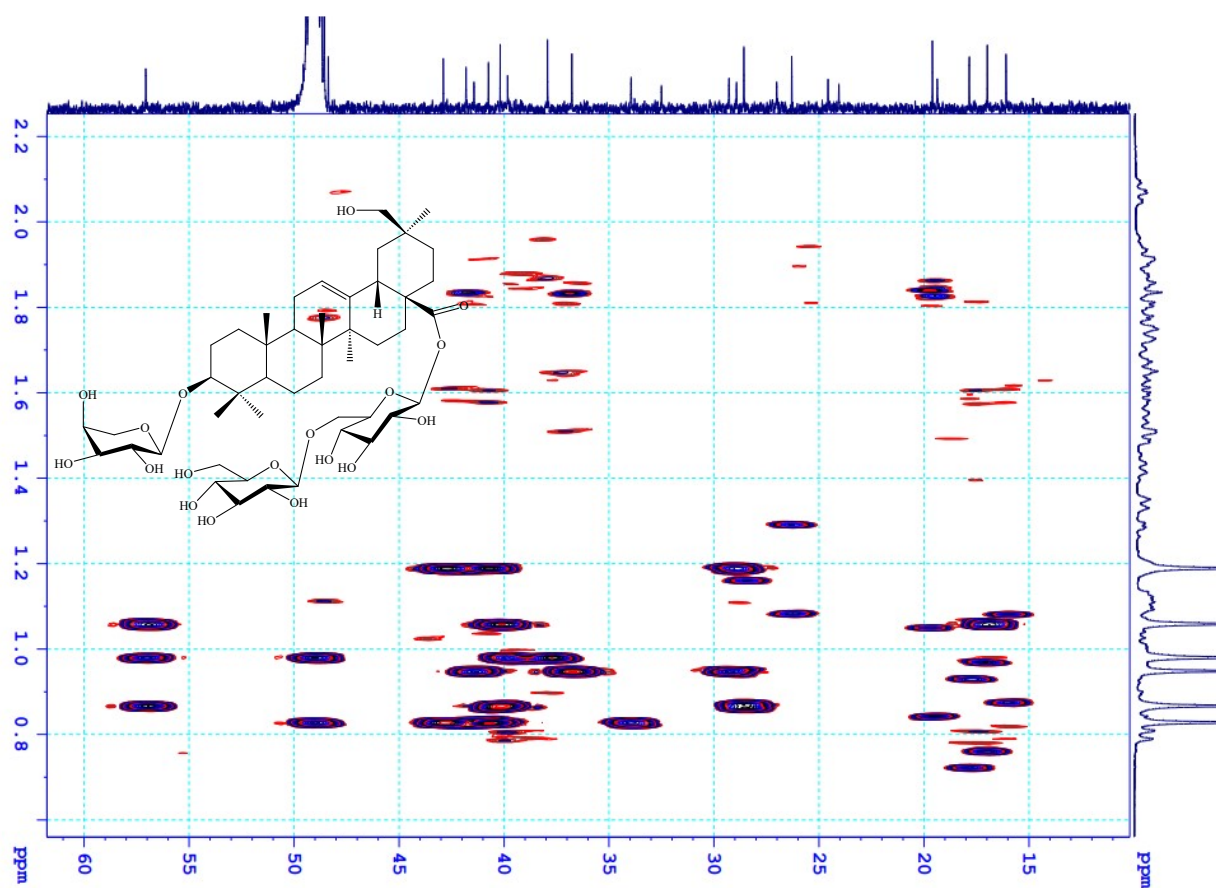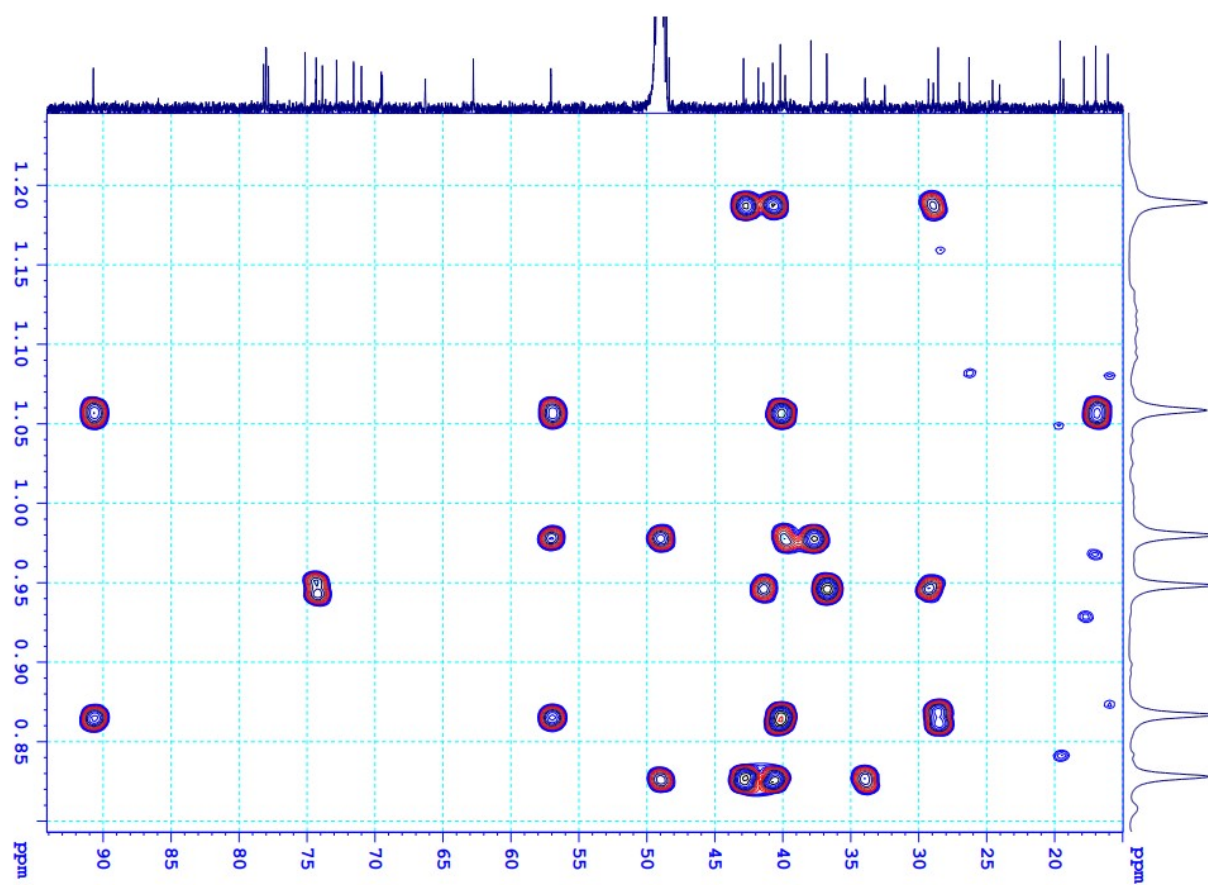

Figure S72. Extended HMBC spectrum of compound 7 in  $\text{CD}_3\text{OD}$

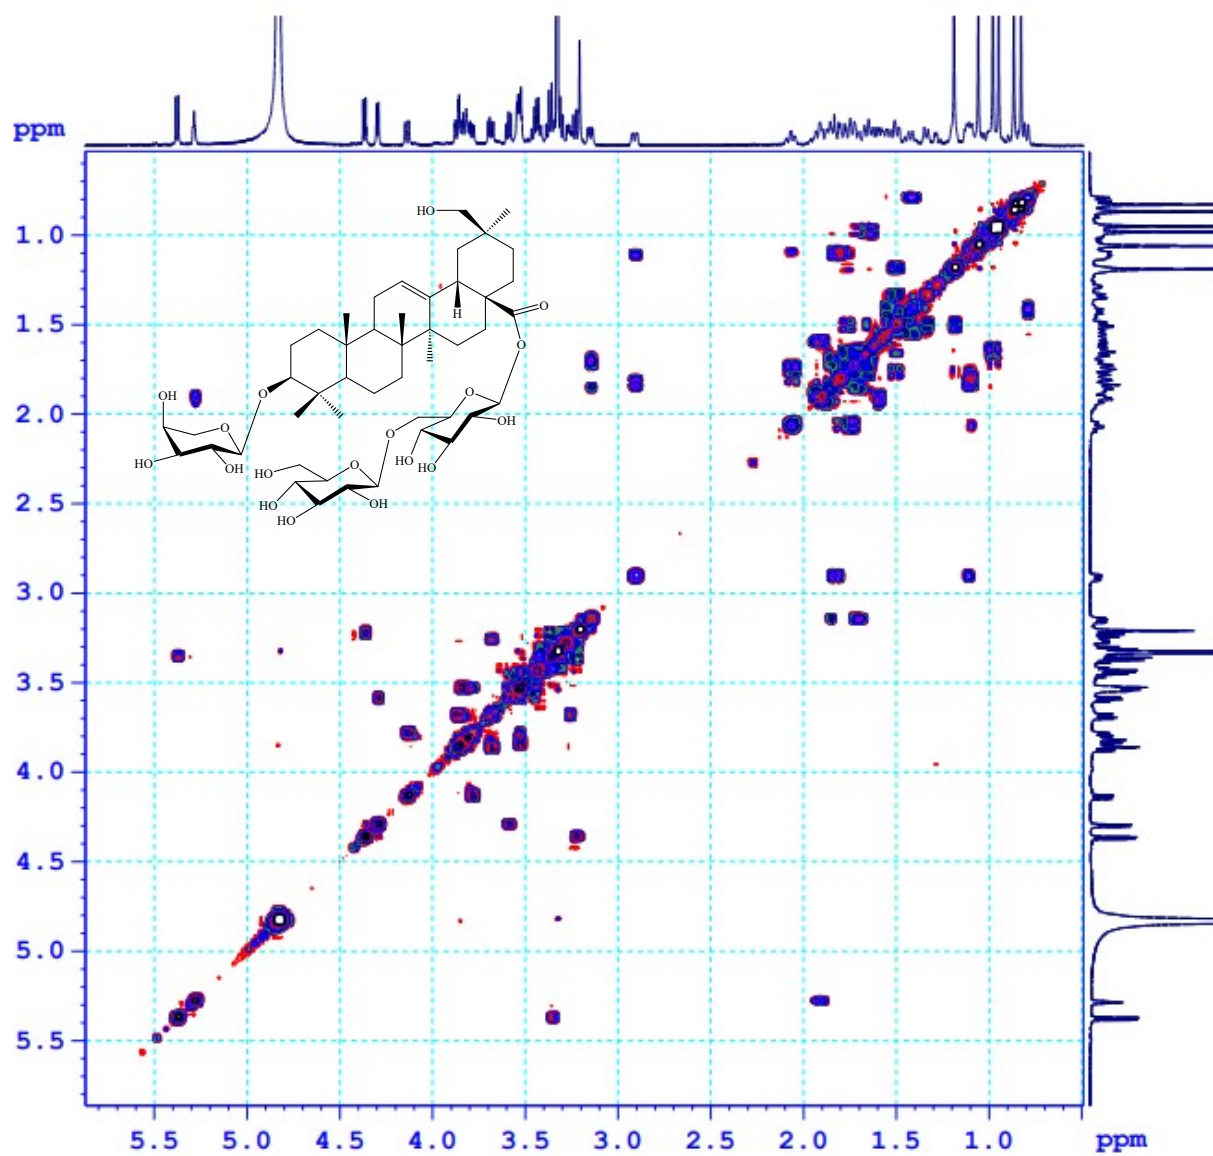

Figure S73. COSY spectrum of compound 7 in CD<sub>3</sub>OD

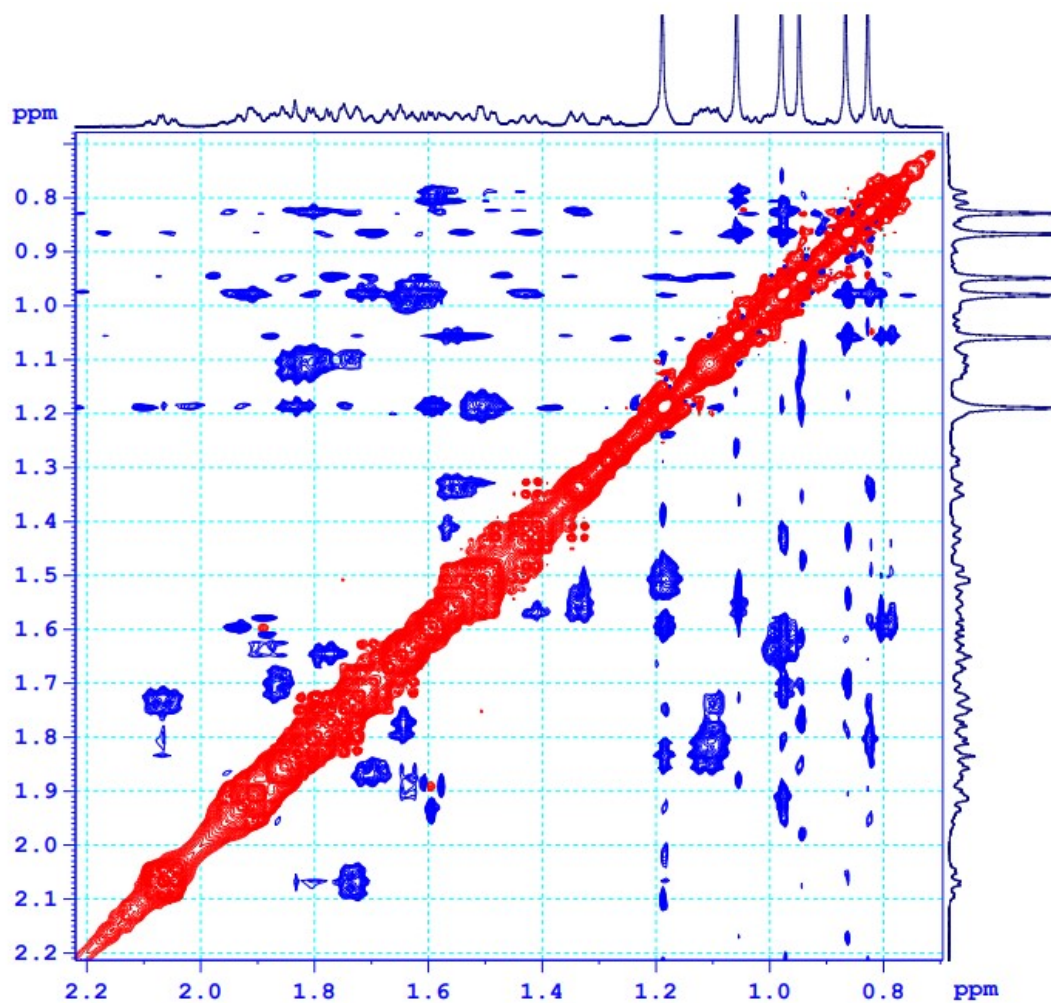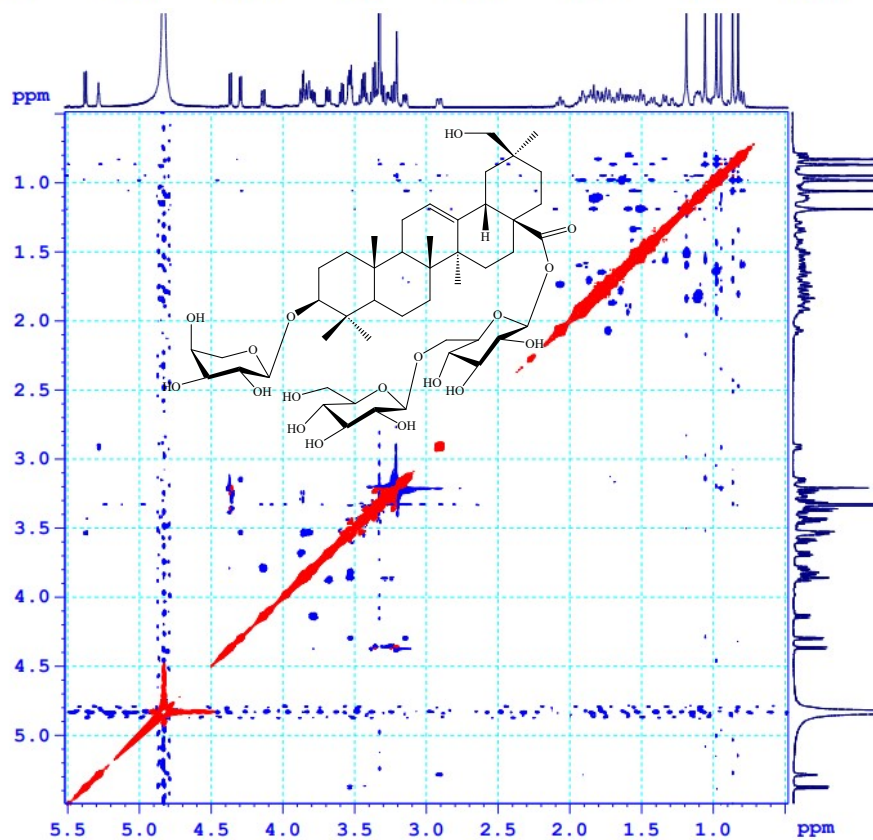

Figure S74. NOESY spectrum of compound **7** in CD<sub>3</sub>OD

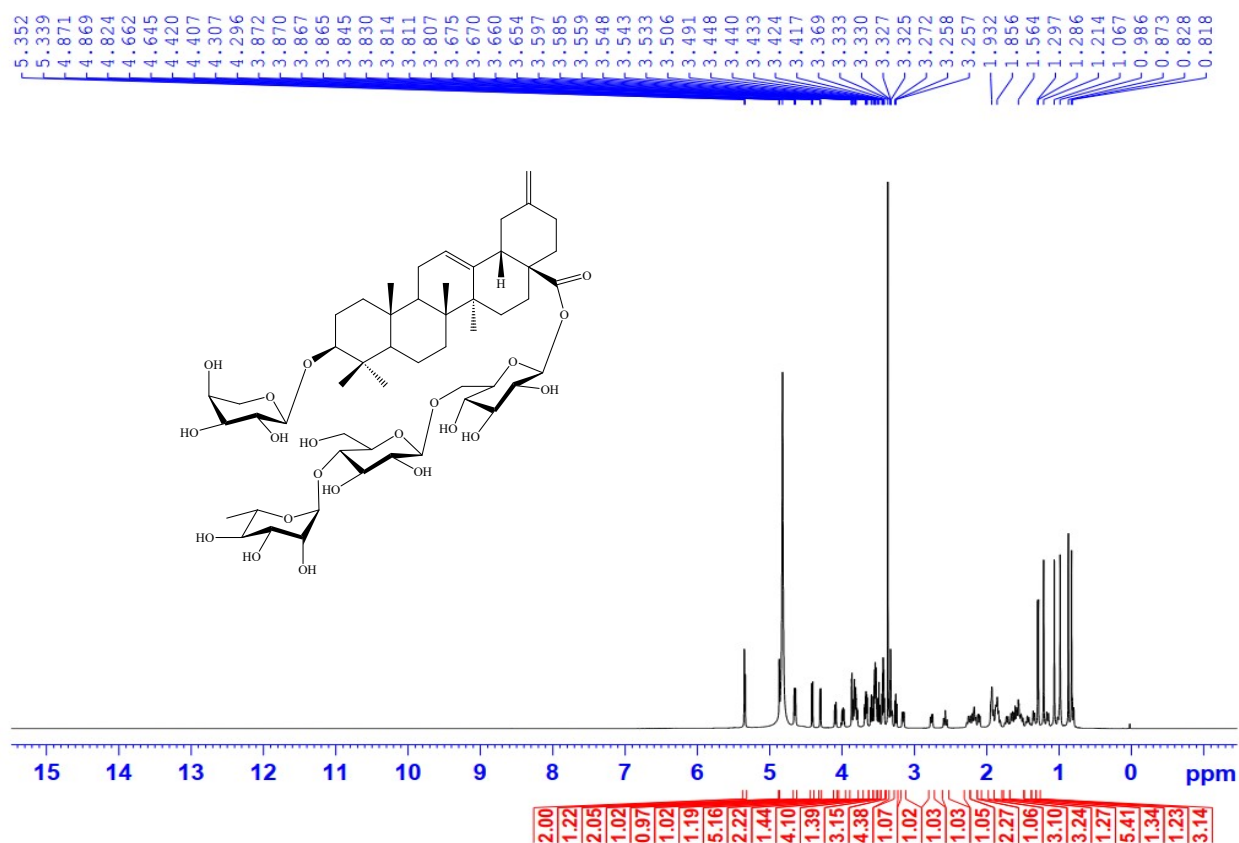

Figure S75.  $^1\text{H}$ -NMR spectrum of compound **8** in  $\text{CD}_3\text{OD}$

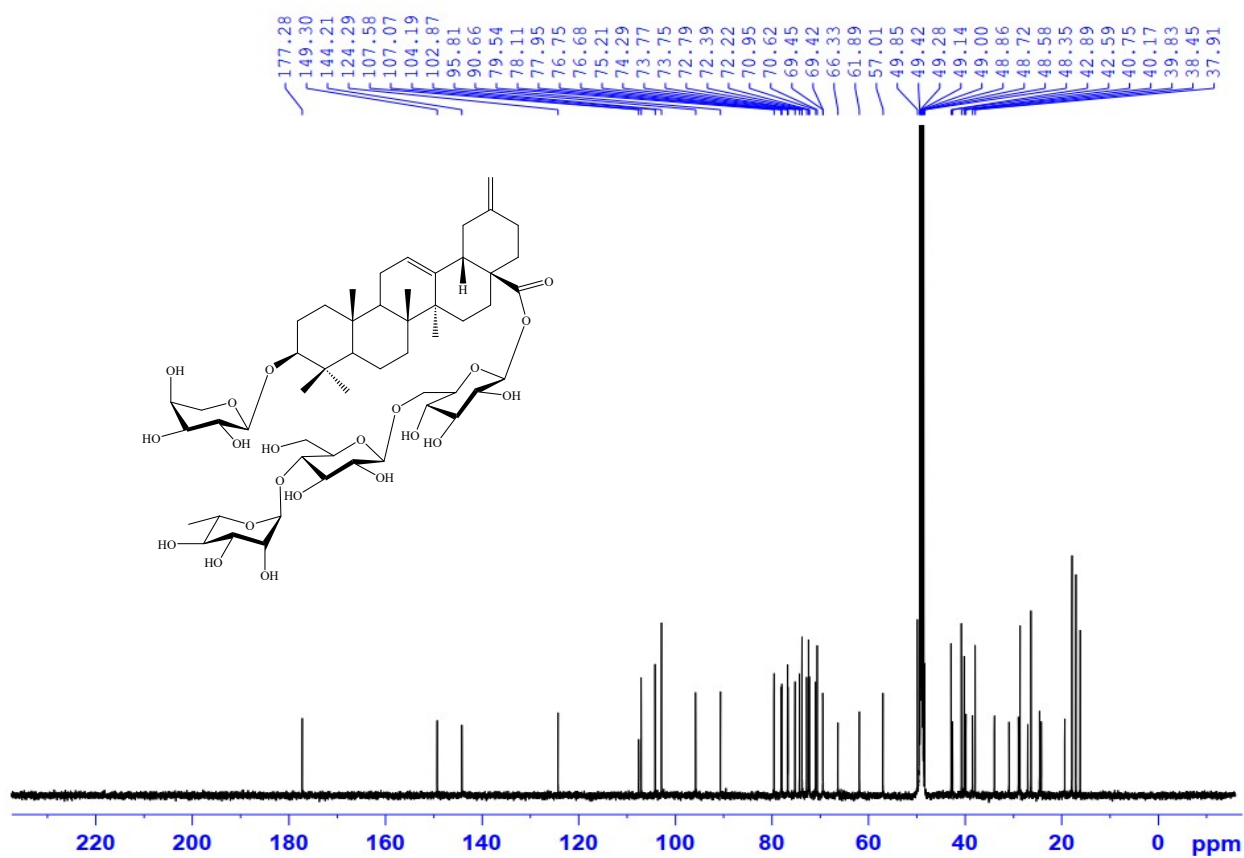

Figure S76.  $^{13}\text{C}$ -NMR spectrum of compound **8** in  $\text{CD}_3\text{OD}$

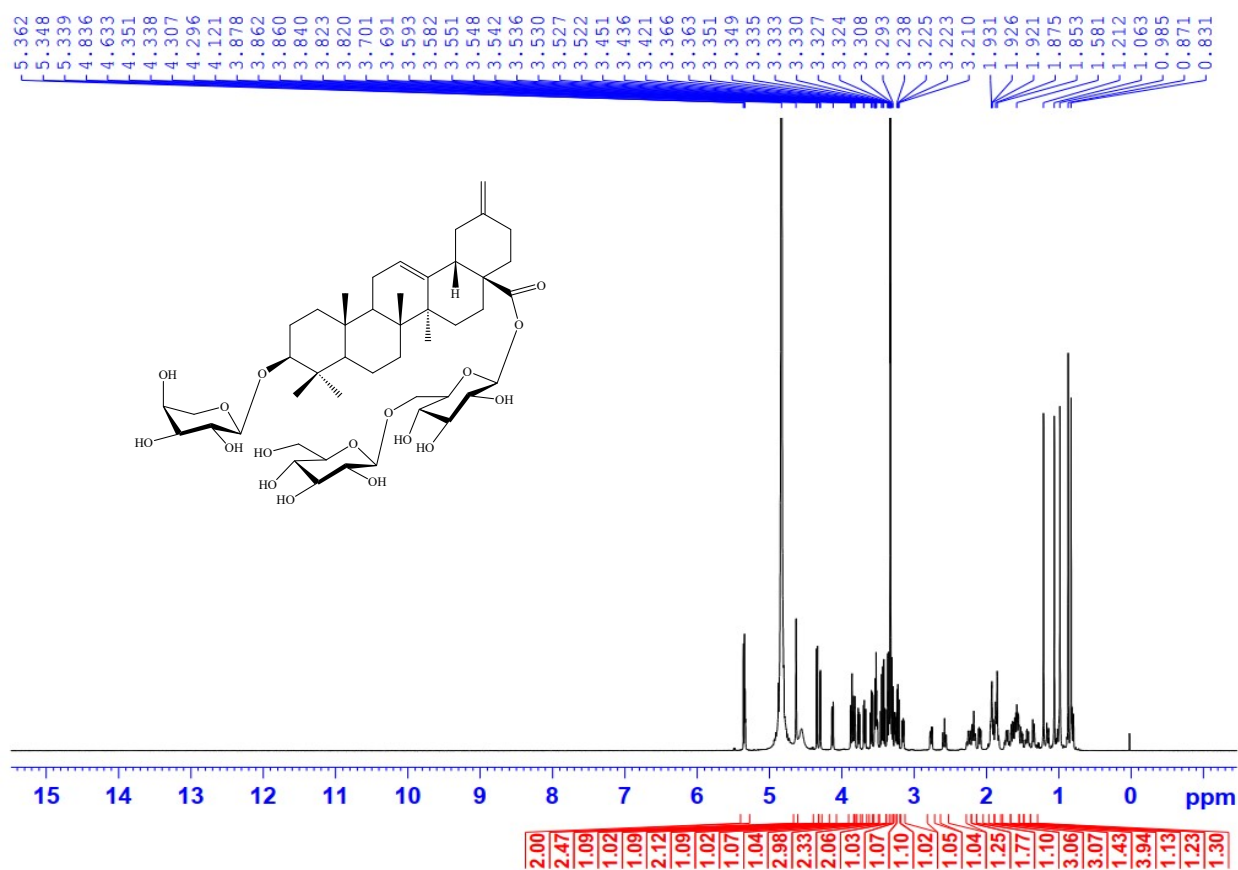

Figure S77.  $^1\text{H}$ -NMR spectrum of compound 9 in  $\text{CD}_3\text{OD}$

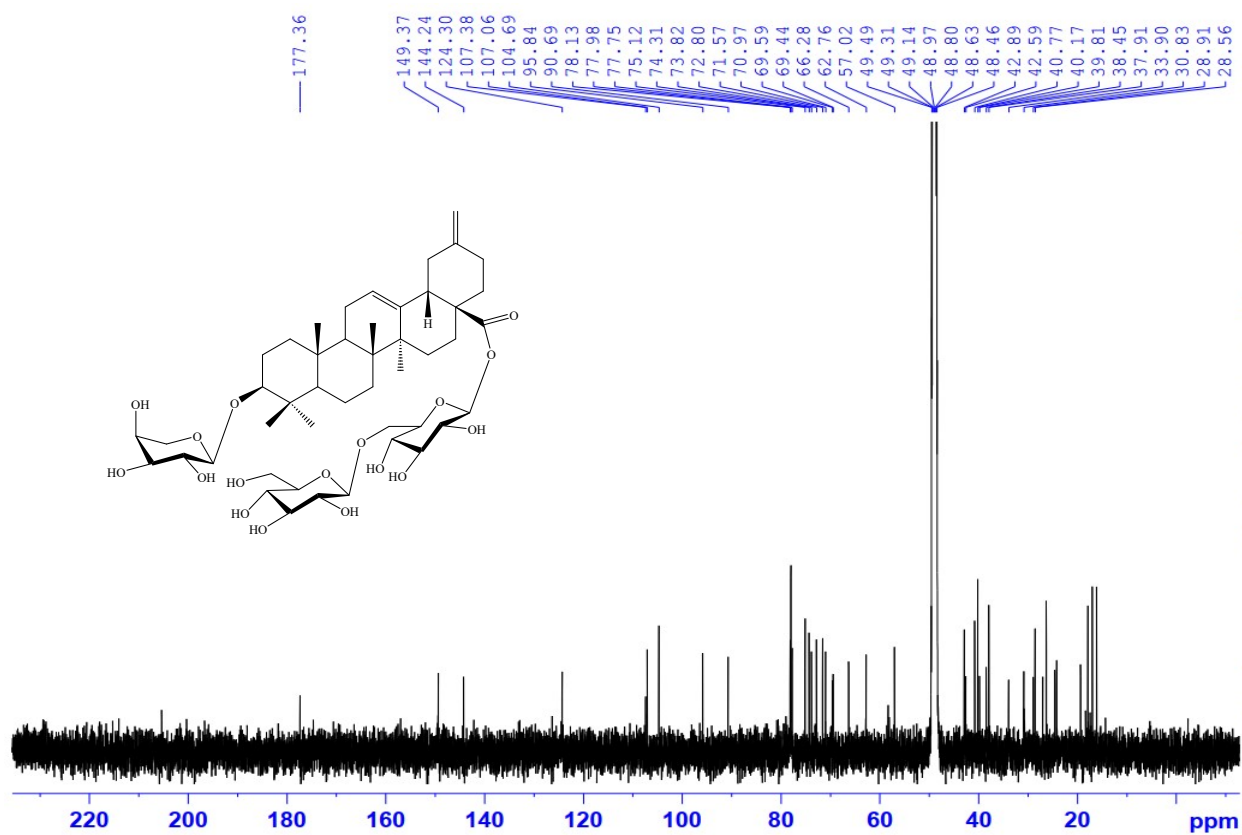

Figure S78.  $^{13}\text{C}$ -NMR spectrum of compound 9 in  $\text{CD}_3\text{OD}$

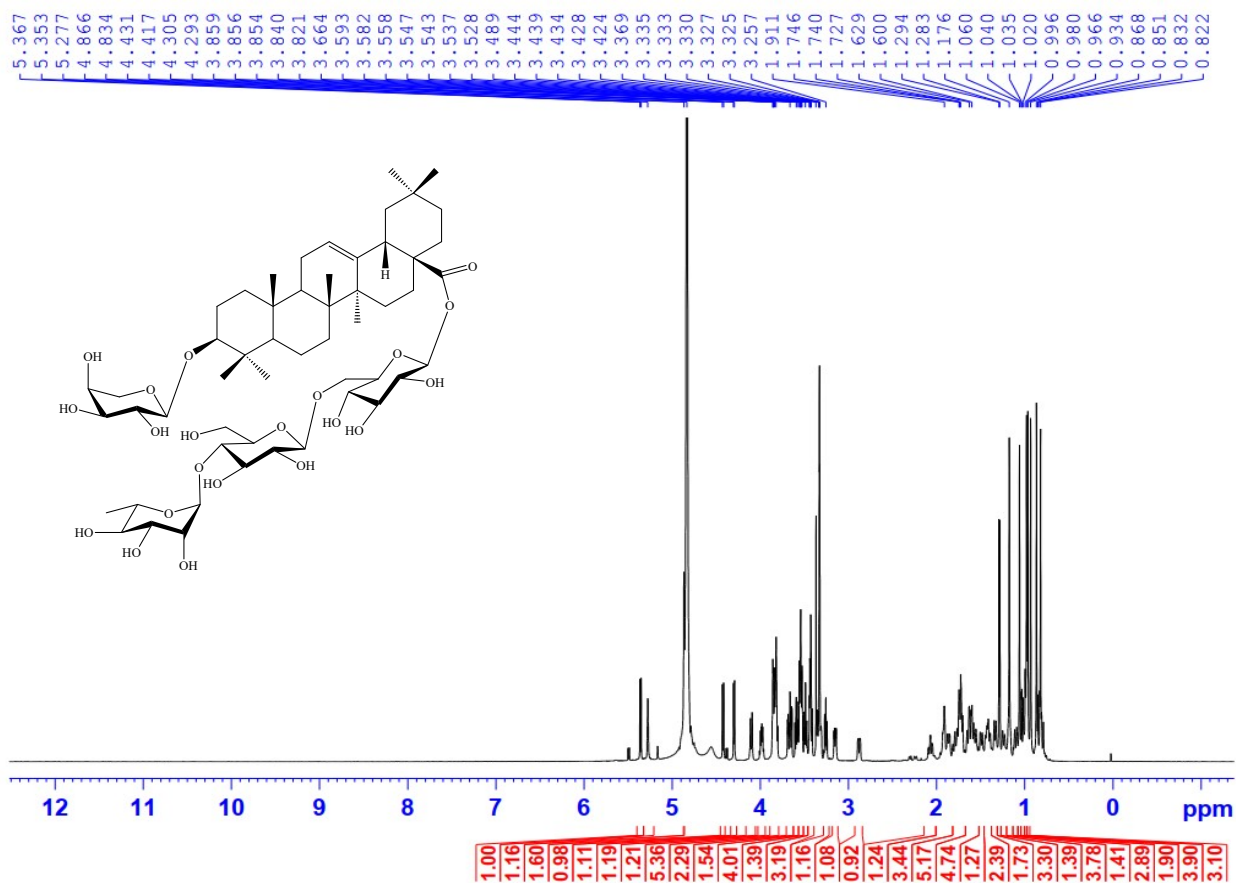

Figure S79.  $^1\text{H}$ -NMR spectrum of compound **10** in  $\text{CD}_3\text{OD}$

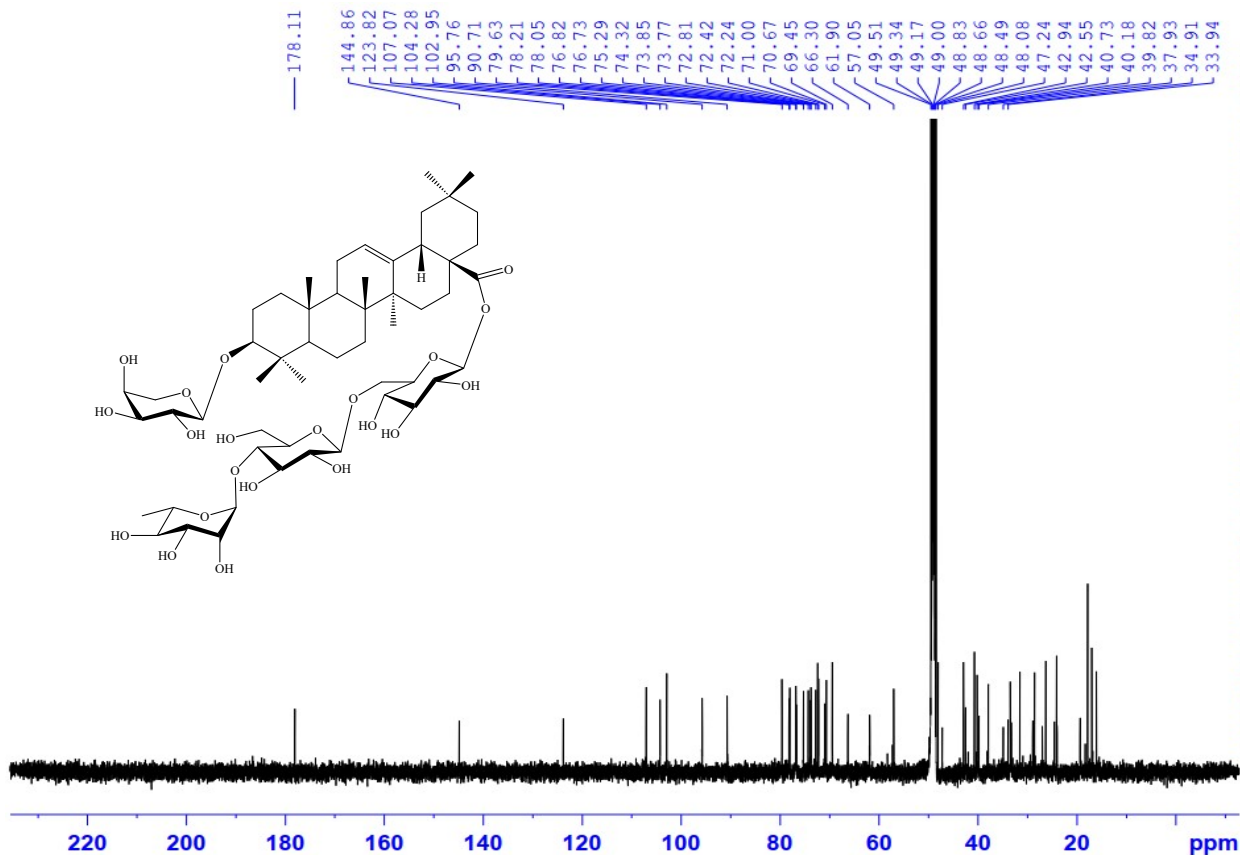

Figure S80.  $^{13}\text{C}$ -NMR spectrum of compound **10** in  $\text{CD}_3\text{OD}$

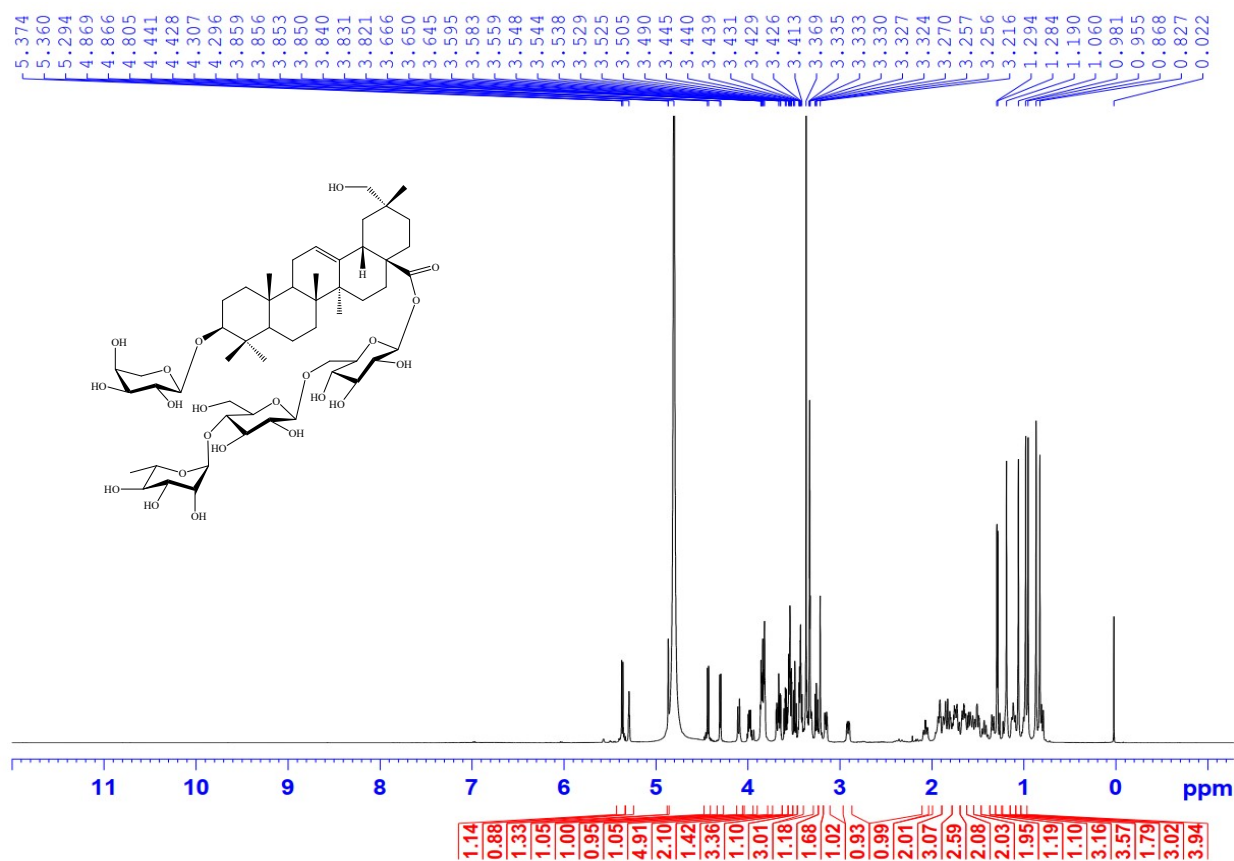

Figure S81.  $^1\text{H}$ -NMR spectrum of compound **11** in  $\text{CD}_3\text{OD}$

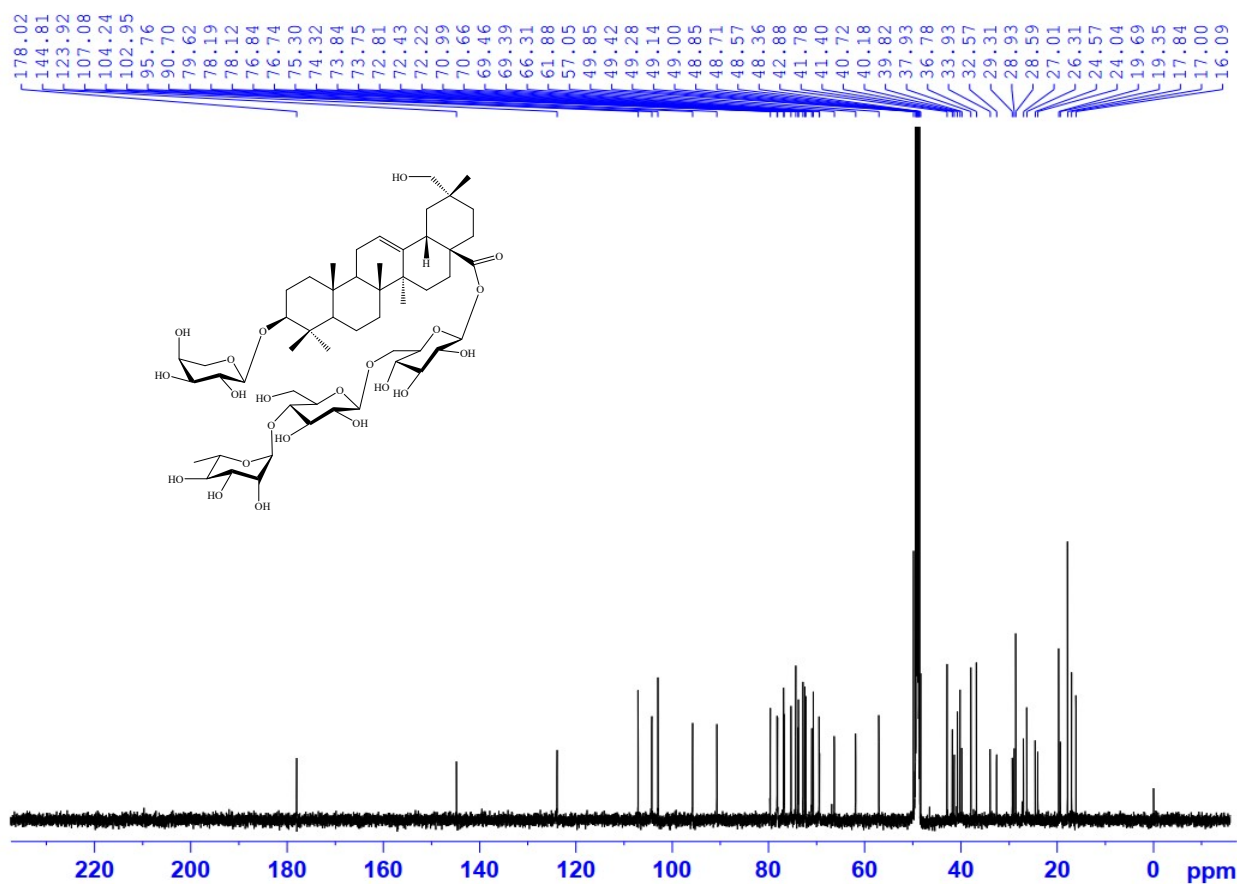

Figure S82.  $^{13}\text{C}$ -NMR spectrum of compound **11** in  $\text{CD}_3\text{OD}$

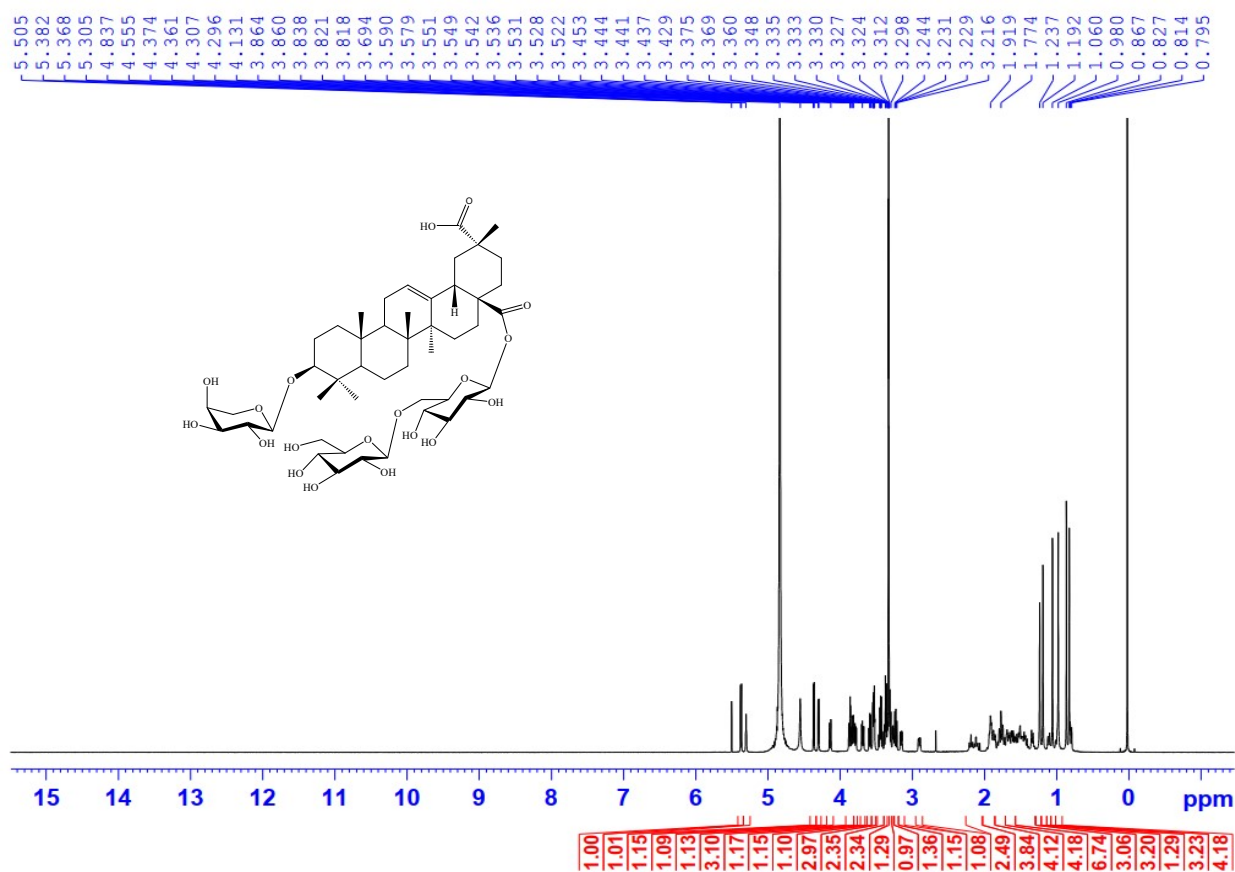

Figure S83.  $^1\text{H}$ -NMR spectrum of compound 12 in  $\text{CD}_3\text{OD}$

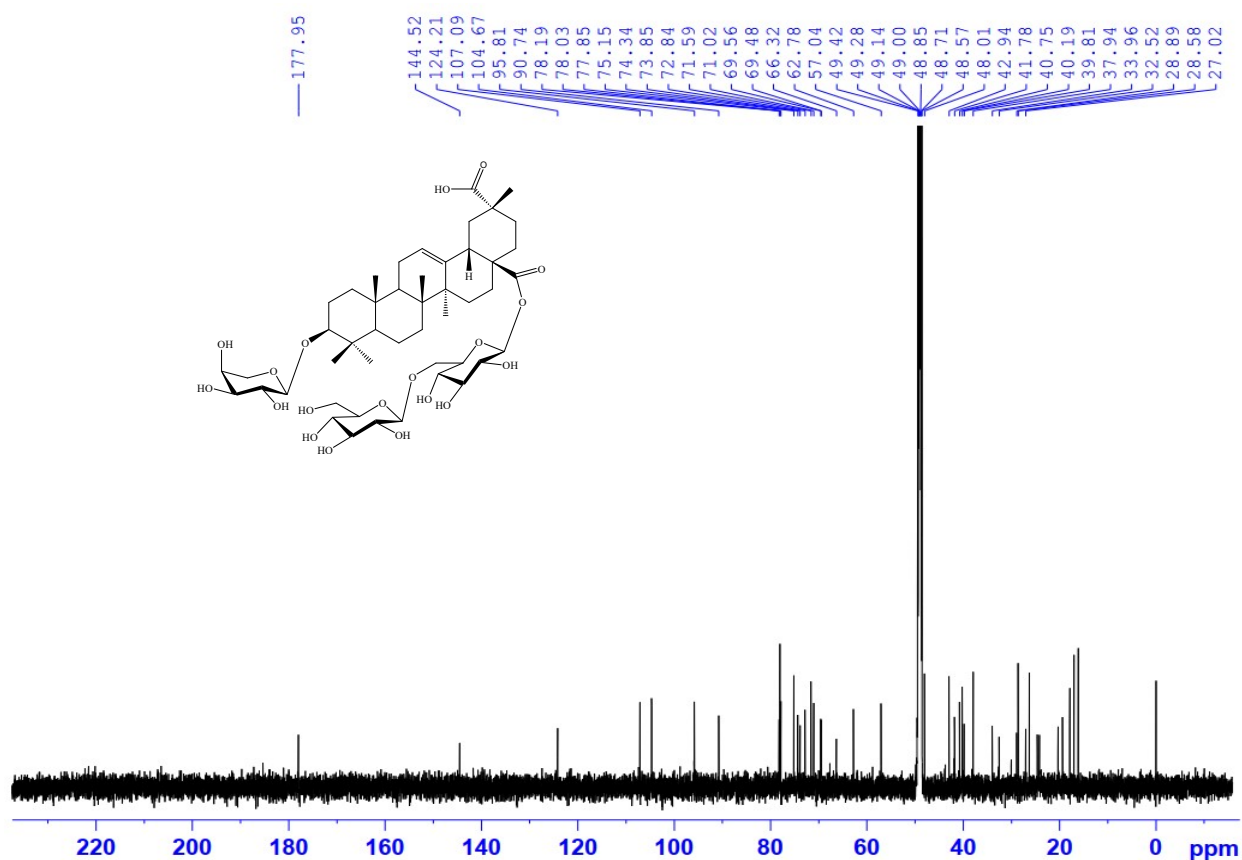

Figure S84.  $^{13}\text{C}$ -NMR spectrum of compound 12 in  $\text{CD}_3\text{OD}$

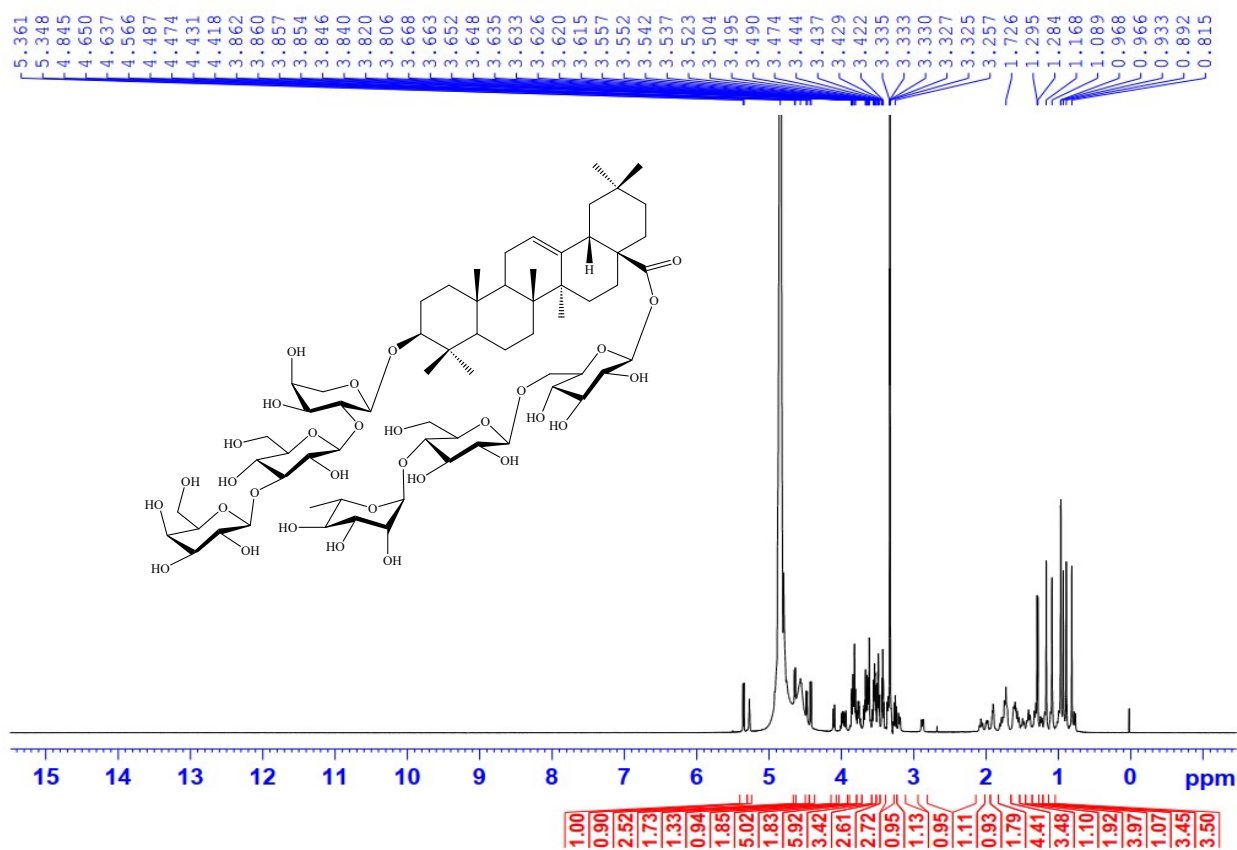

Figure S85. <sup>1</sup>H-NMR spectrum of compound **13** in CD<sub>3</sub>OD

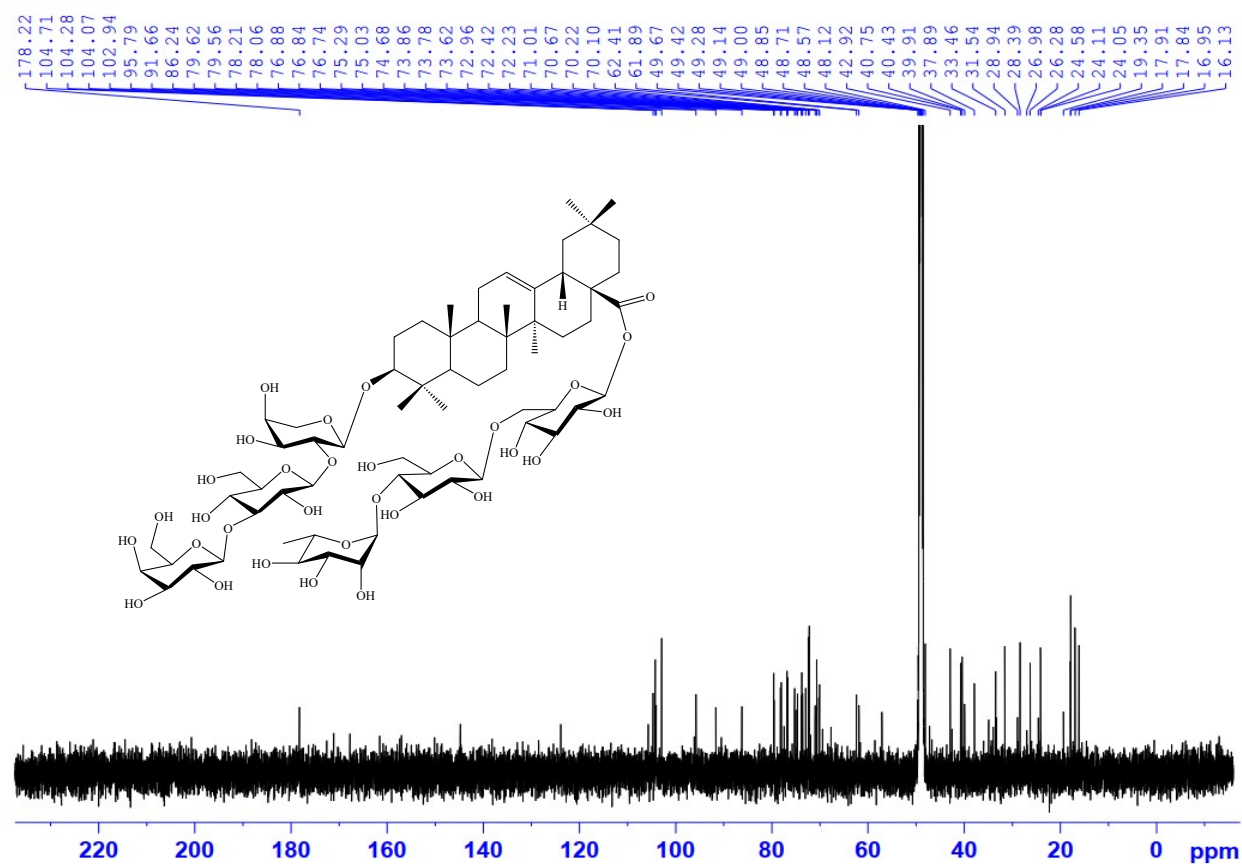

Figure S86. <sup>13</sup>C-NMR spectrum of compound **13** in CD<sub>3</sub>OD
